# Supplementary material
Source: PubMed Central journal article supplement (PMC3594699)

## Supporting Information

### Efficient Microwave-assisted One-pot Three-component Synthesis of 2,3-Disubstituted Benzofurans under Sonogashira Conditions

Nataliya A. Markina, Yu Chen, and Richard C. Larock

*Department of Chemistry, Iowa State University, Ames, IA, 50011*

*larock@iastate.edu*

#### Table of Contents

|                                                          |        |
|----------------------------------------------------------|--------|
| Table of Contents                                        | 1      |
| Copies of <sup>1</sup> H and <sup>13</sup> C NMR spectra | 2 - 72 |

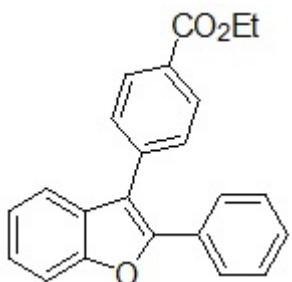

7

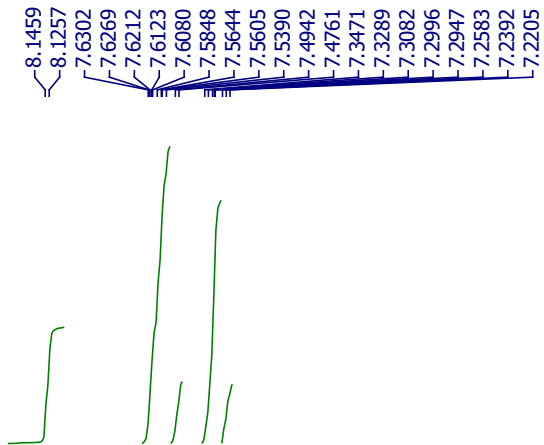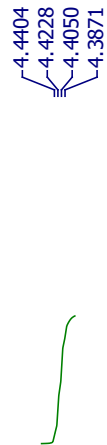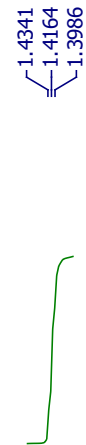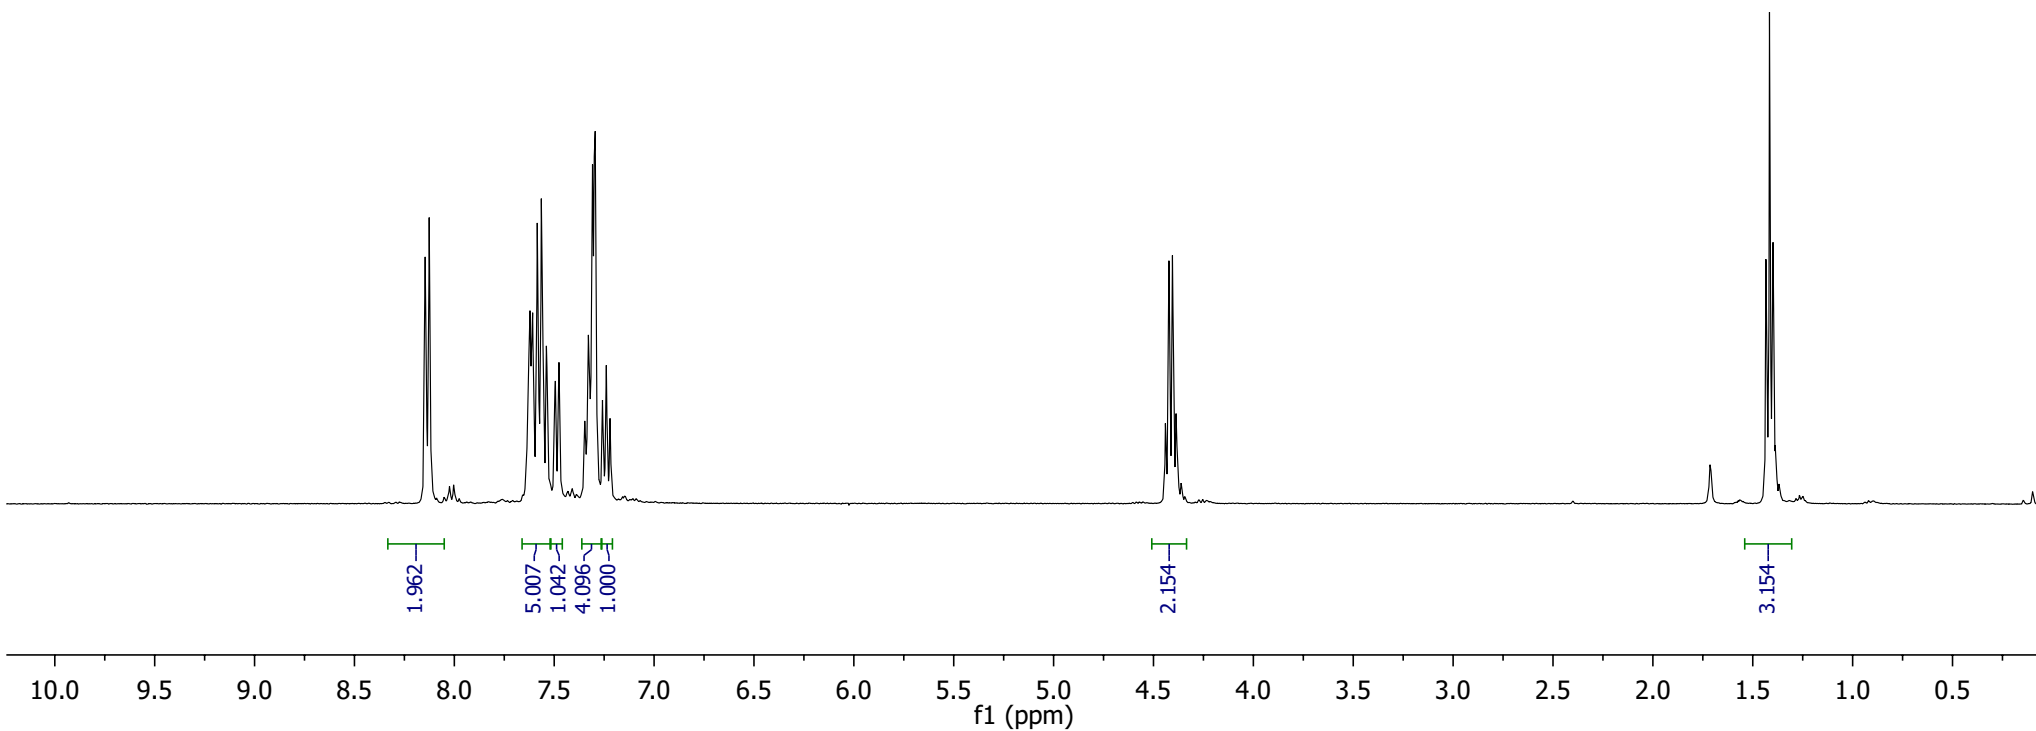

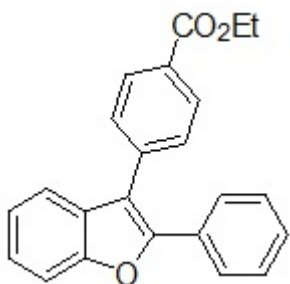

7

— 166.5636  
— 154.2187  
— 151.3084  
— 137.9474  
— 130.3591  
— 129.8329  
— 129.7476  
— 128.8819  
— 128.6982  
— 127.3755  
— 125.0822  
— 123.3259  
— 119.9260  
— 111.4226

— 77.5508 CDCl<sub>3</sub>  
— 77.2331 CDCl<sub>3</sub>  
— 76.9149 CDCl<sub>3</sub>

— 61.2543

— 14.5776

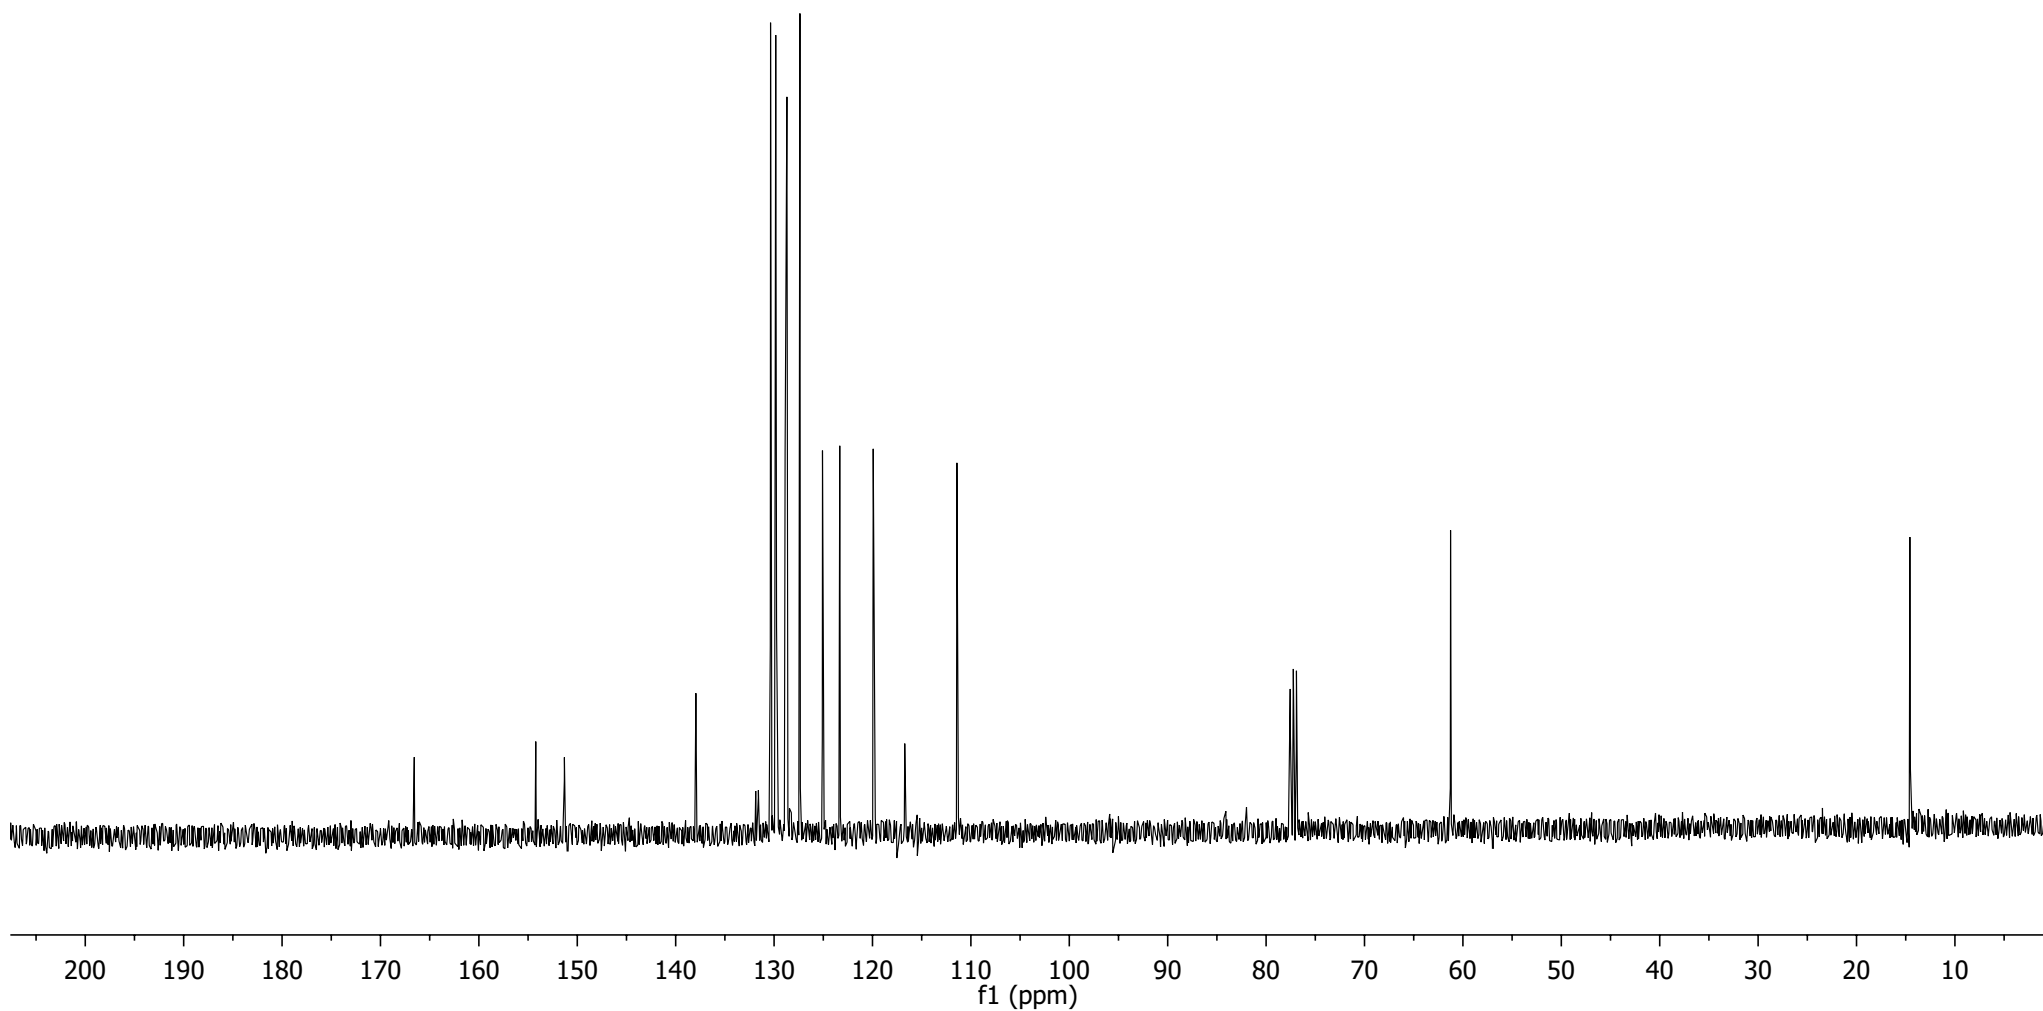

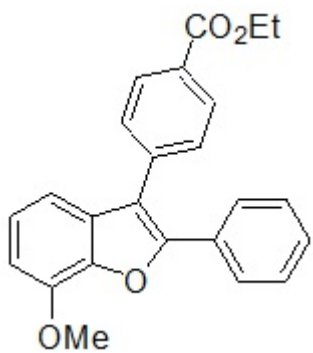

9

8.1517  
8.1316  
7.6539  
7.6446  
7.6003  
7.5802  
7.5273  
7.3181  
7.3106  
7.2094  
7.1897  
7.1701  
7.1110  
7.0914  
6.8842  
6.8646

4.4569  
4.4391  
4.4213  
4.4036  
4.0771

1.4529  
1.4350  
1.4174

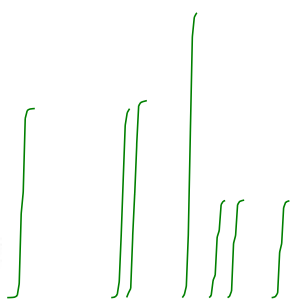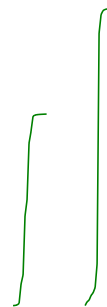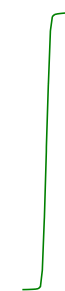

1.95  
1.95  
2.04  
2.94  
1.00  
1.01  
1.00

1.98  
3.07

2.87

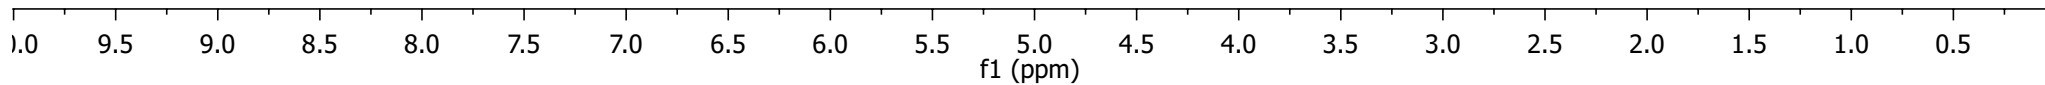

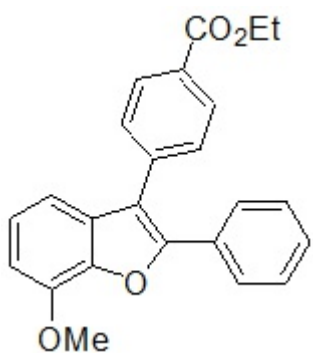

9

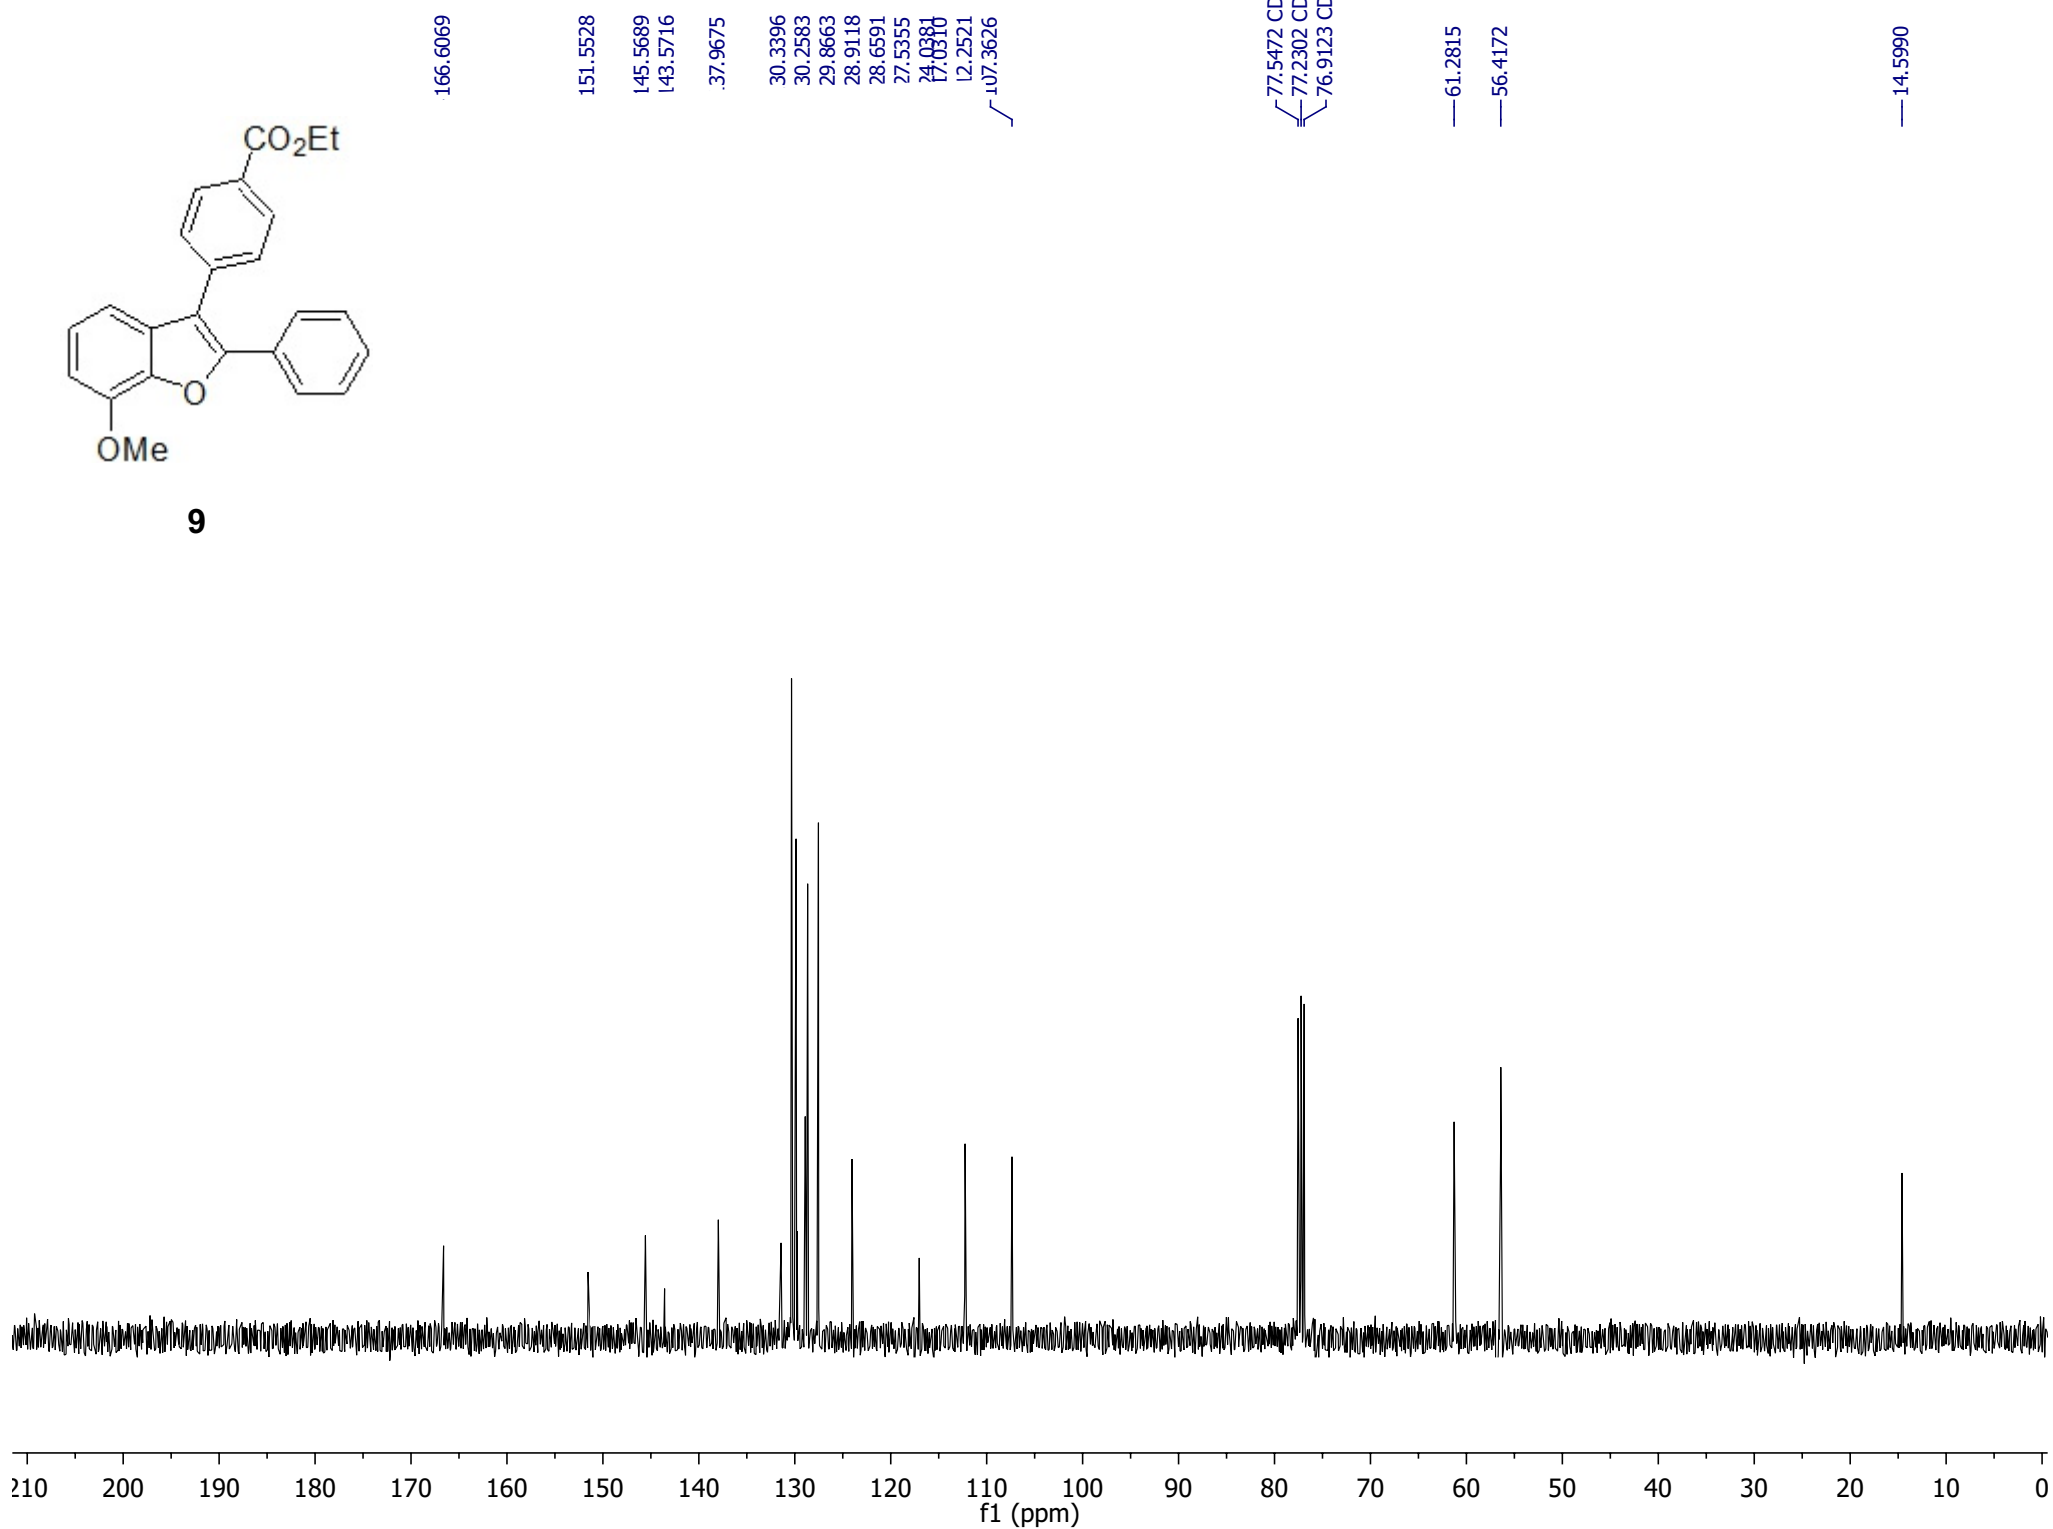

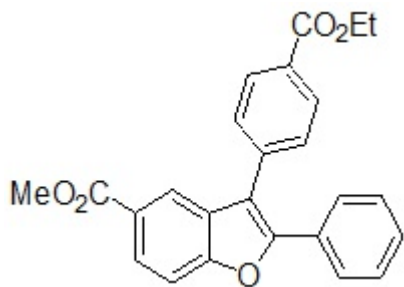

11

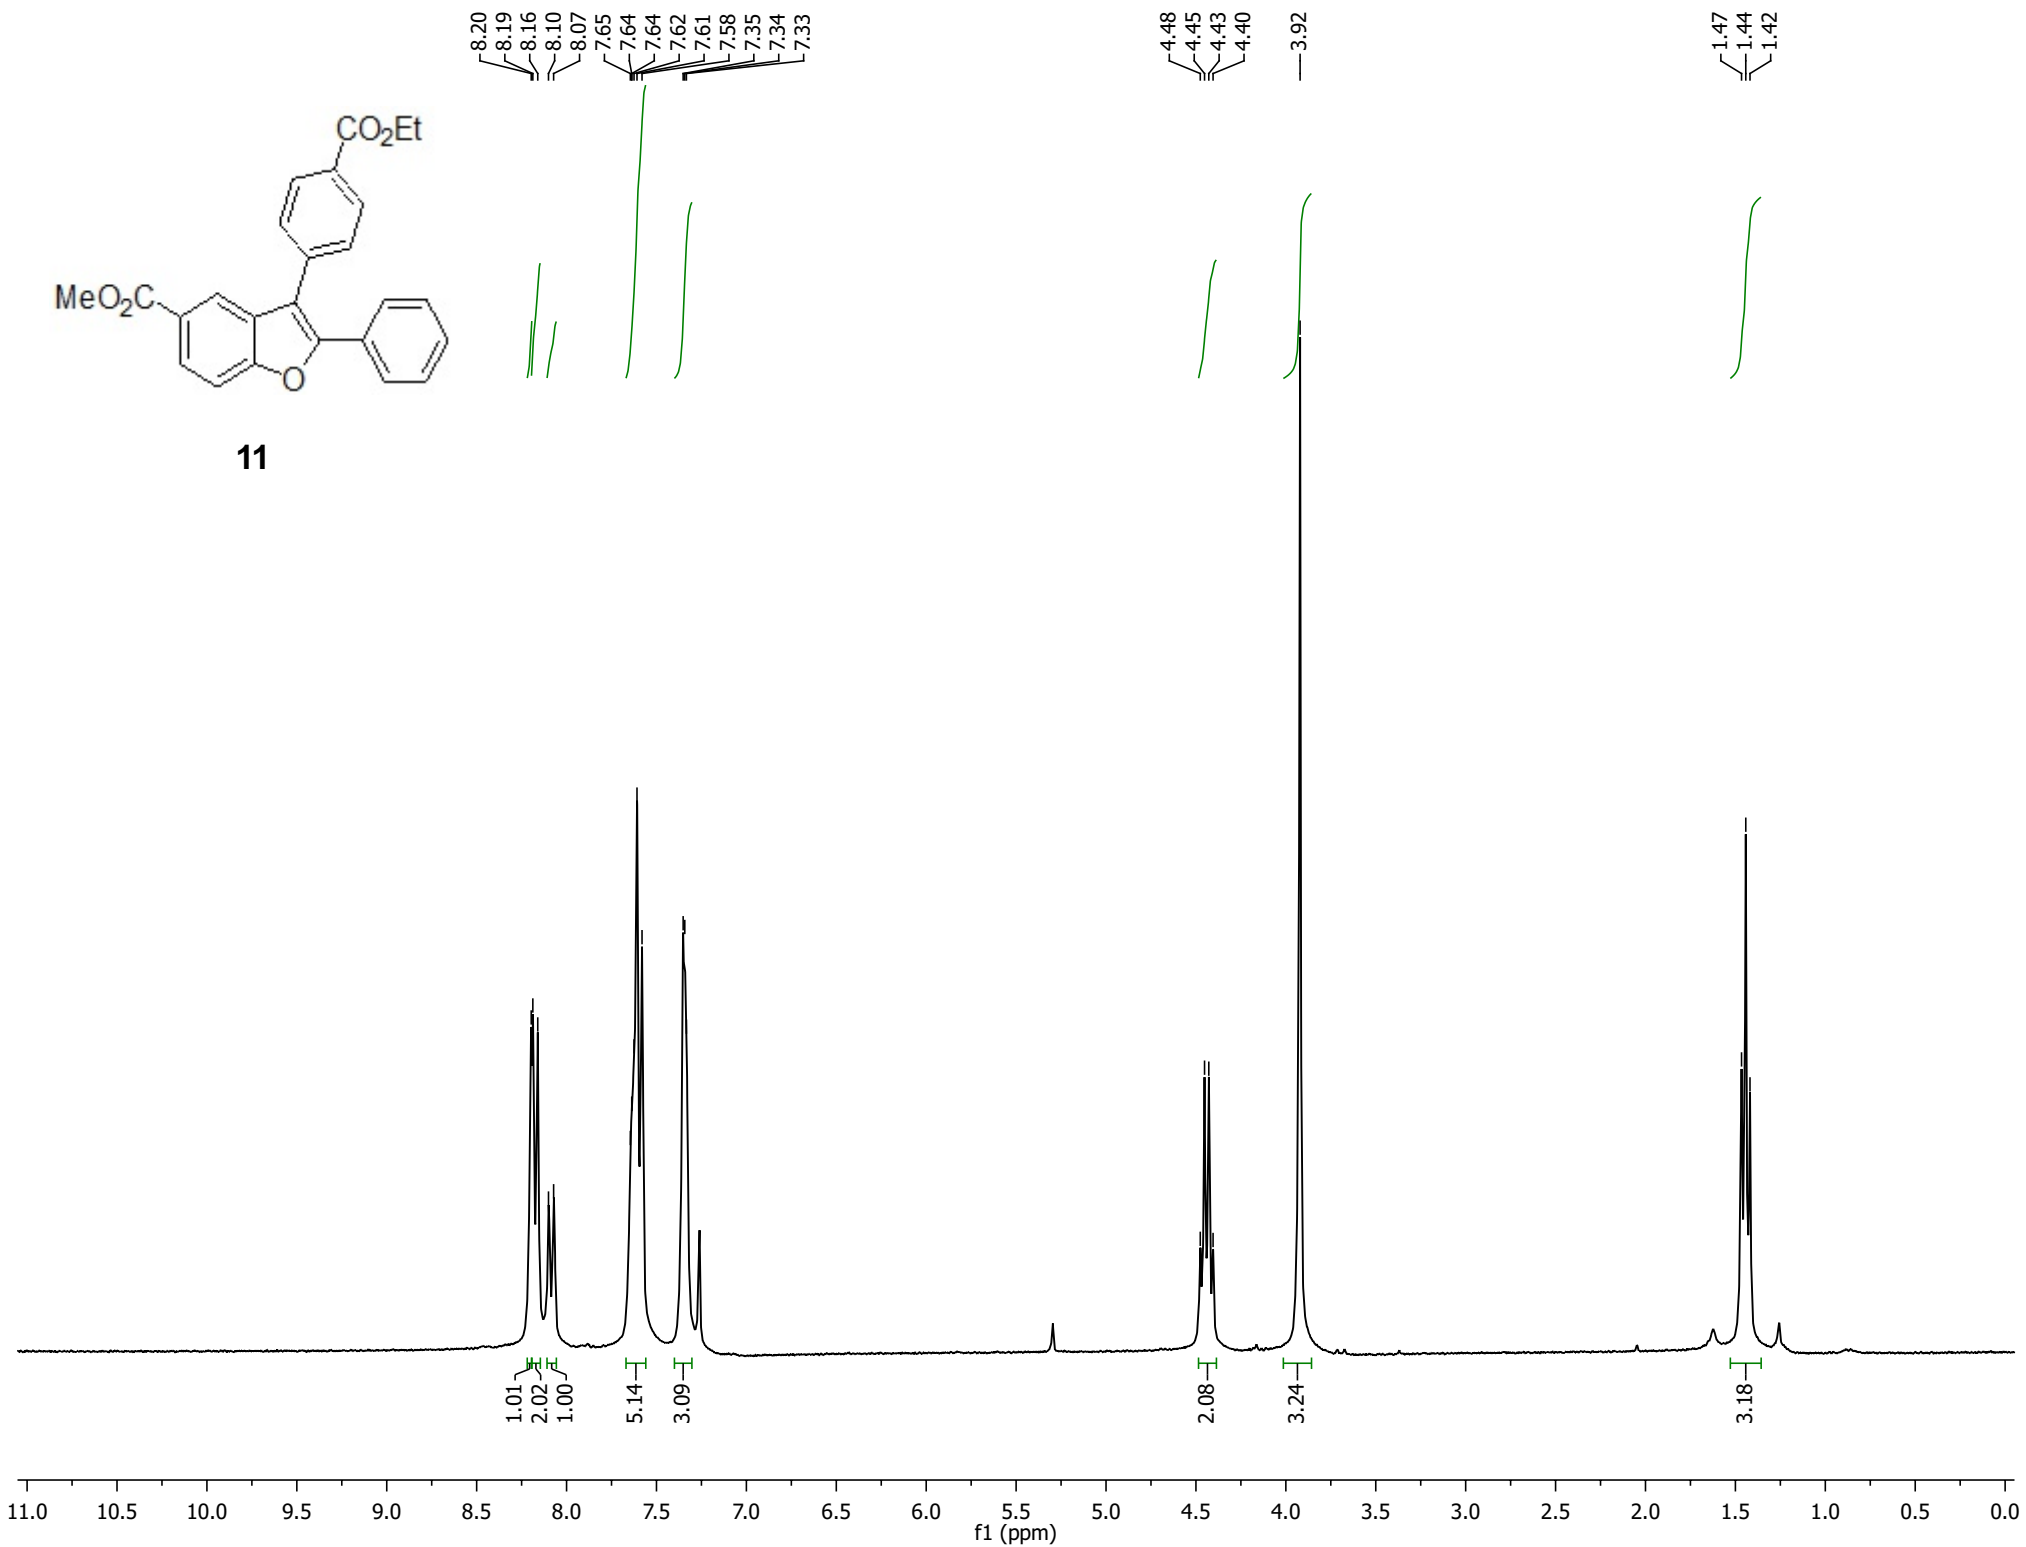

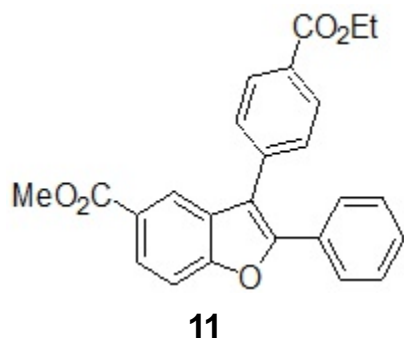

167.29  
166.54

156.80  
152.69

137.15  
130.57  
129.89  
128.85  
127.43  
126.93  
122.40  
111.37

77.65 CDC13  
77.22 CDC13  
76.80 CDC13

61.36

52.35

14.60

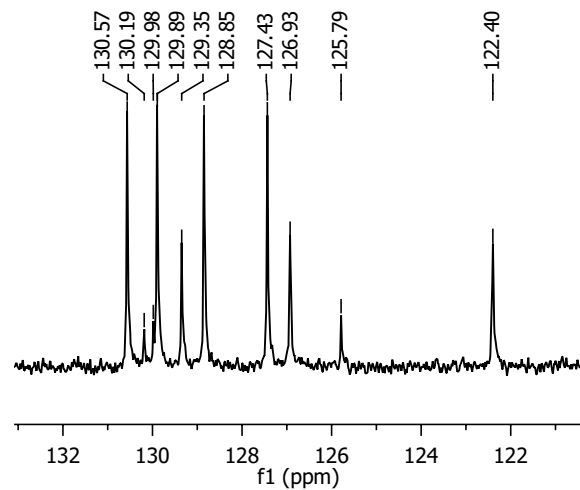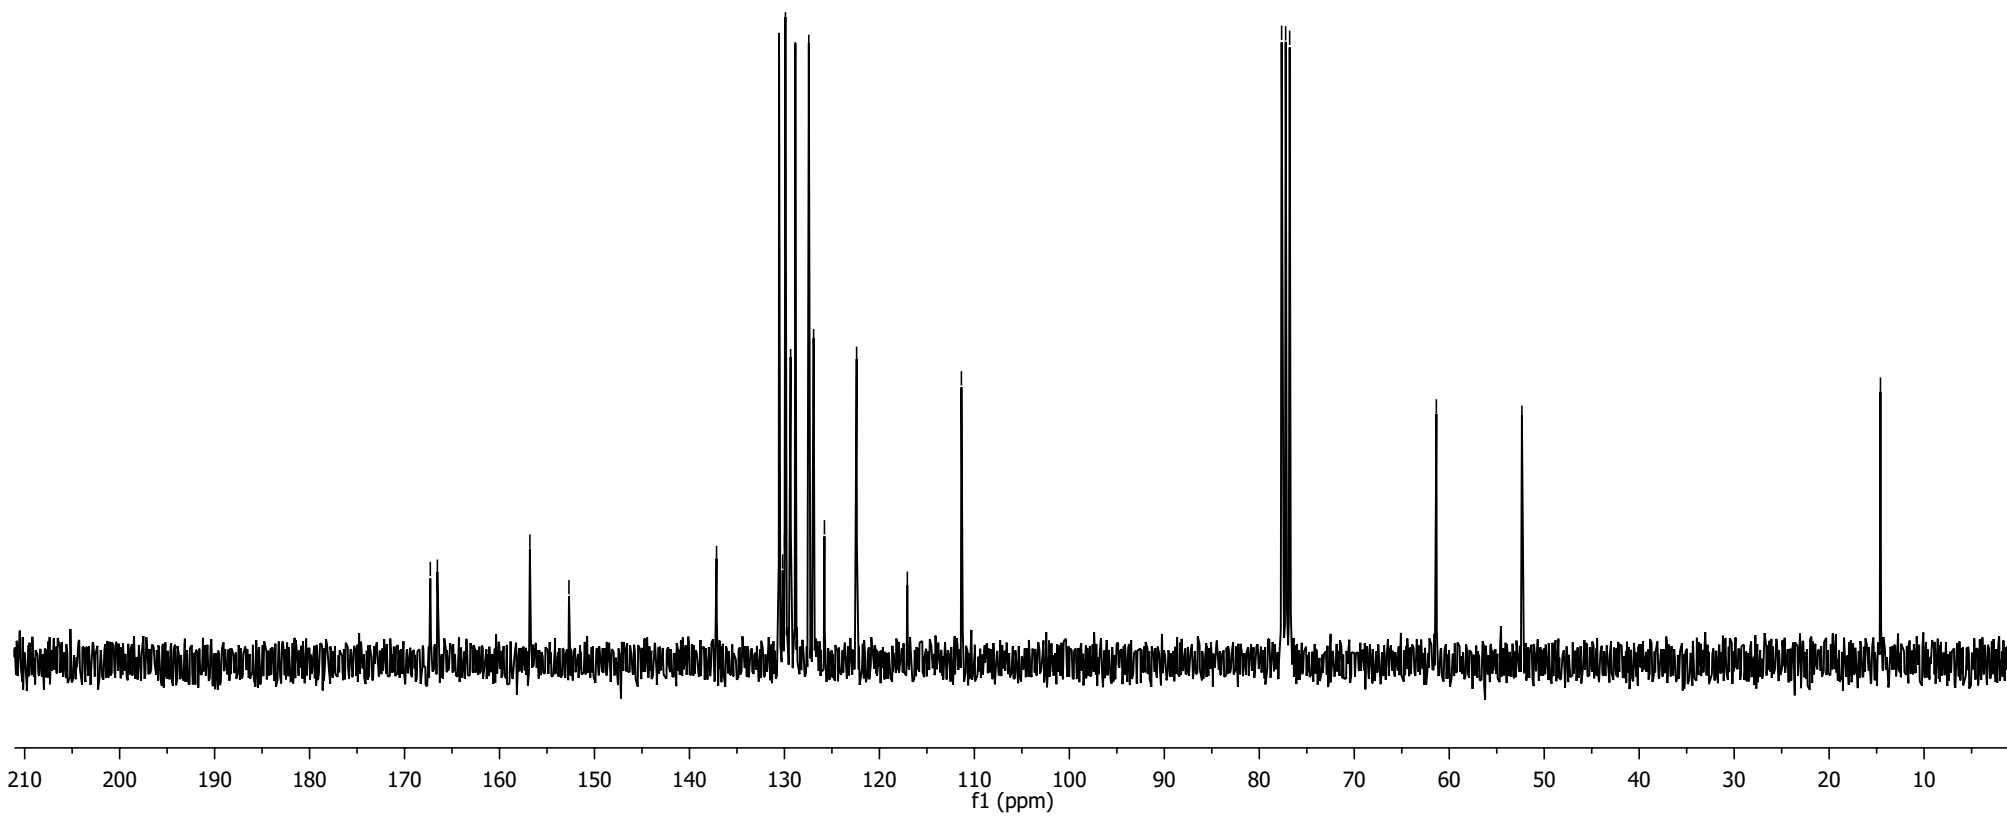

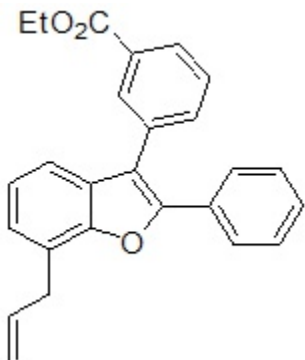

14

8.23 8.22 8.12 8.12 8.11 8.09 8.09 8.08 7.65 7.65 7.33 7.33 7.32 7.31 7.26 7.19 6.21 6.19 6.18 6.15 6.14 6.13 6.12 5.29 5.28 5.23 5.22 5.18 5.18 5.15 5.15 4.40 4.38 4.36 3.80 3.77 1.41 1.39 1.38 1.36

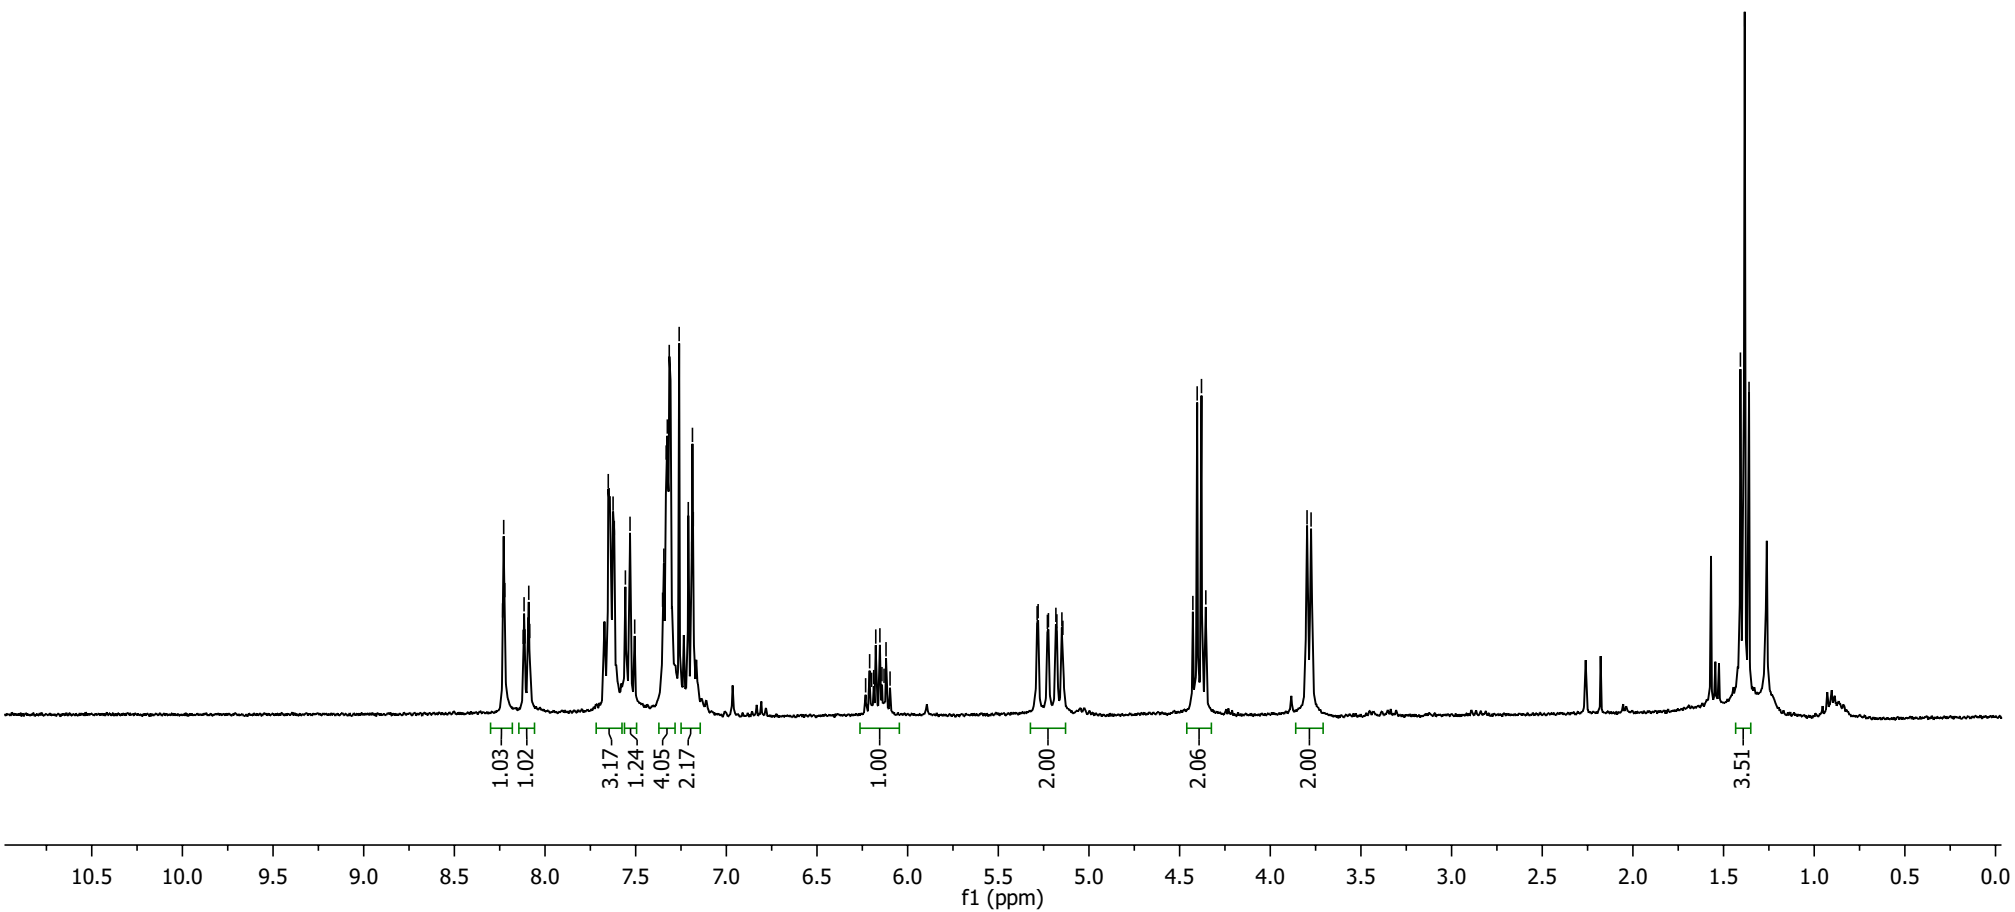



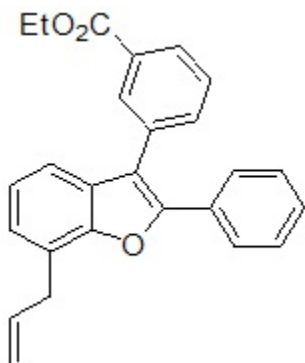

14

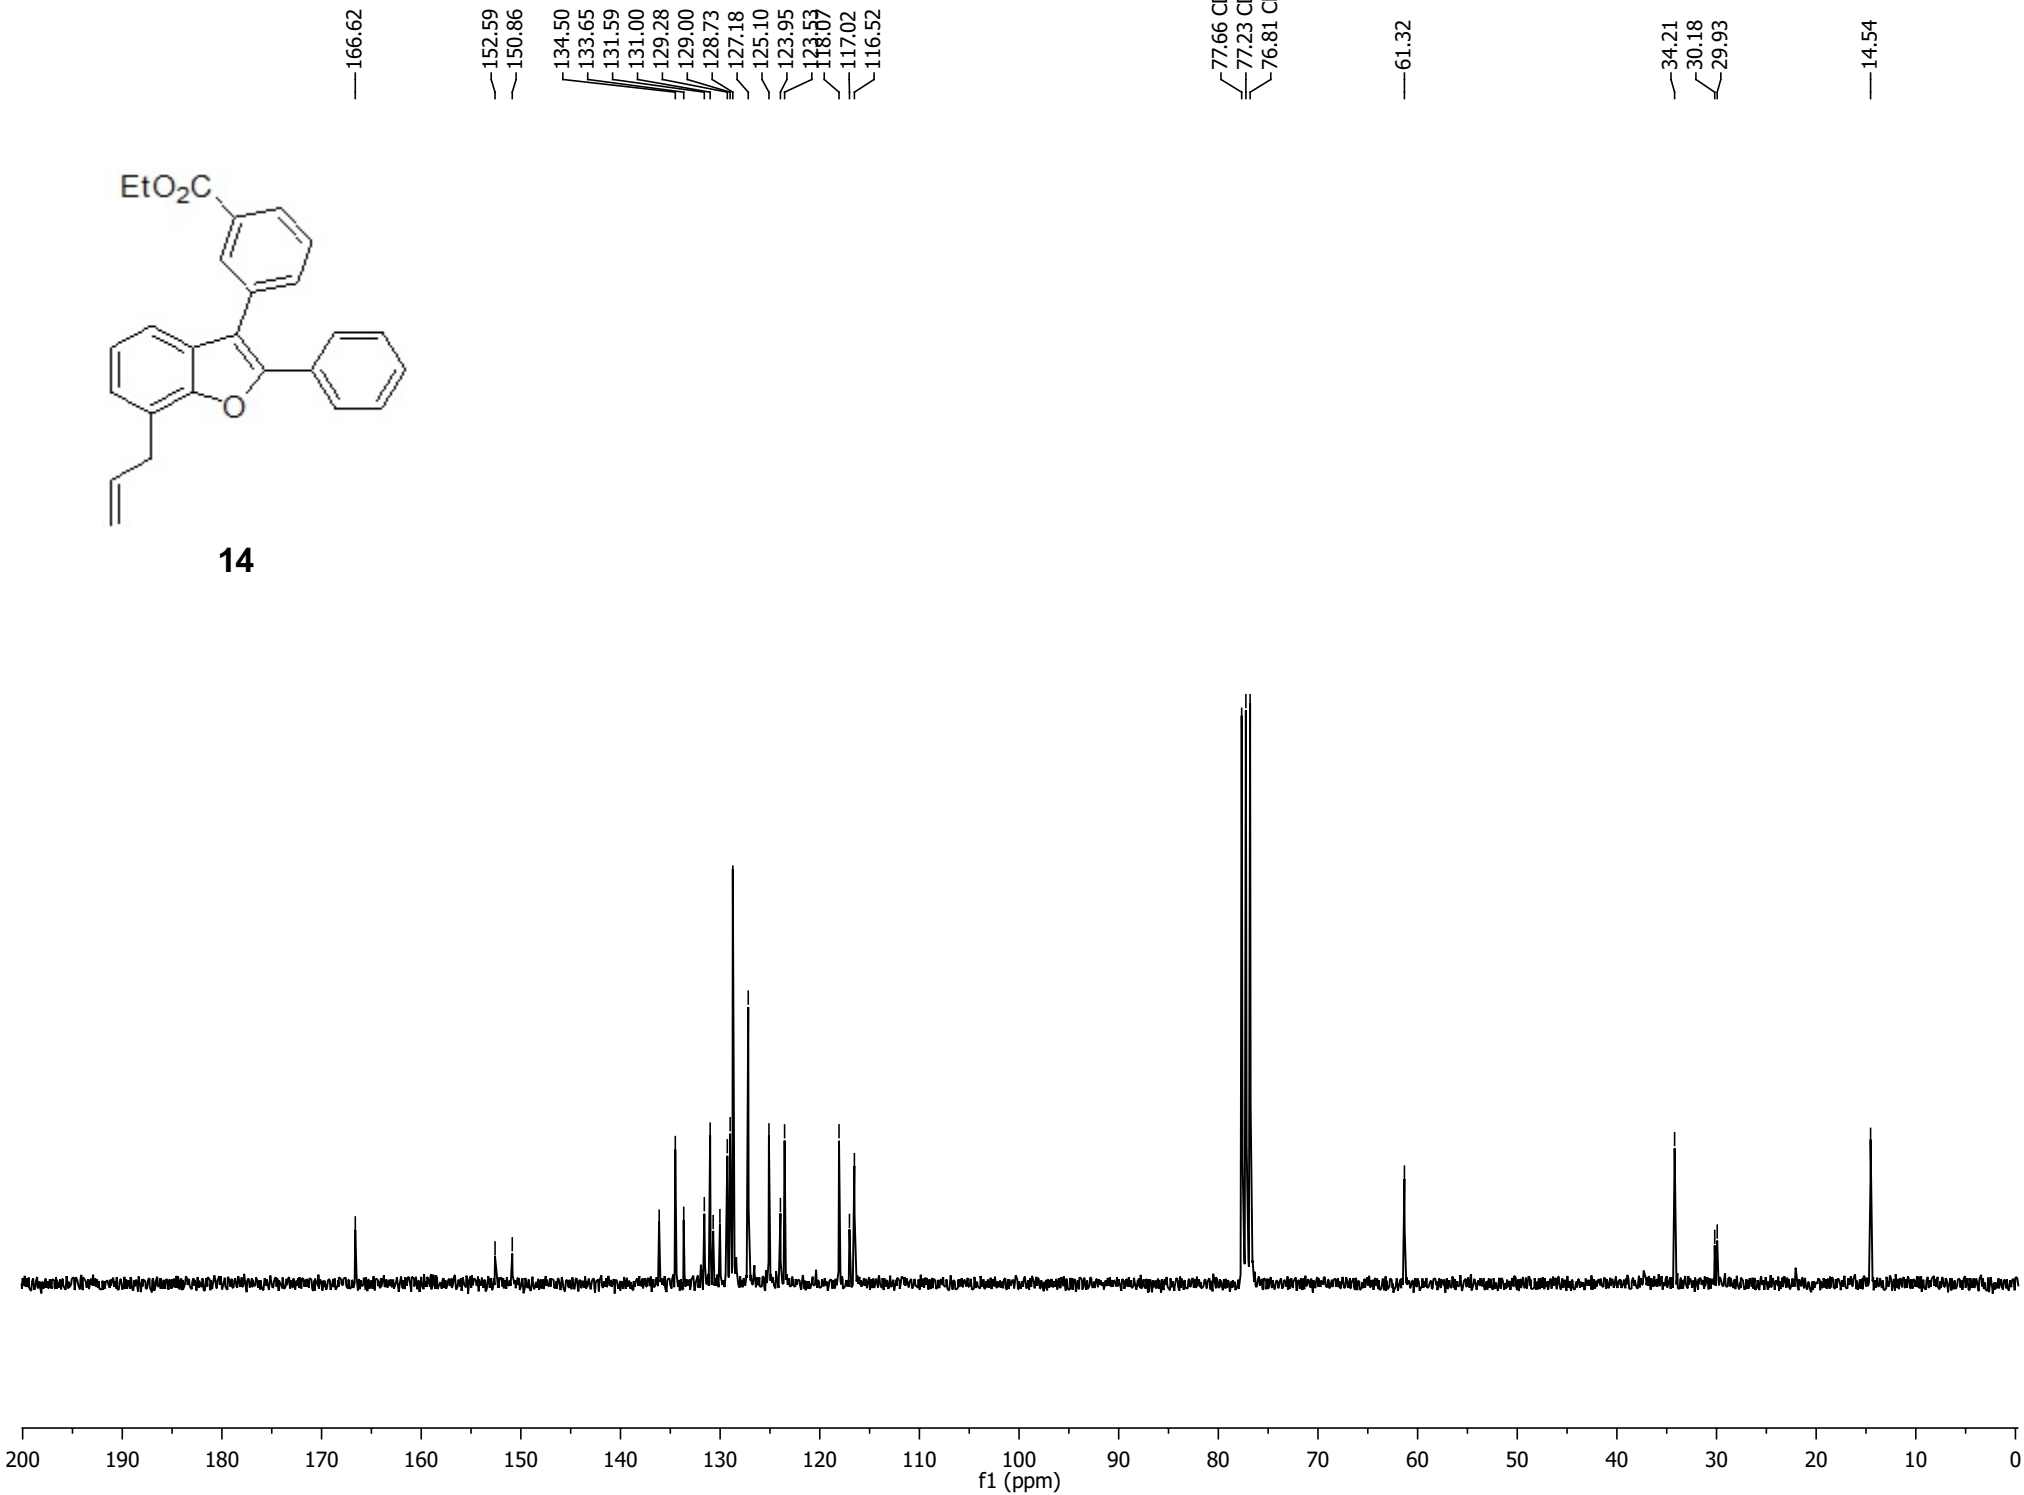

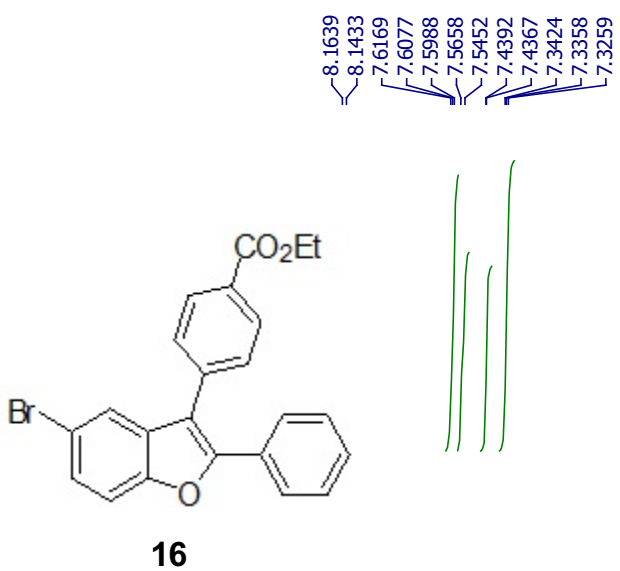

**16**

8.1639  
8.1433  
7.6169  
7.6077  
7.5988  
7.5658  
7.5452  
7.4392  
7.4367  
7.3424  
7.3358  
7.3259

4.4595  
4.4417  
4.4239  
4.4061

1.4539  
1.4361  
1.4182

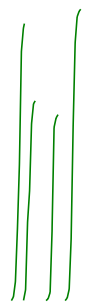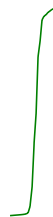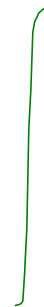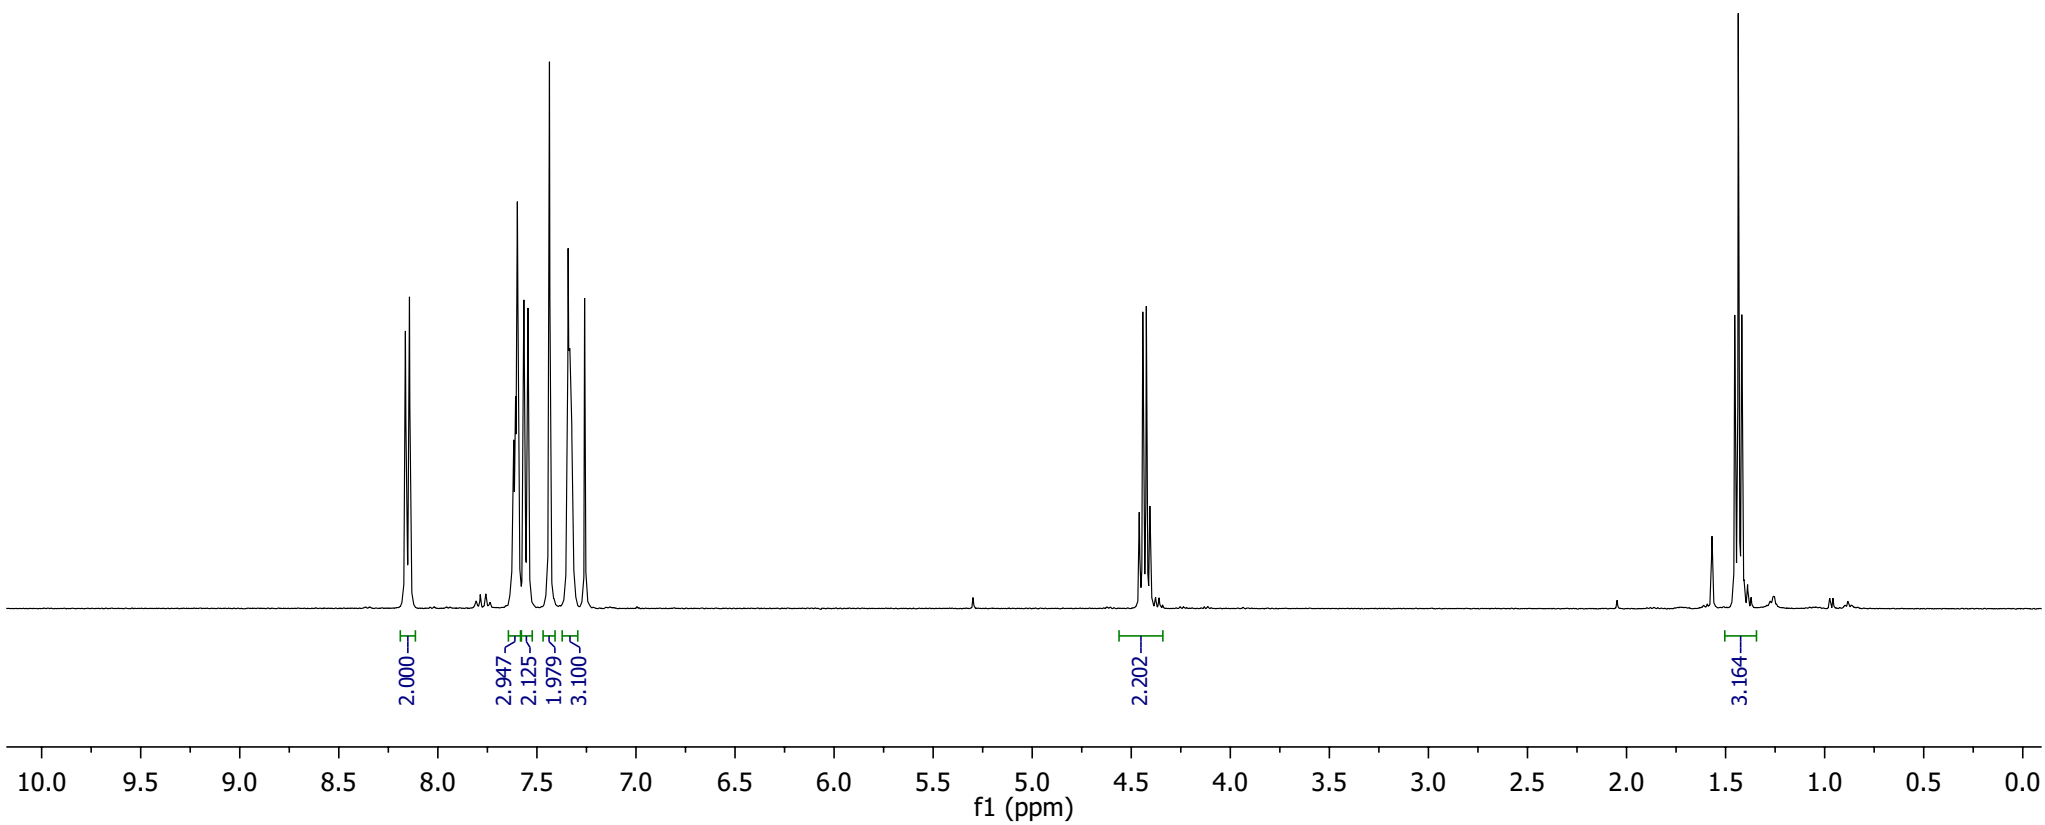

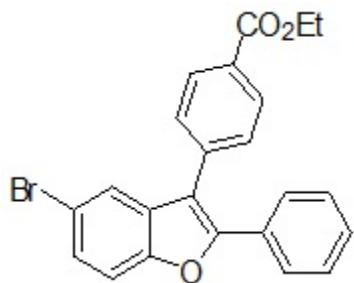

16

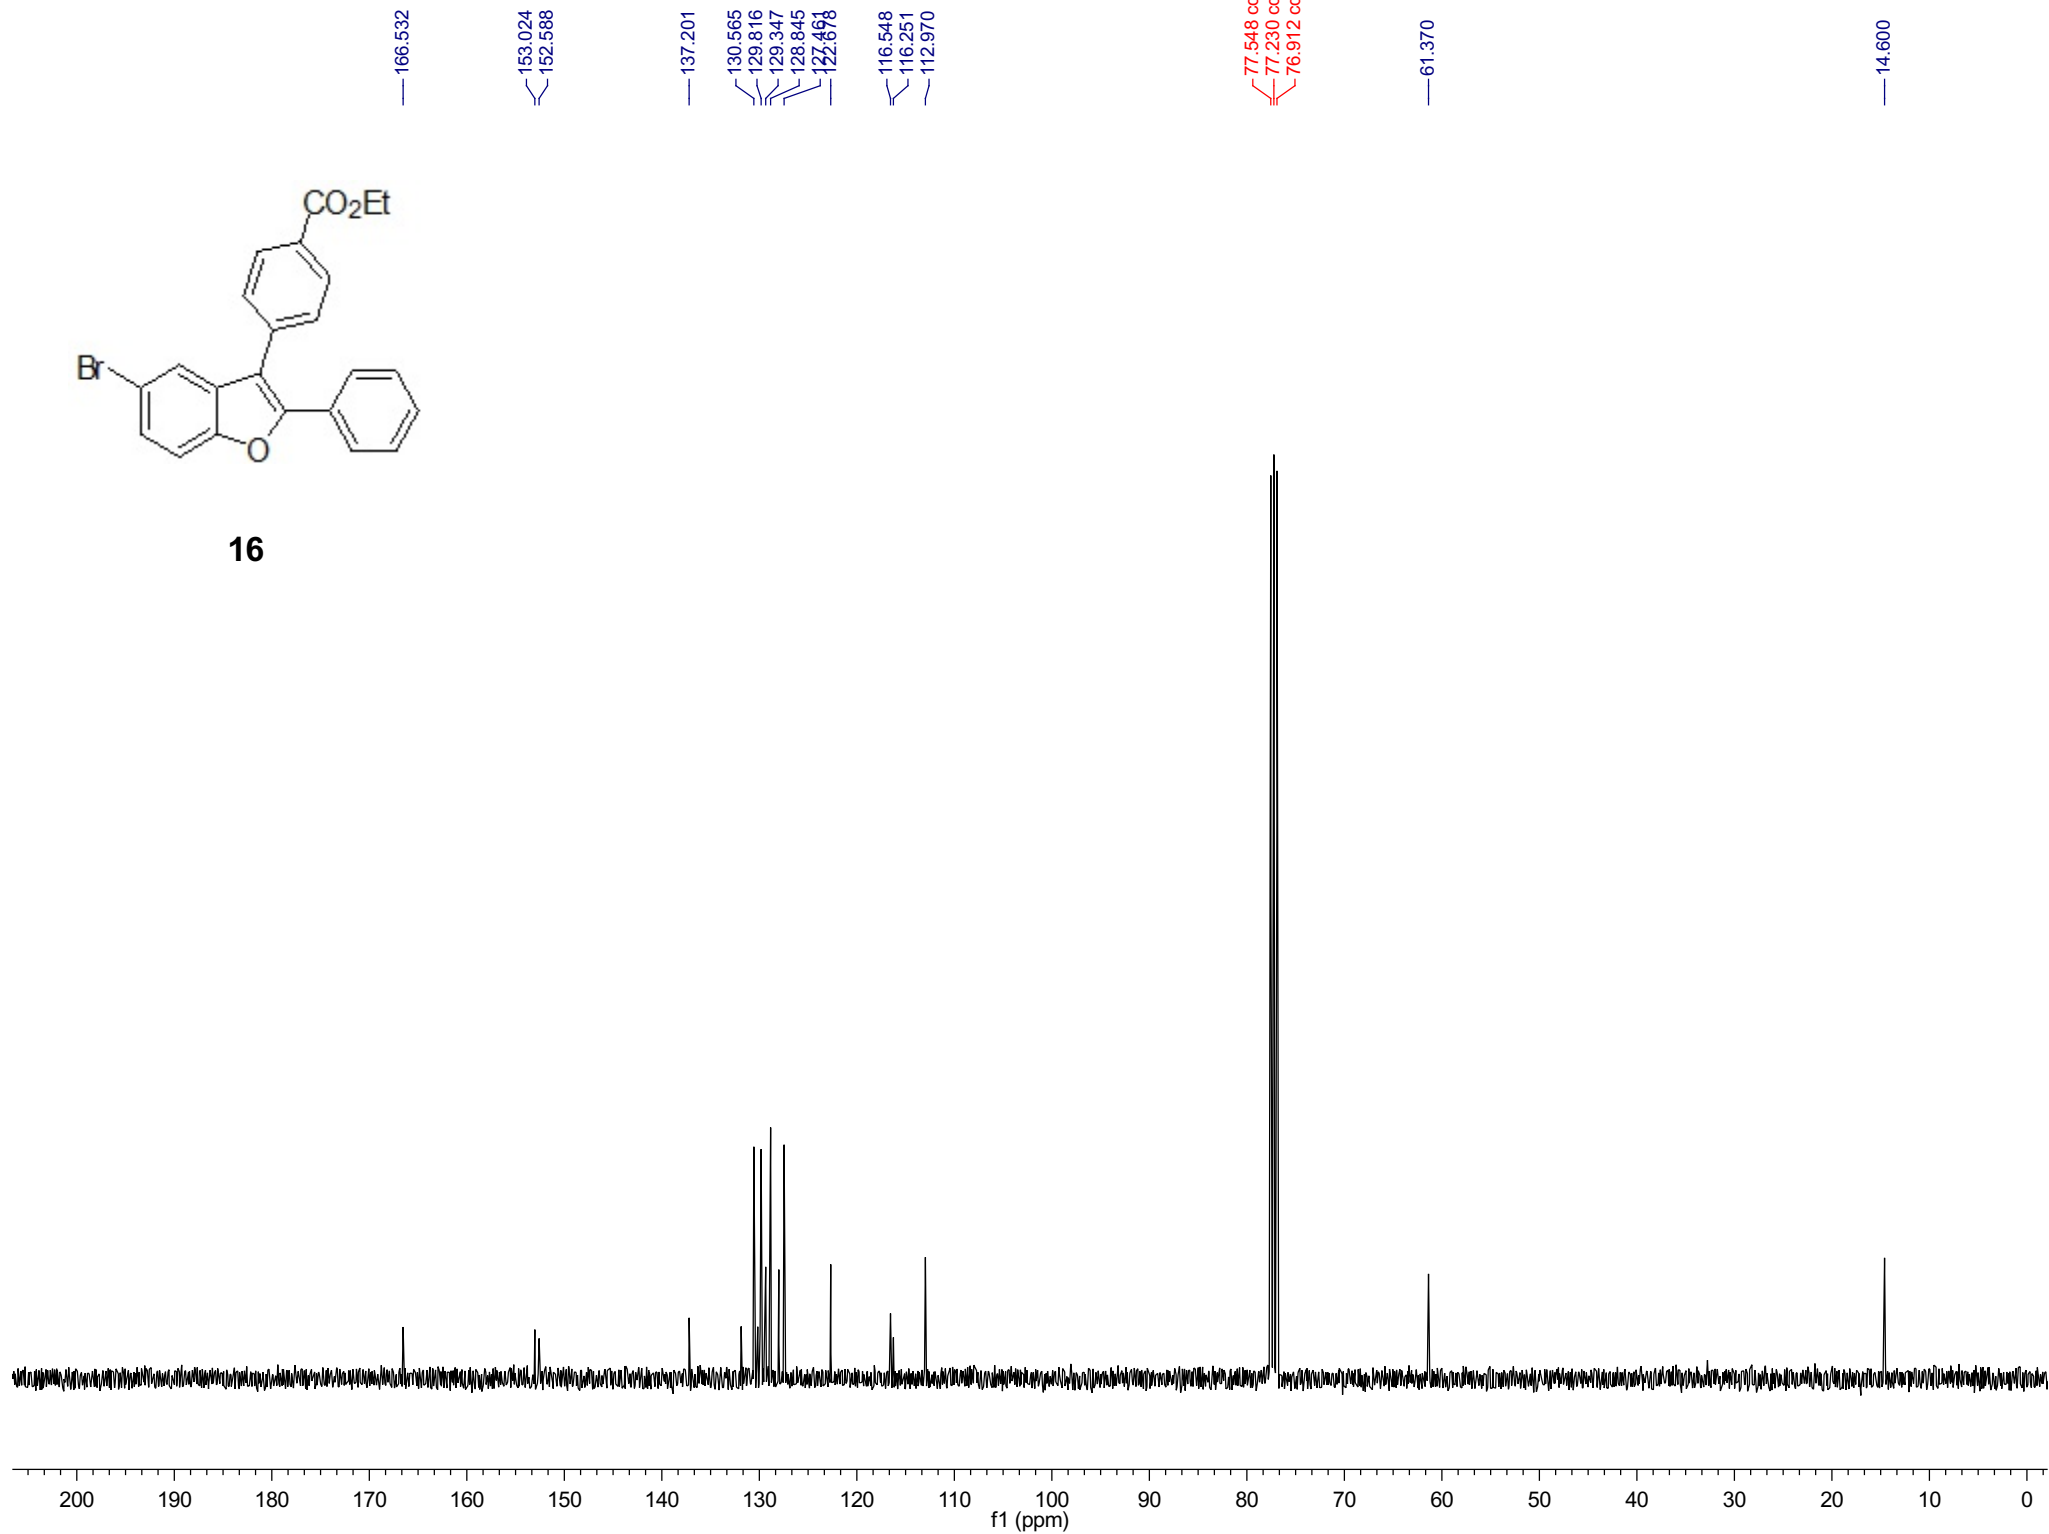

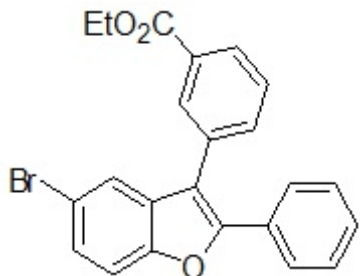

17

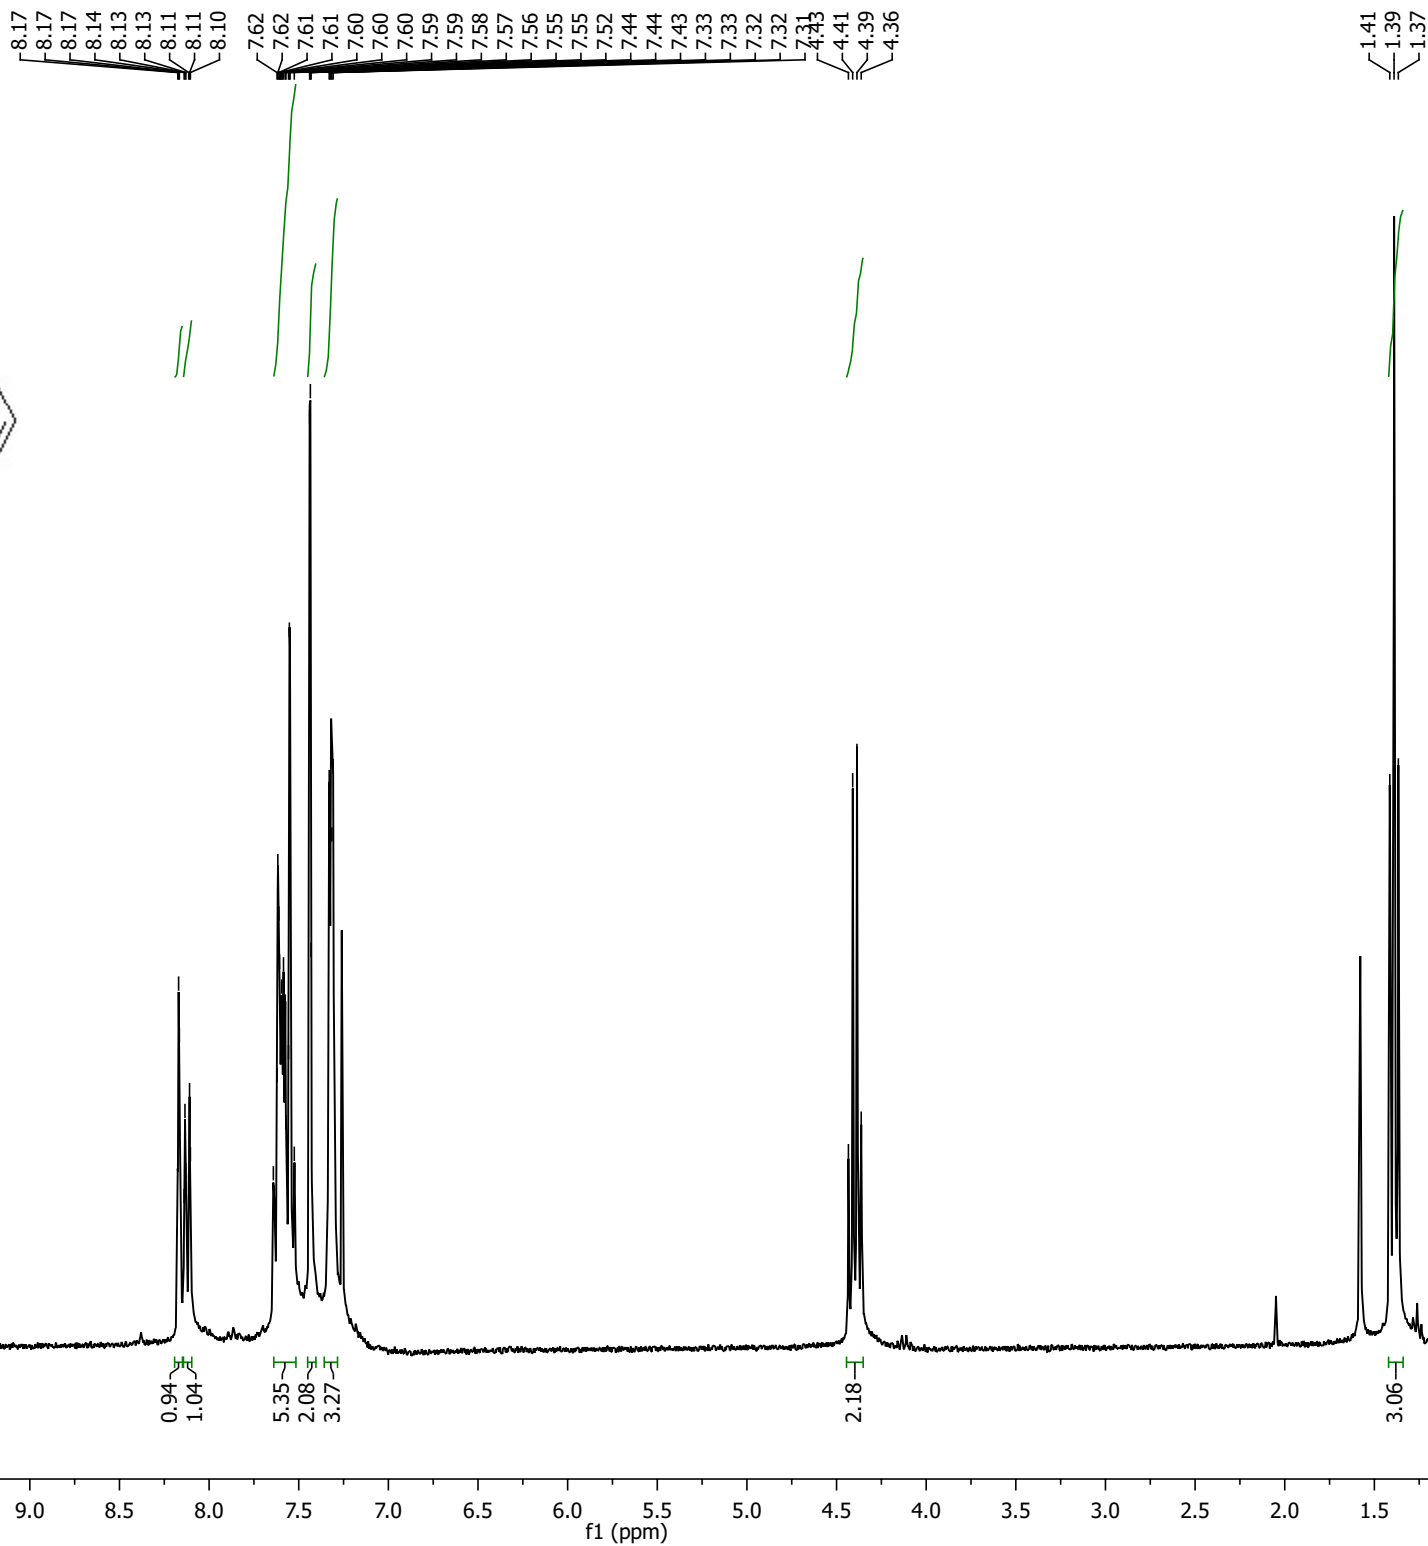

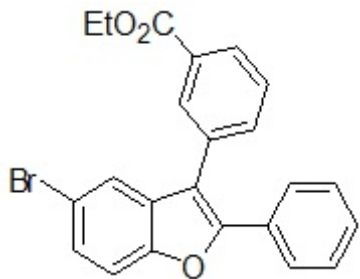

17

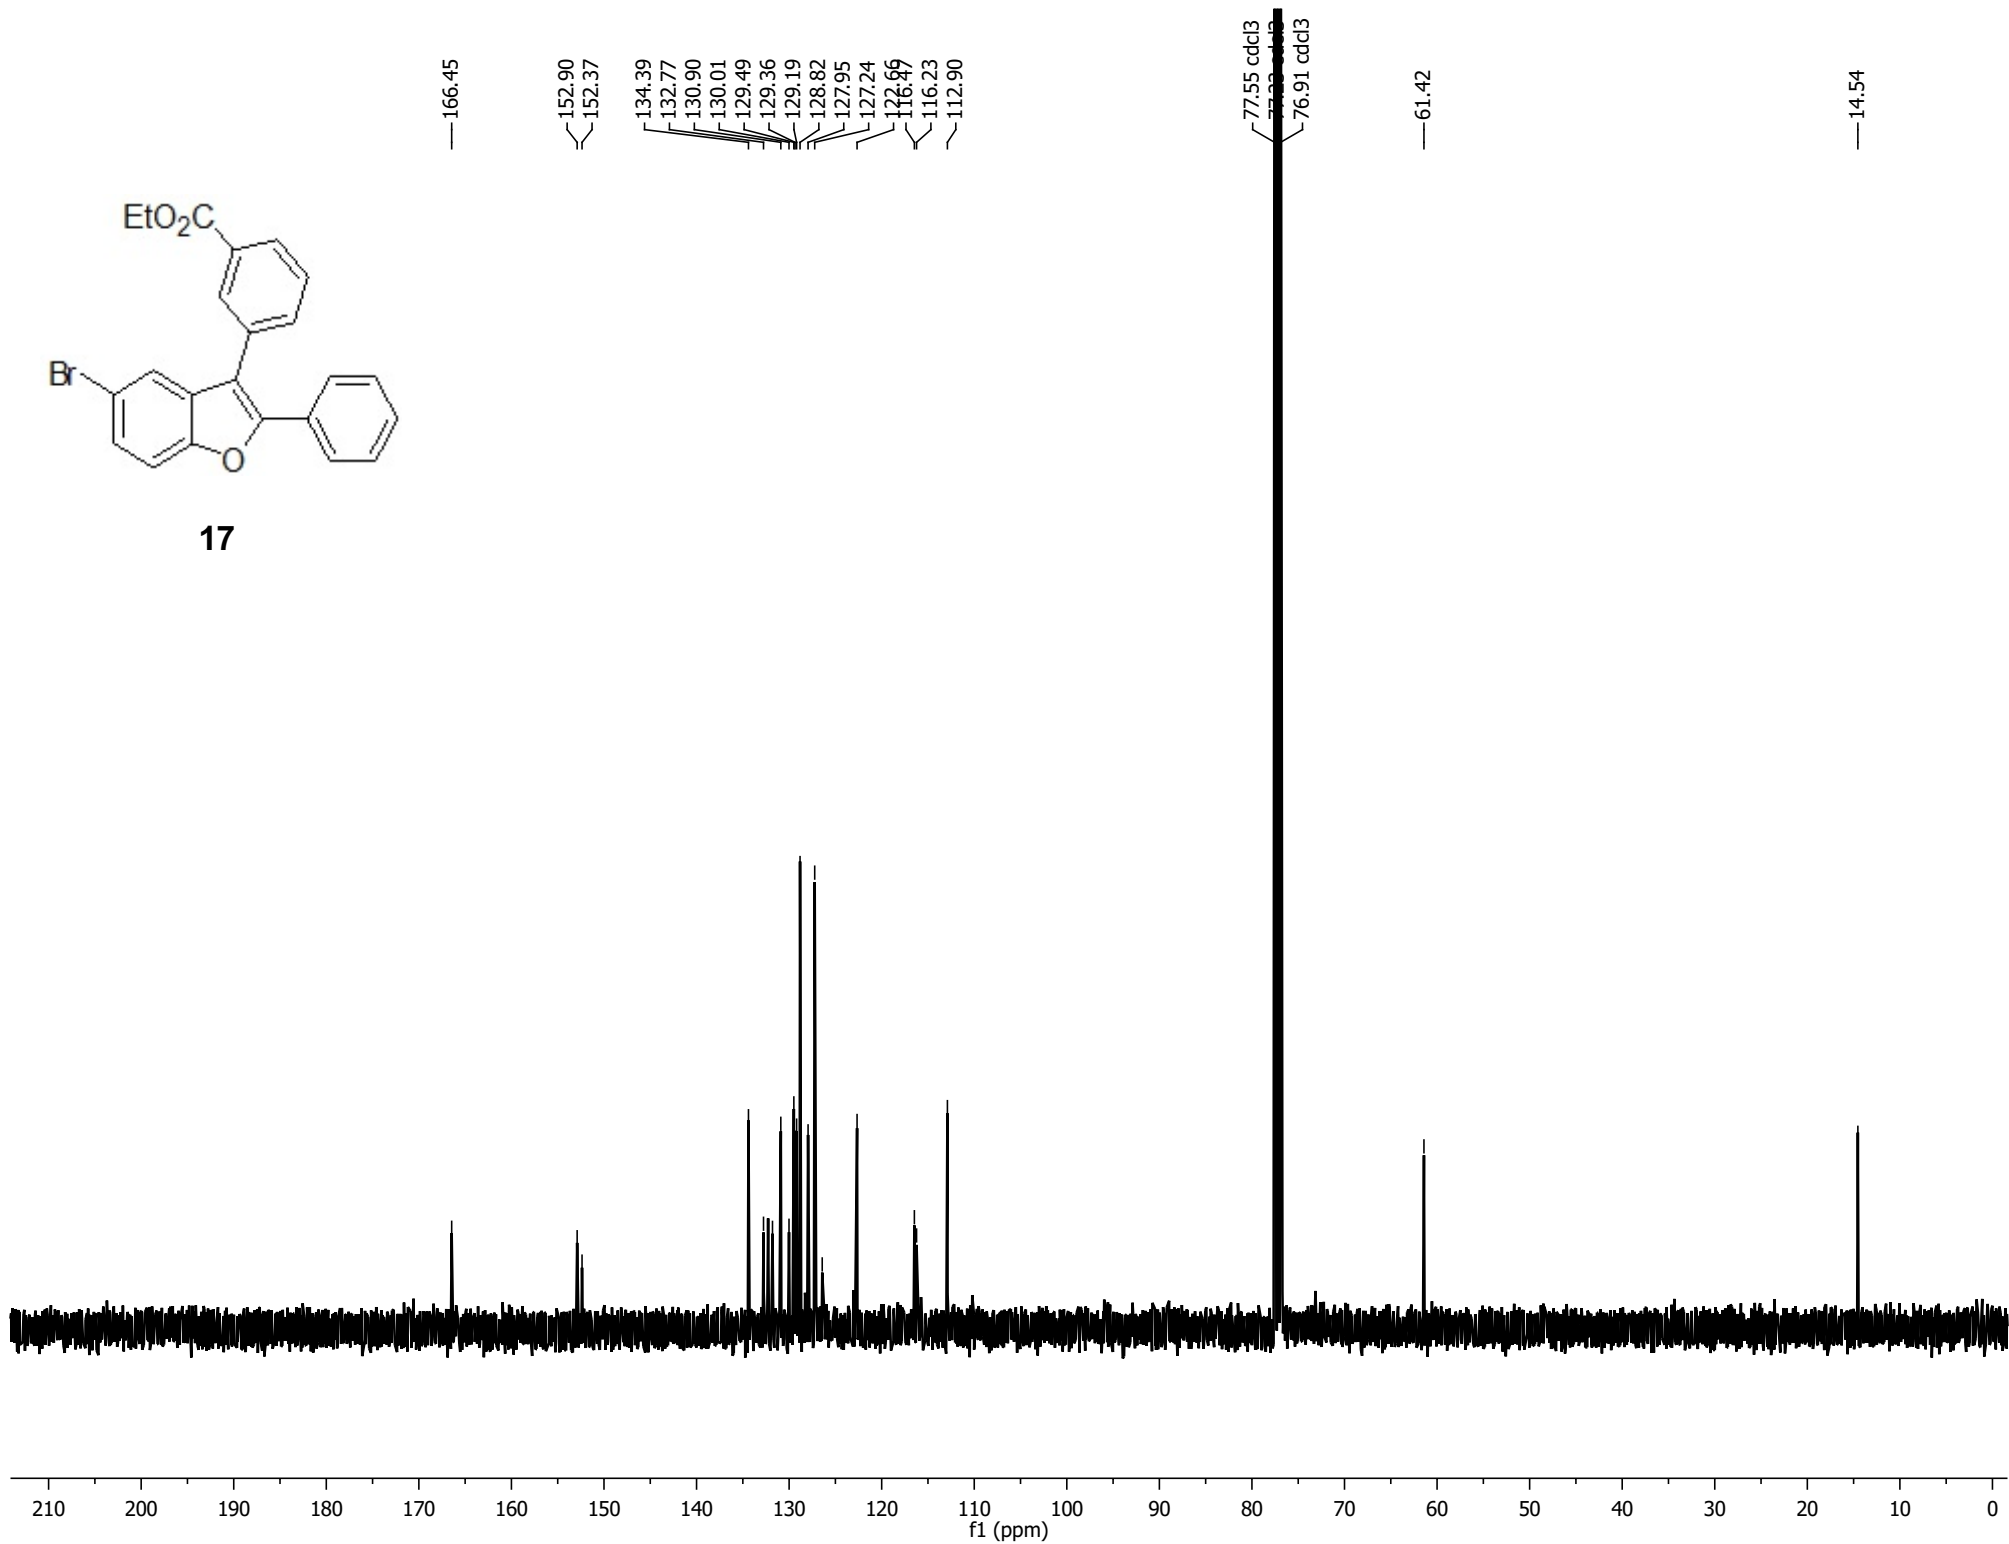

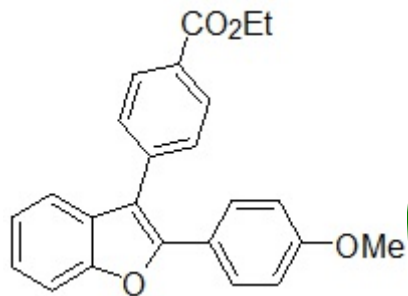

19

8.1379  
8.1173  
7.5805  
7.5581  
7.5351  
7.5090  
7.4810  
7.4618  
7.2953  
7.2708  
6.8408  
6.8188

4.4371  
4.4194  
4.4016  
4.3838

3.7780

1.4315  
1.4137  
1.3959

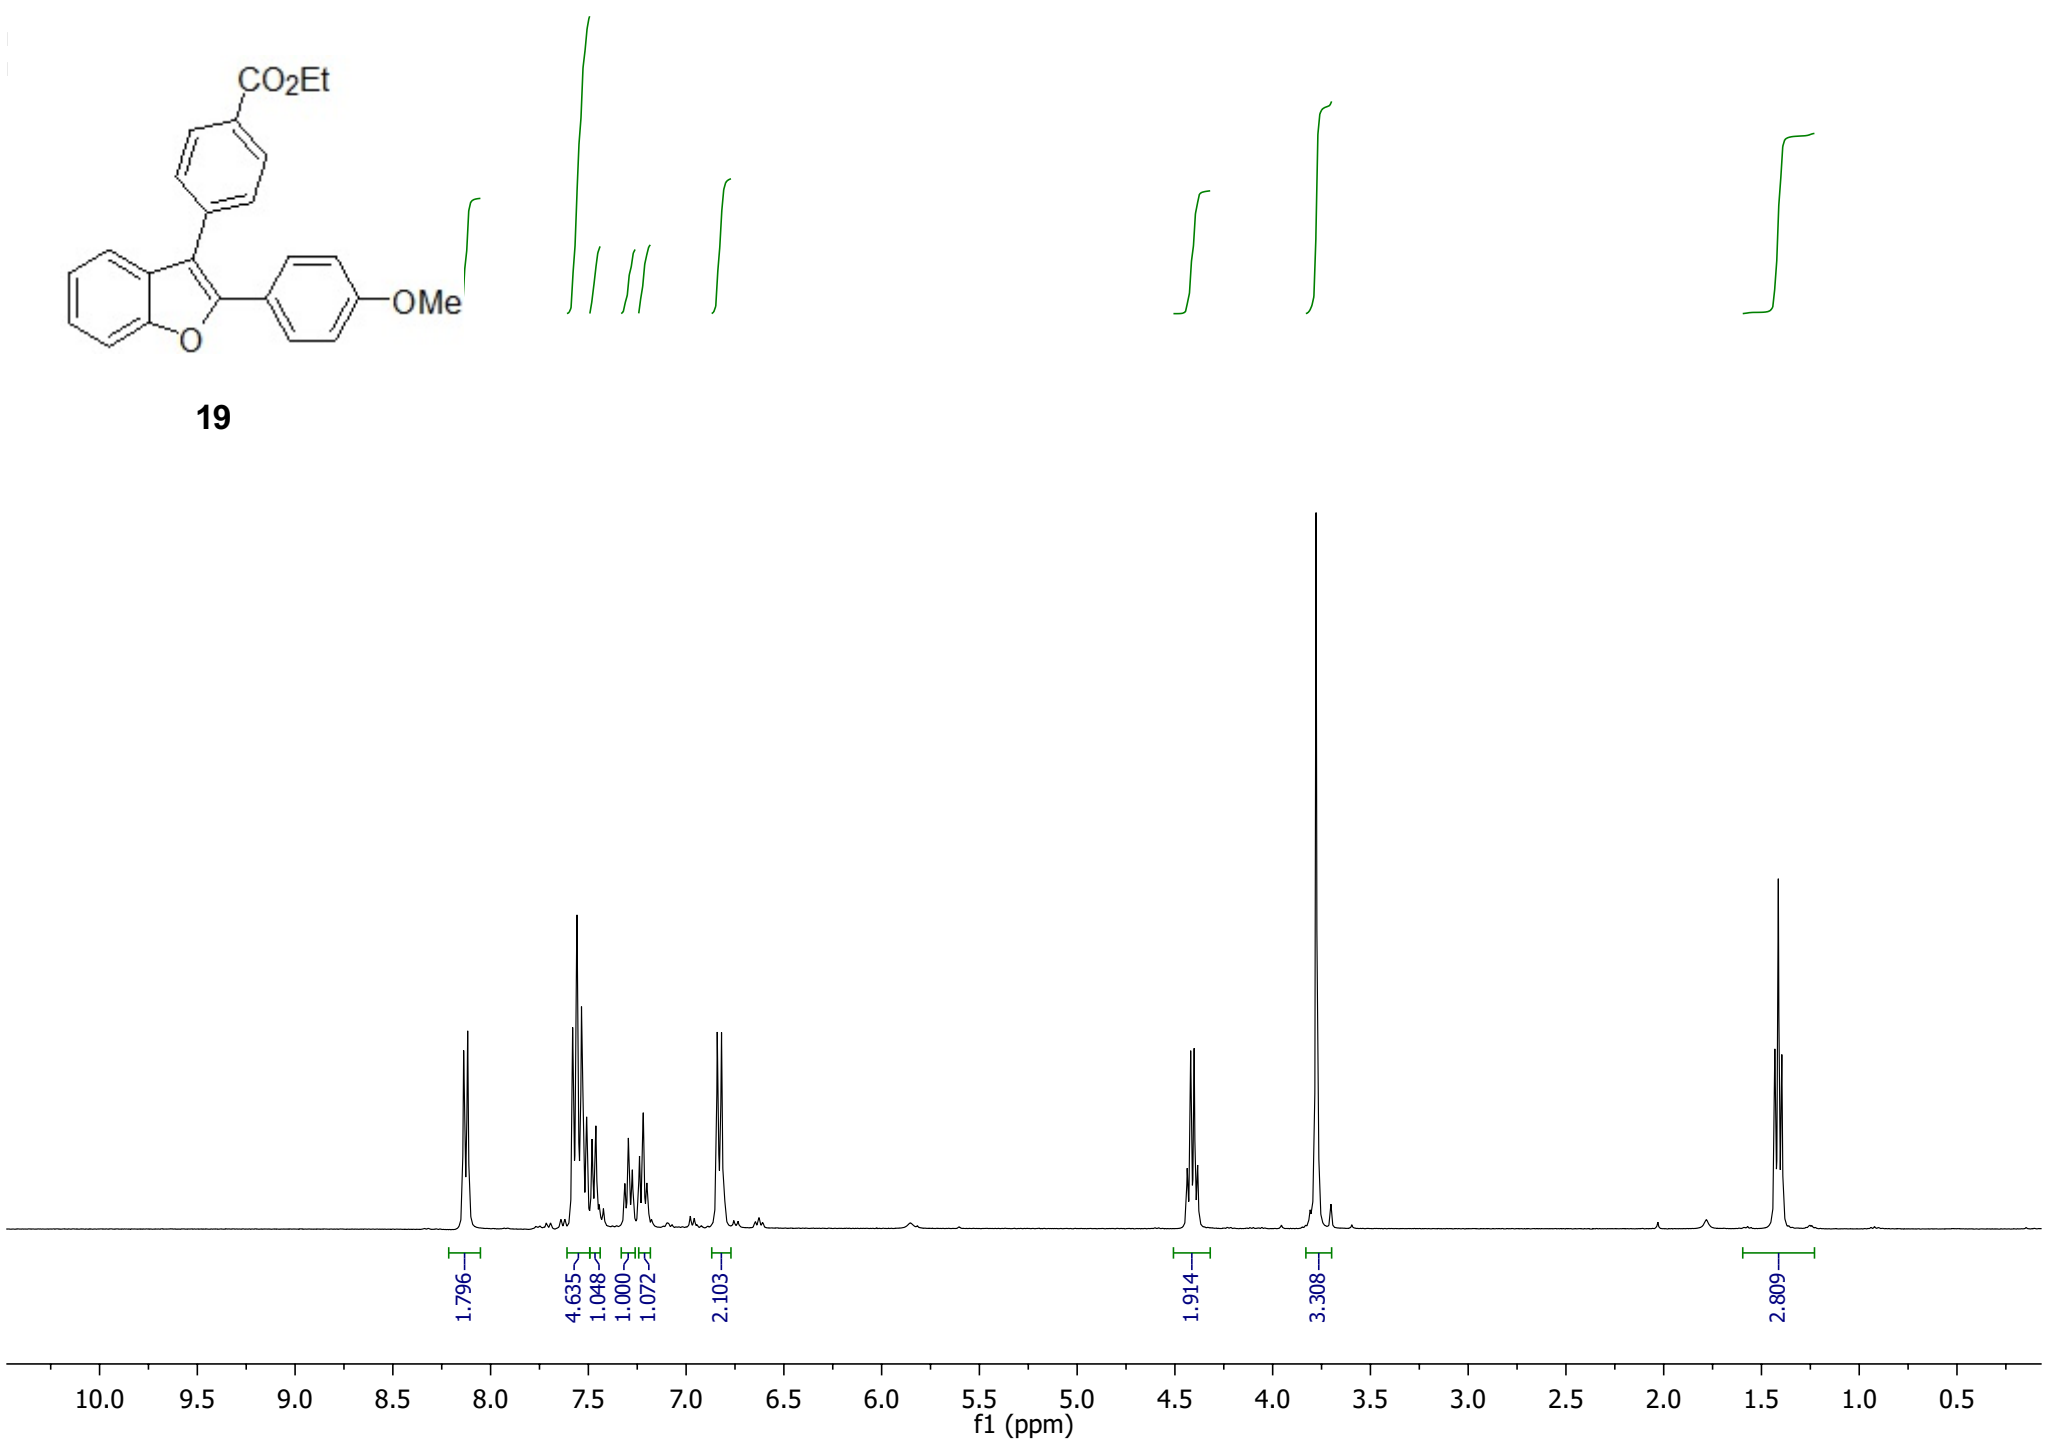

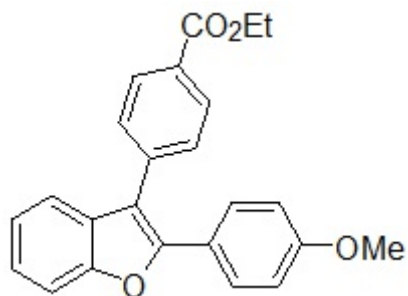

19

— 166.5728

— 160.1133

— 154.0505

— 151.5385

— 138.2204

— 134.1355

— 130.3021

— 129.7872

— 129.5138

— 128.8536

— 124.6206

— 123.2009

— 122.9151

— 119.5923

— 115.2160

— 114.1609

— 111.2353

— 77.5473 CDCl<sub>3</sub>

— 77.2299 CDCl<sub>3</sub>

— 76.9127 CDCl<sub>3</sub>

— 61.2088

— 55.3888

— 14.5517

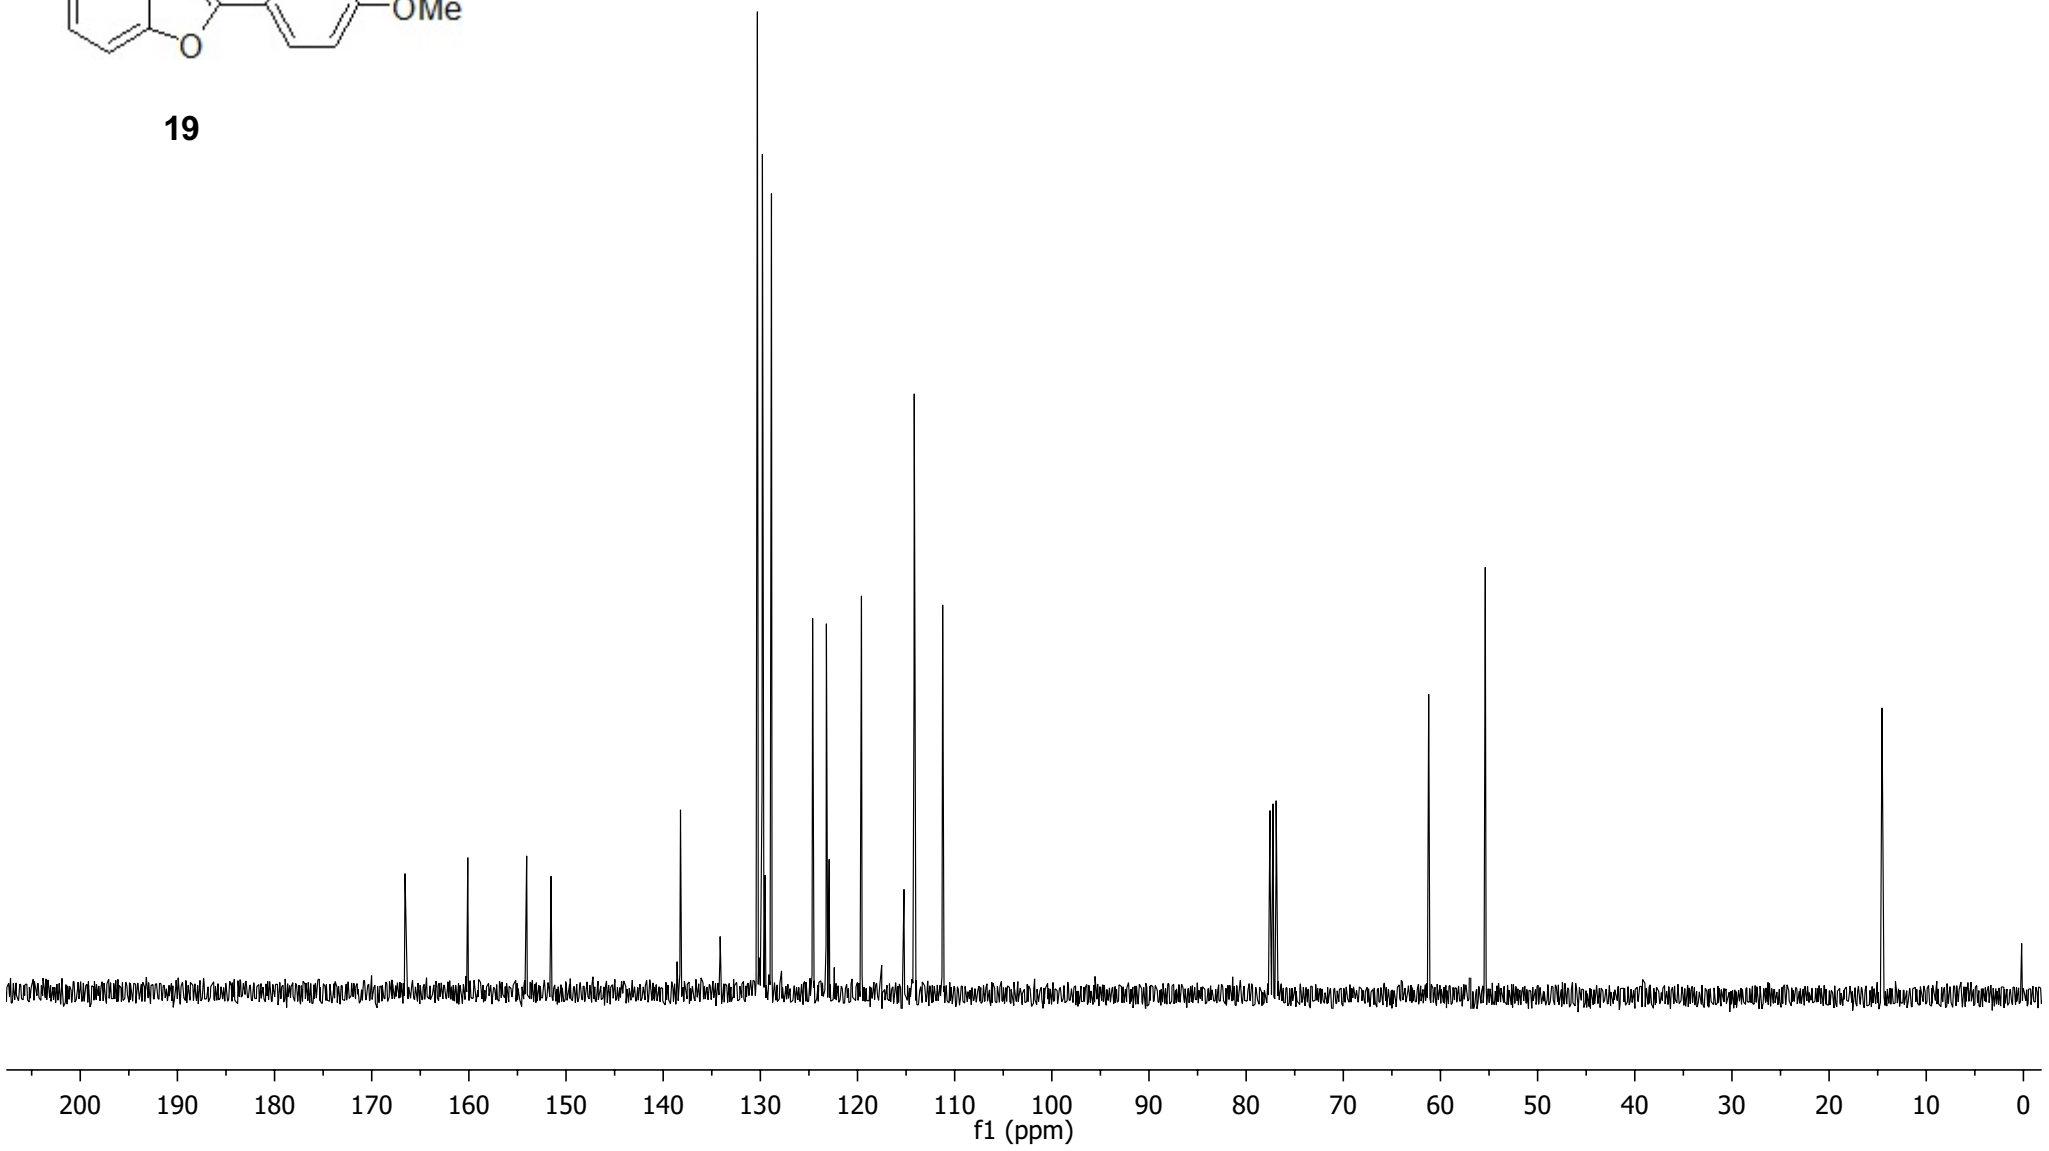

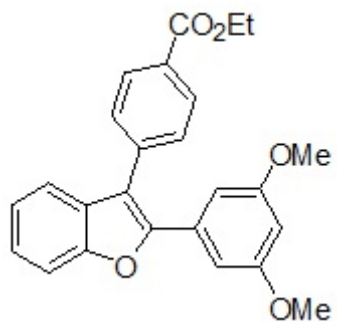

21

8.19  
8.18  
8.17  
8.16  
7.64  
7.62  
7.59  
7.57  
7.48  
7.37  
7.31  
6.45

4.47  
4.45  
4.43  
4.42

3.70

1.47  
1.45  
1.43

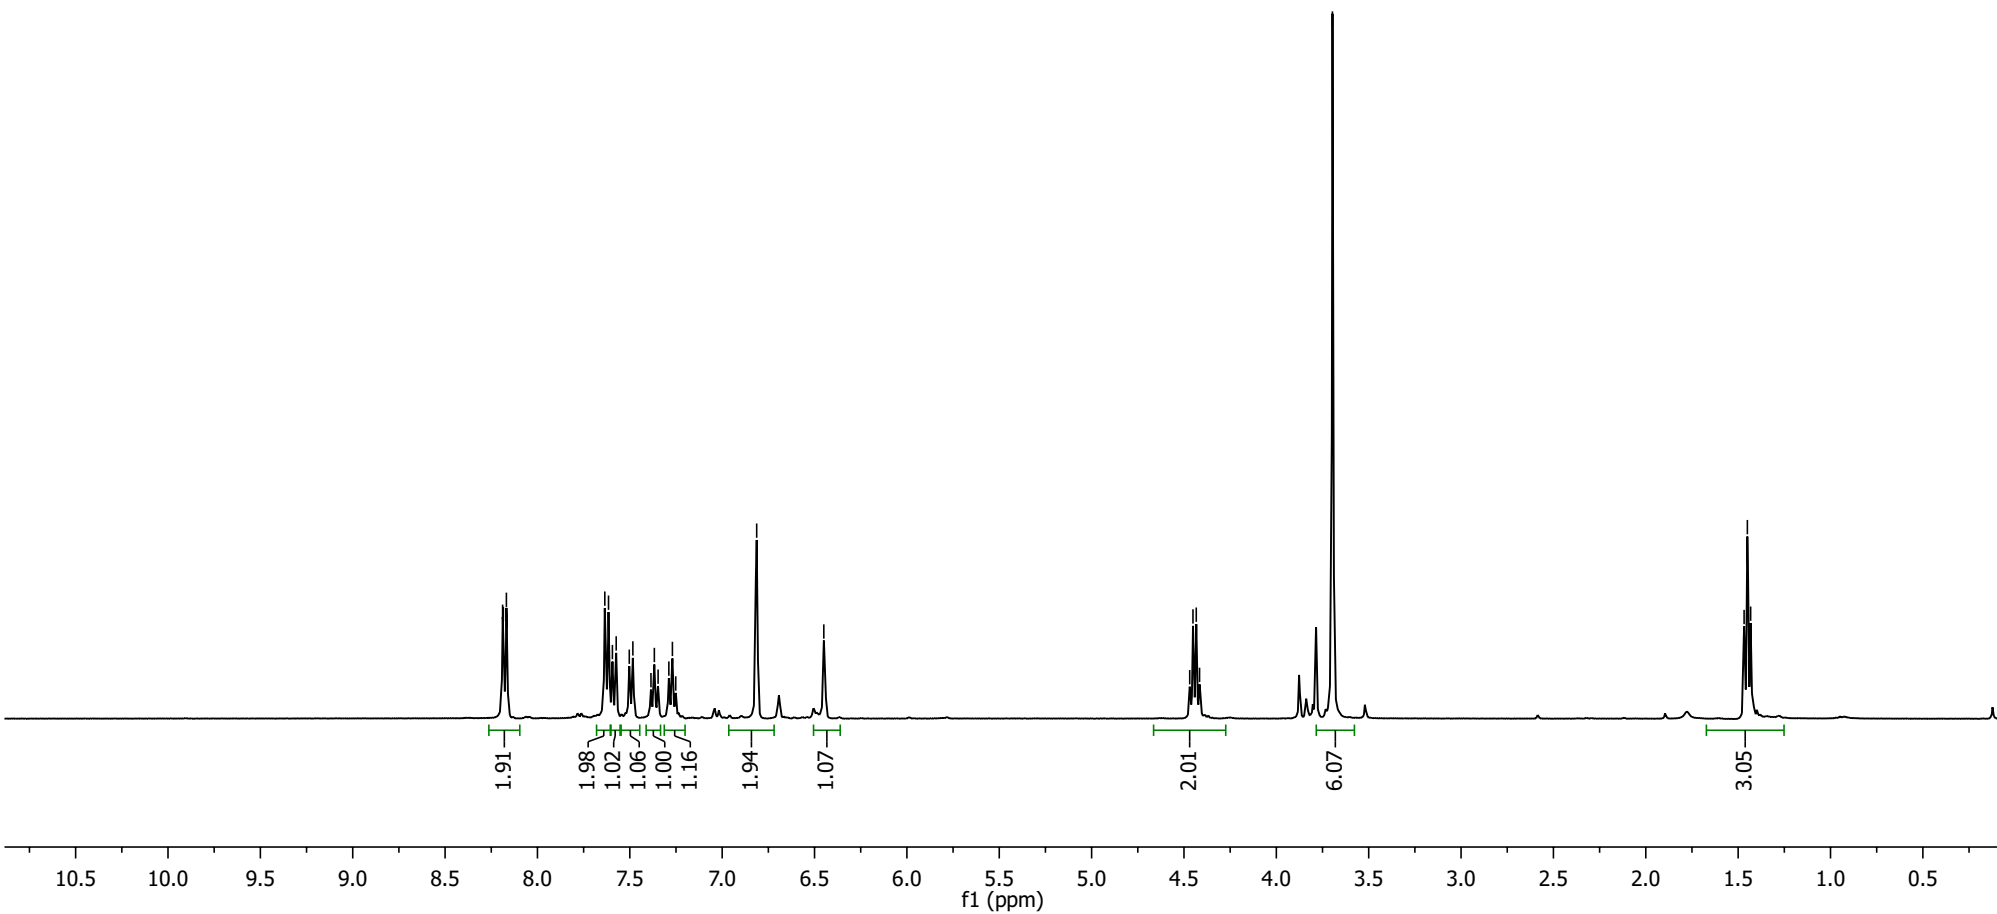



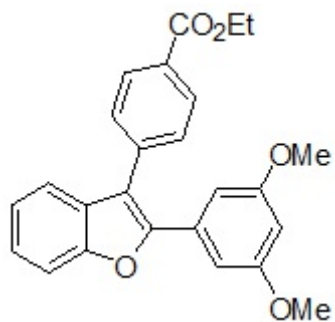

21

— 166.53

— 160.83

— 154.04

— 150.96

— 137.92

— 131.93

— 130.26

— 129.99

— 129.75

— 125.20

— 123.34

— 119.94

— 117.10

— 111.41

— 105.22

— 101.59

— 101.56

— 77.55 CDCl<sub>3</sub>

— 77.23 CDCl<sub>3</sub>

— 76.91 CDCl<sub>3</sub>

— 61.27

— 55.45

— 14.55

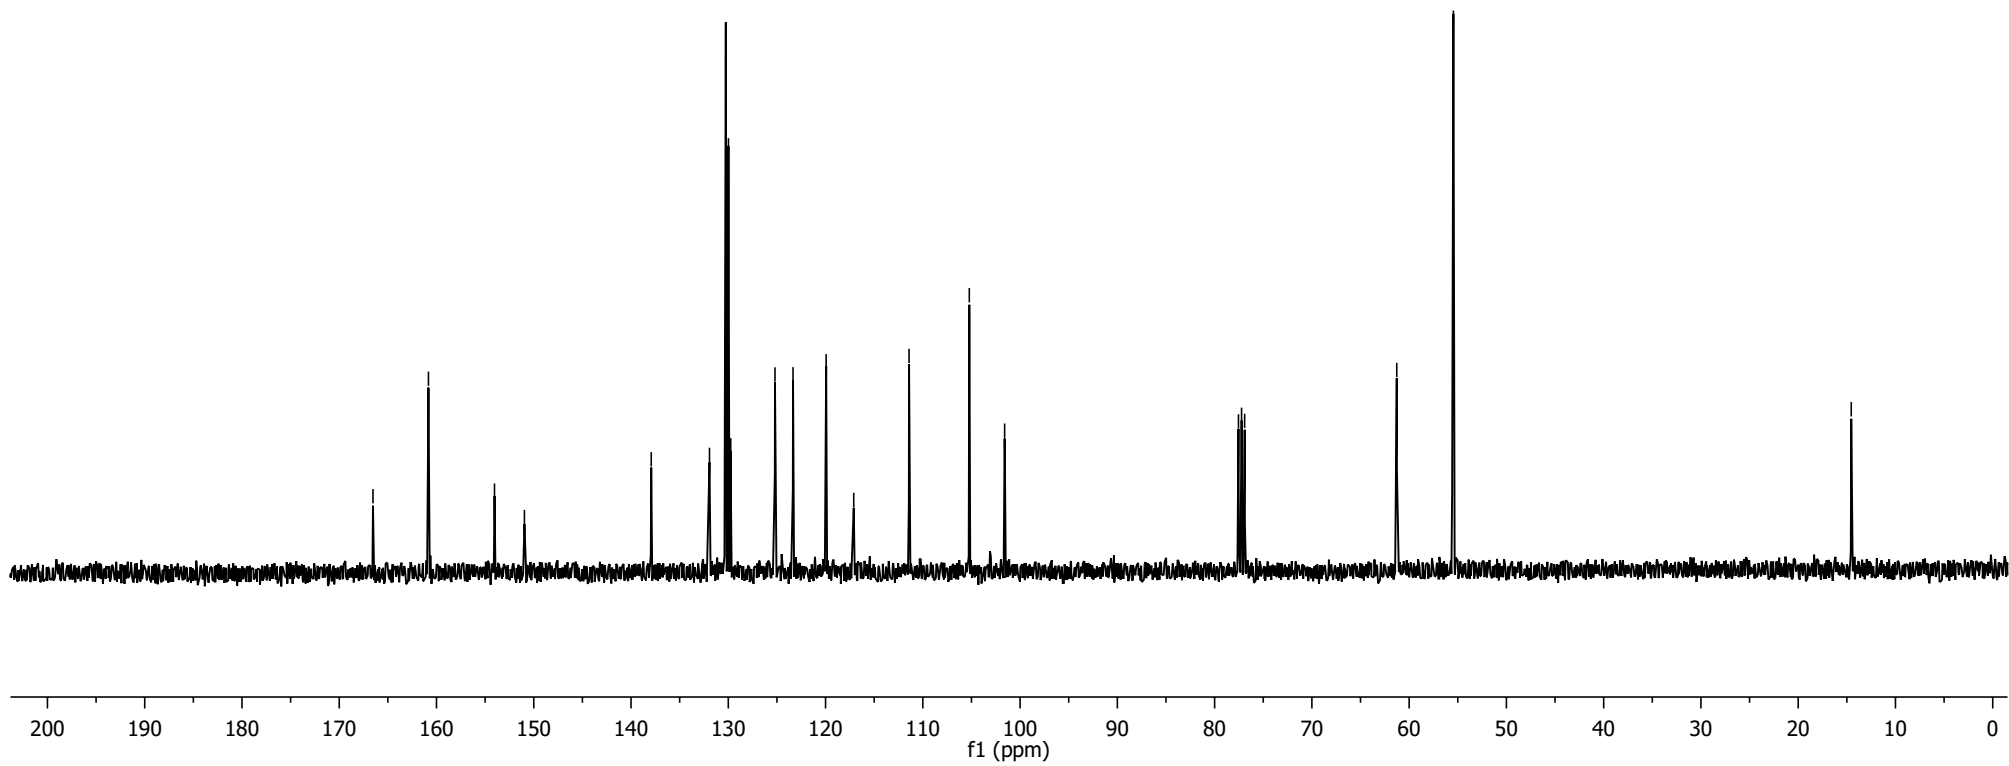

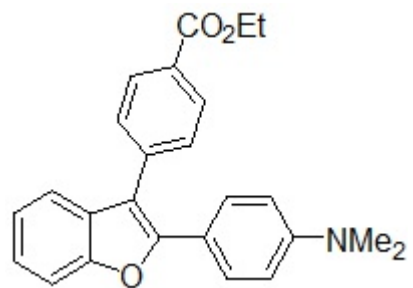

23

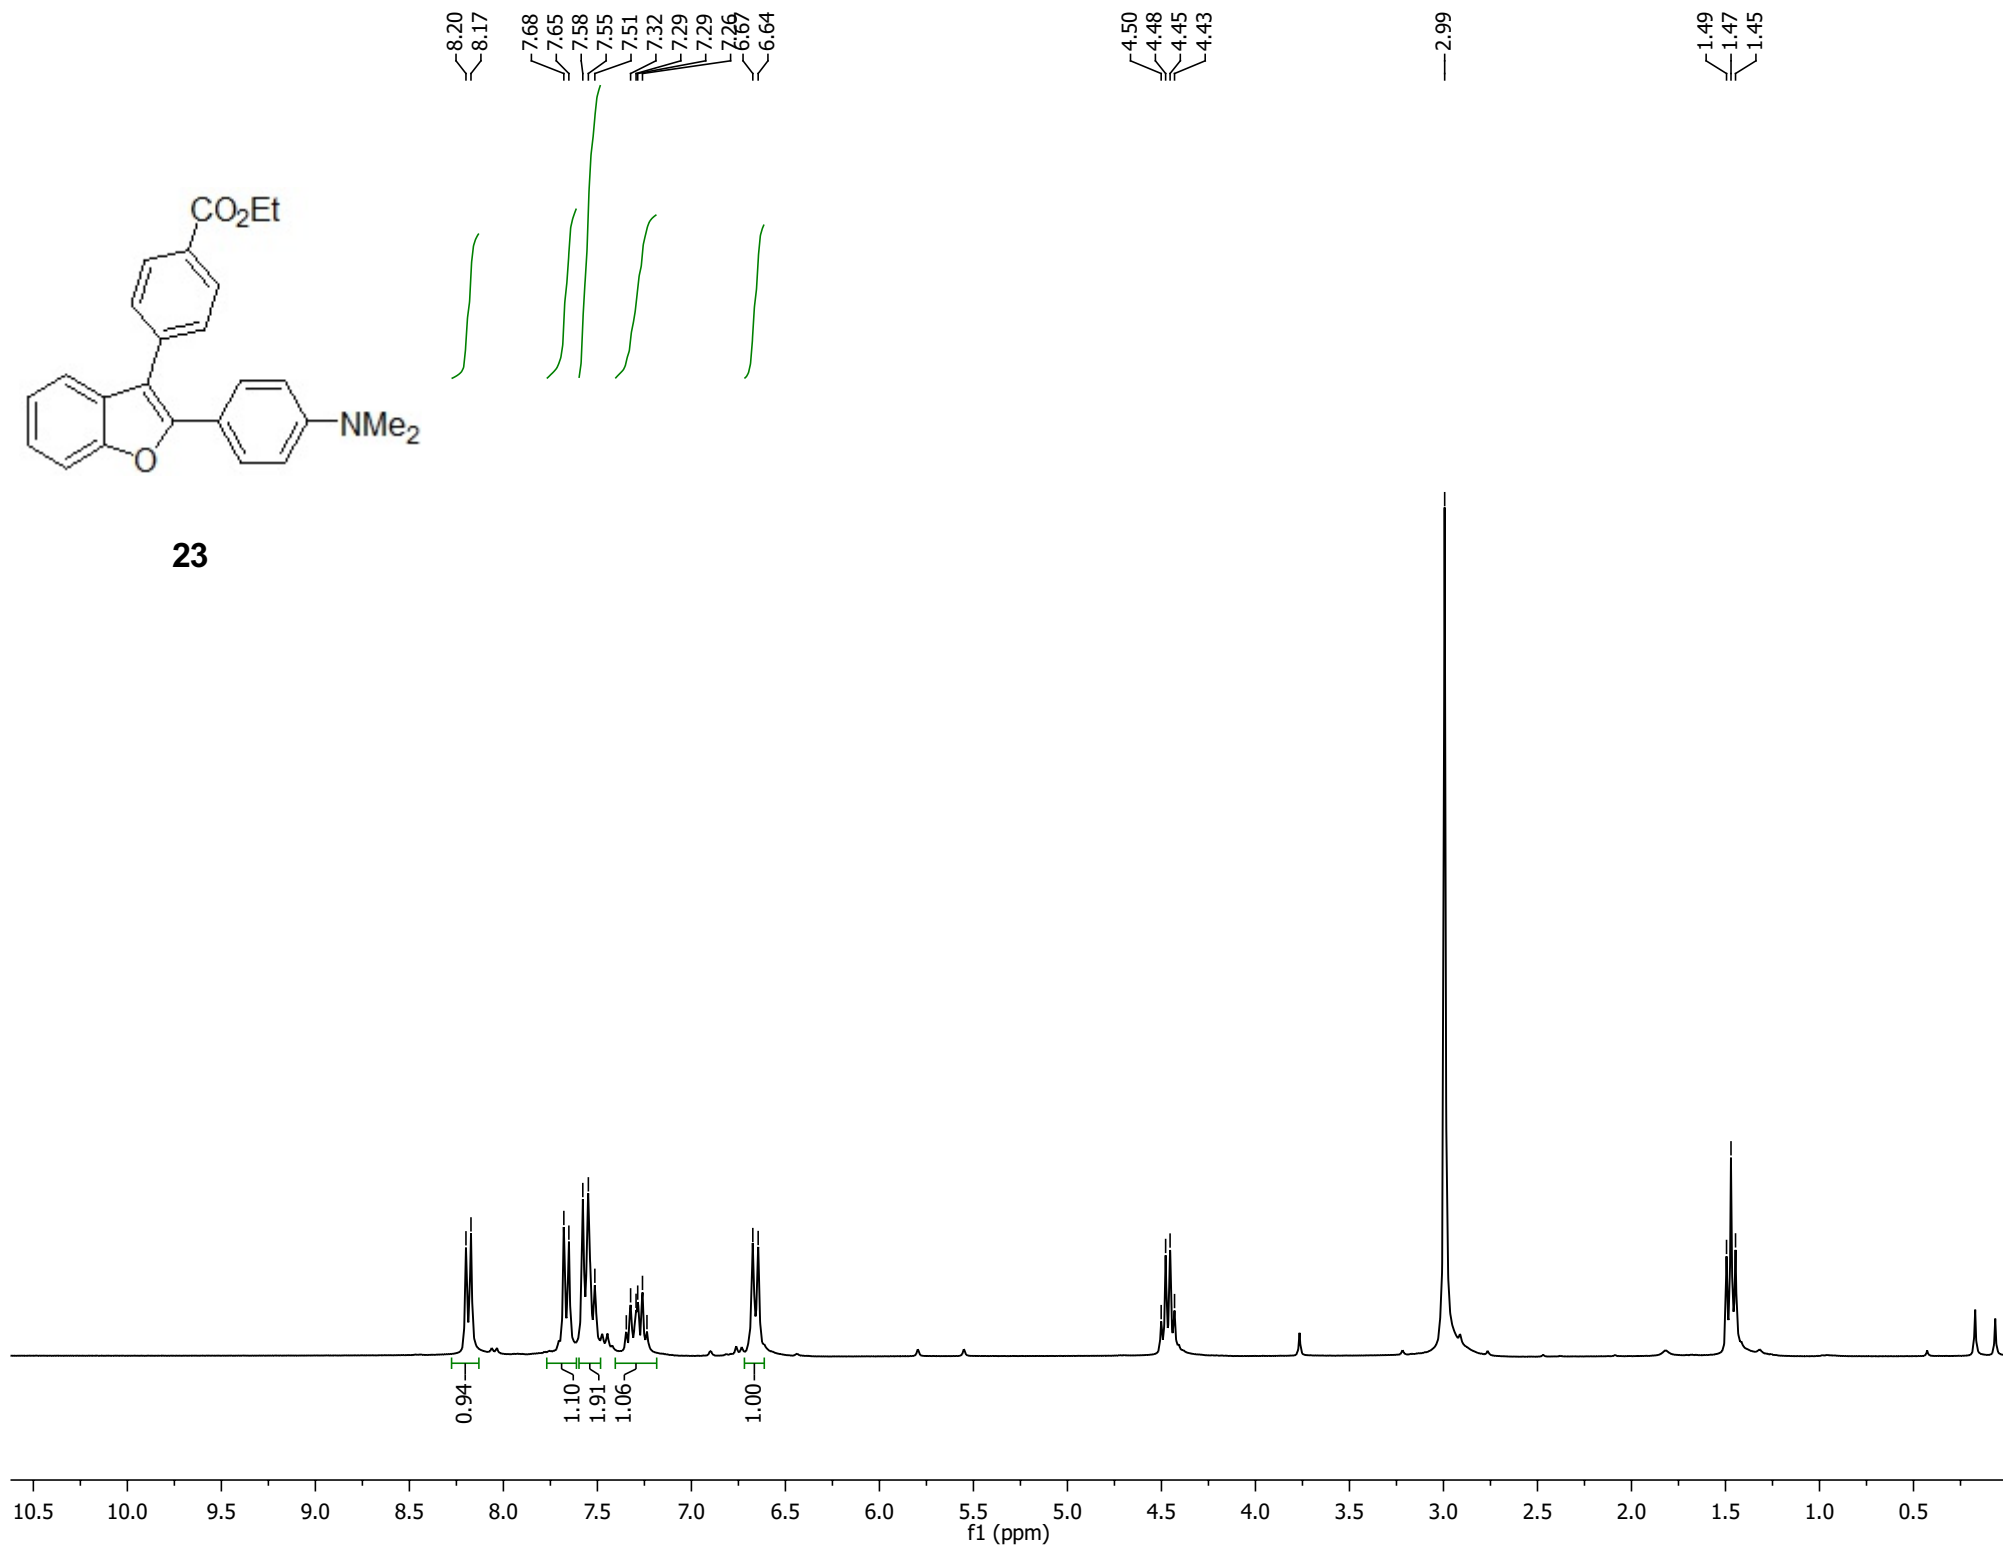

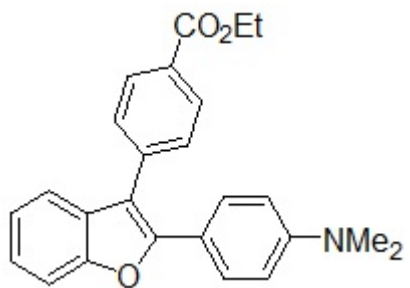

23

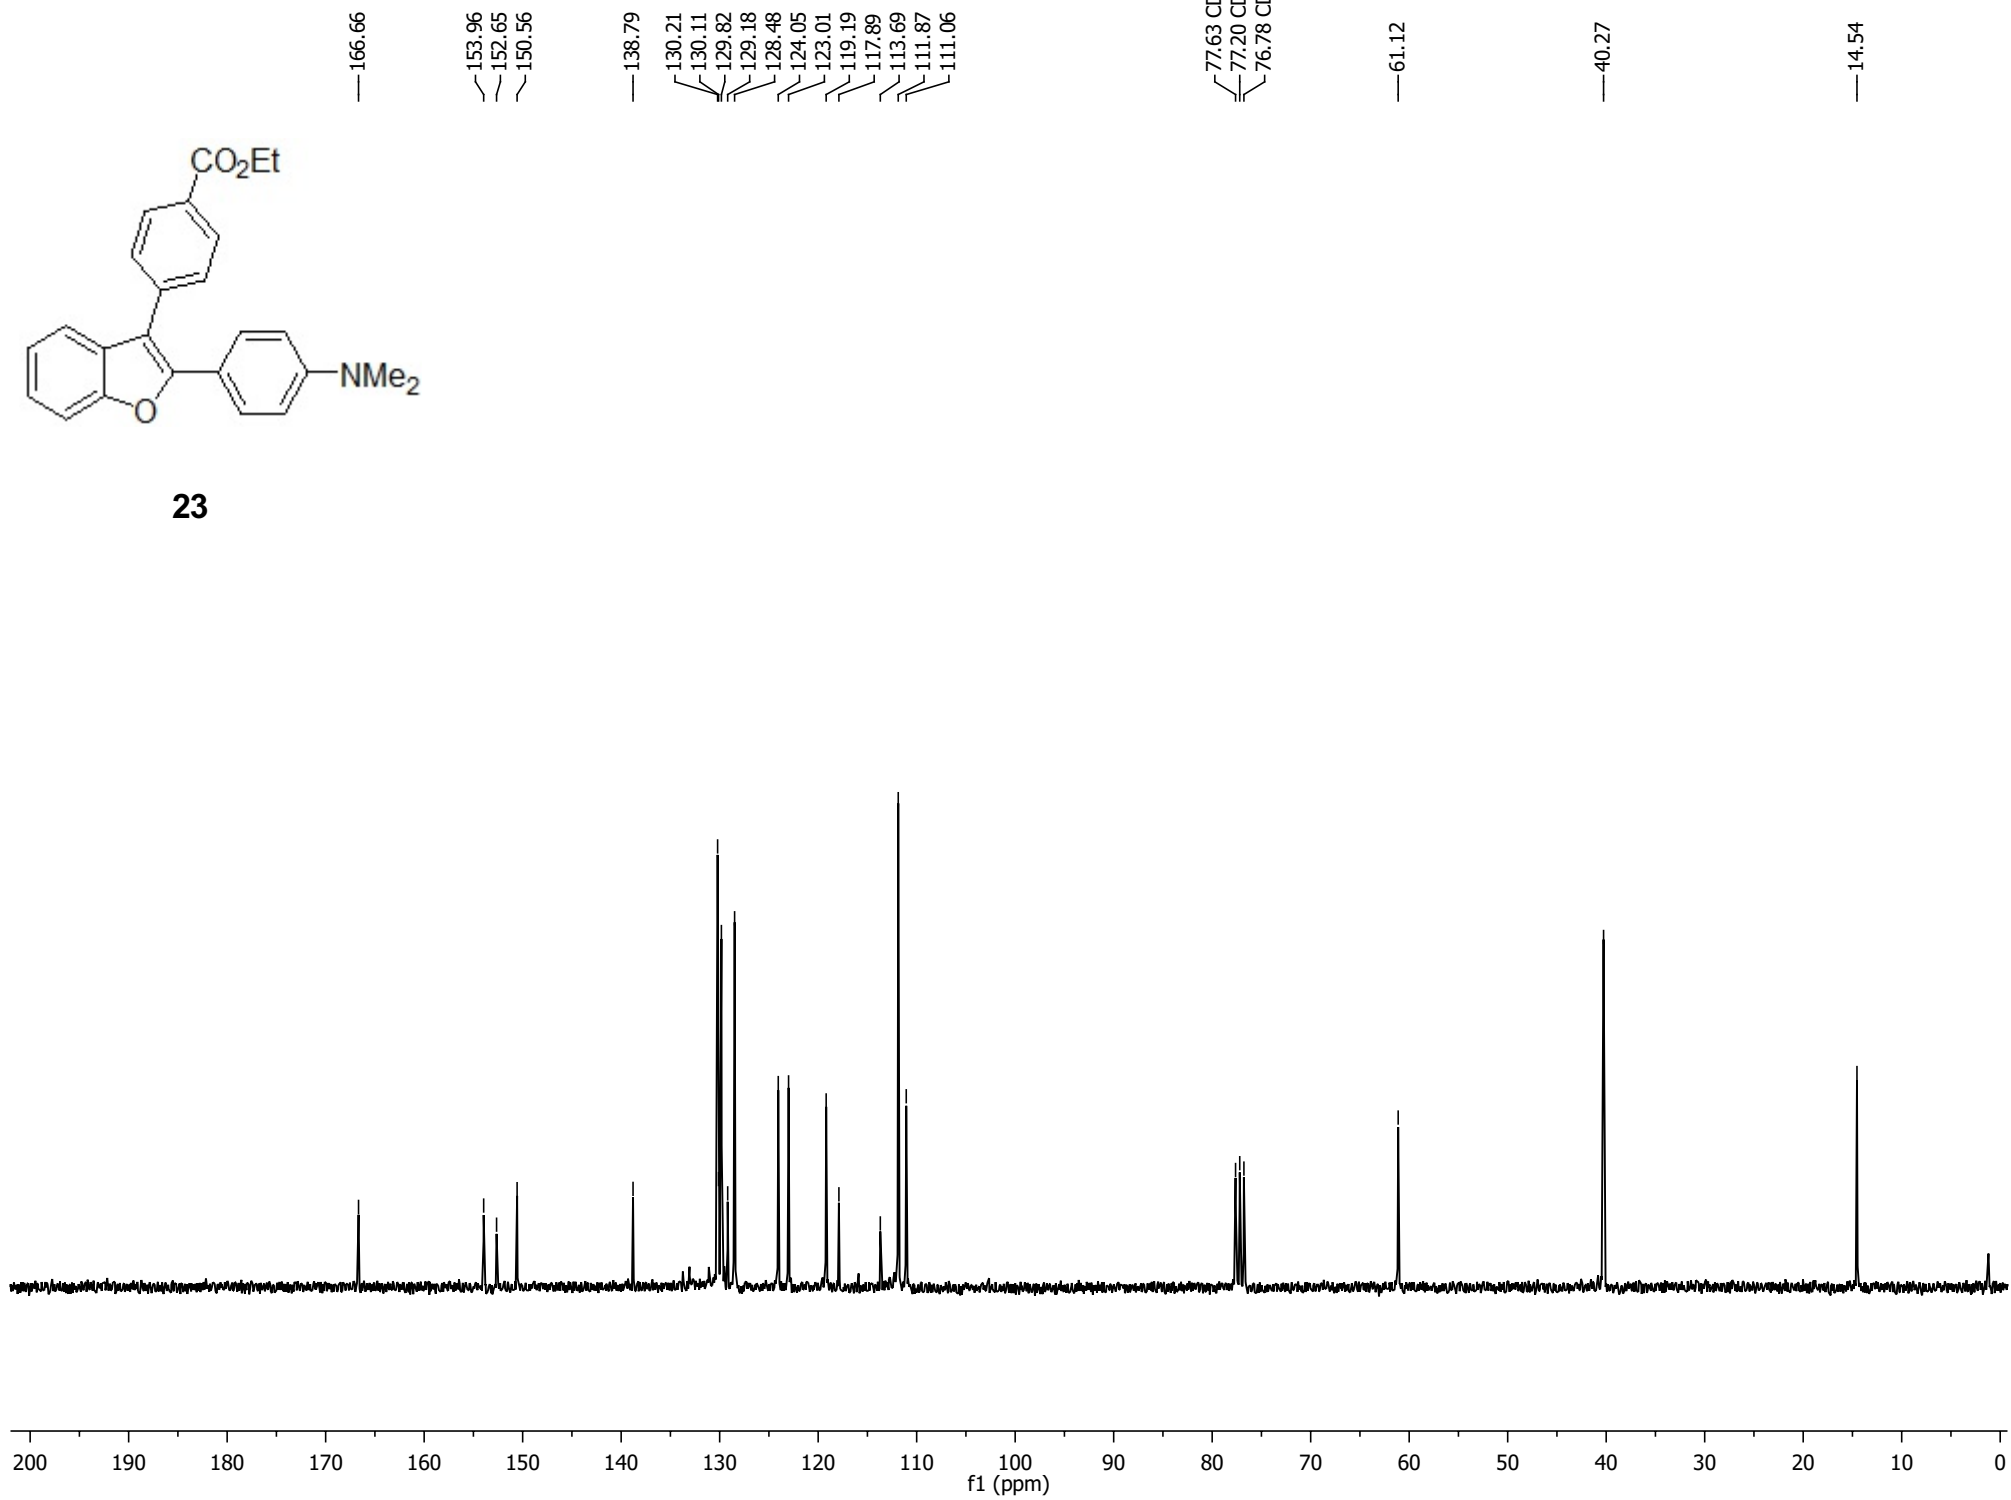

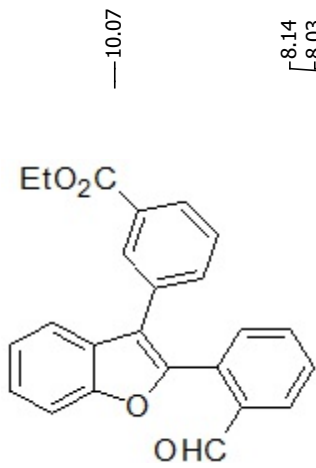

25

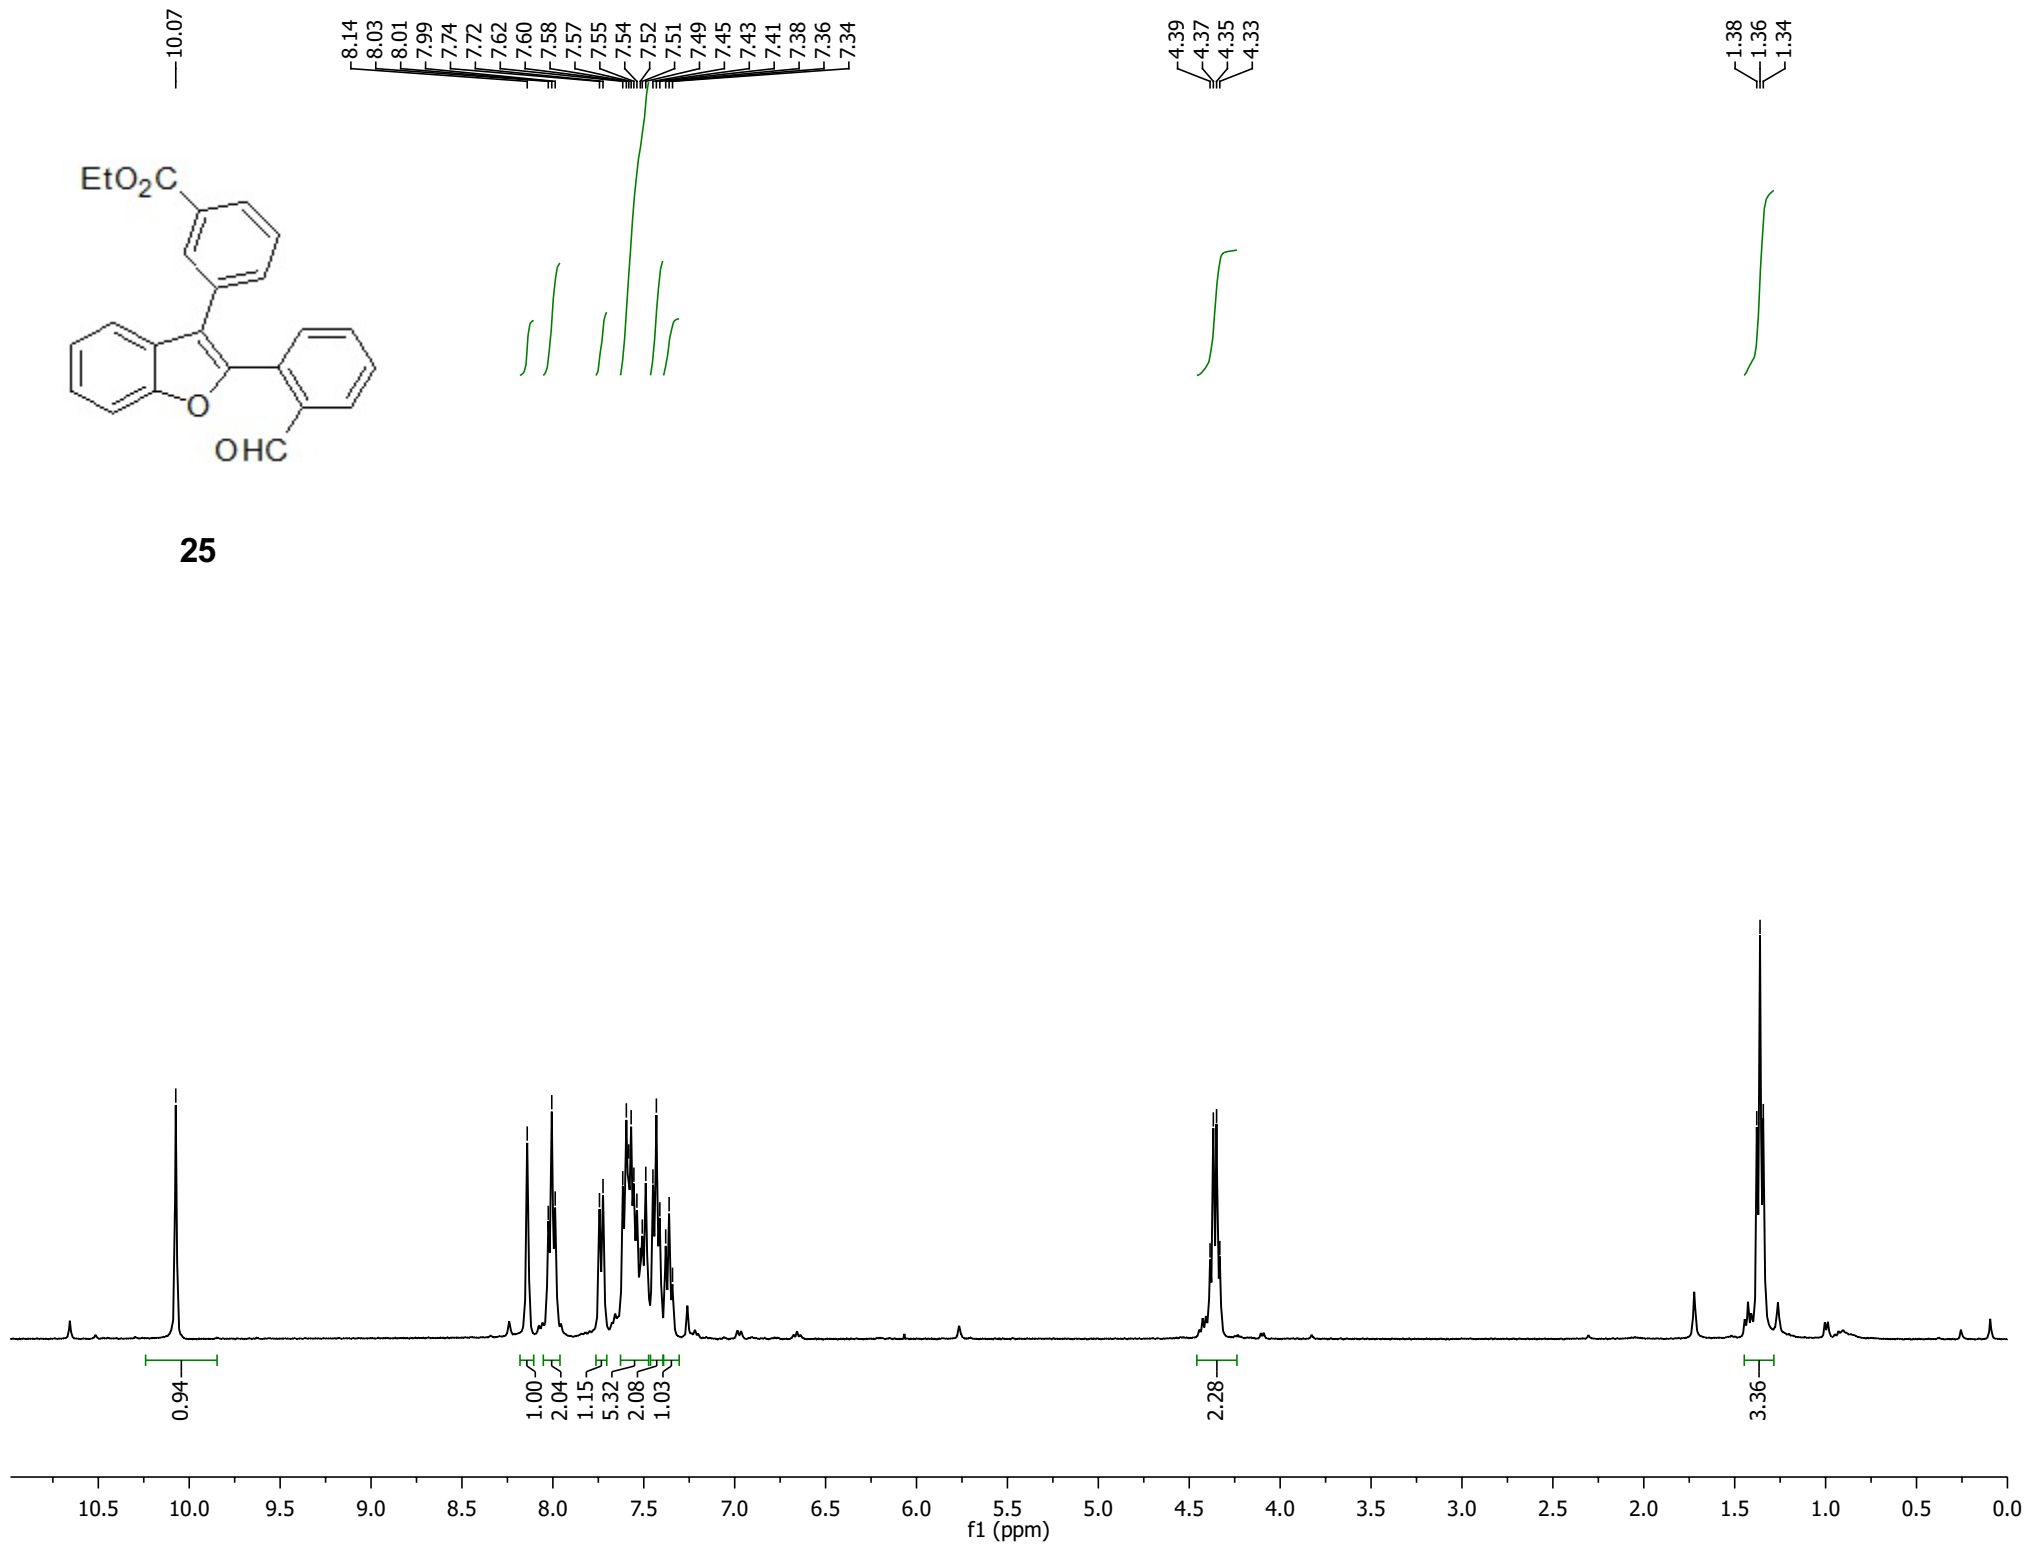

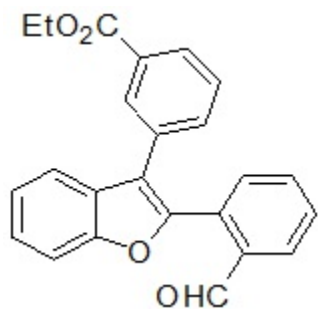

25

—191.01

—166.24

—155.09

—148.62

133.80

131.96

131.59

131.28

130.51

129.80

129.34

129.01

128.30

128.25

125.80

123.80

111.48

77.55 CDCl<sub>3</sub>

77.23 CDCl<sub>3</sub>

76.91 CDCl<sub>3</sub>

—61.30

—14.48

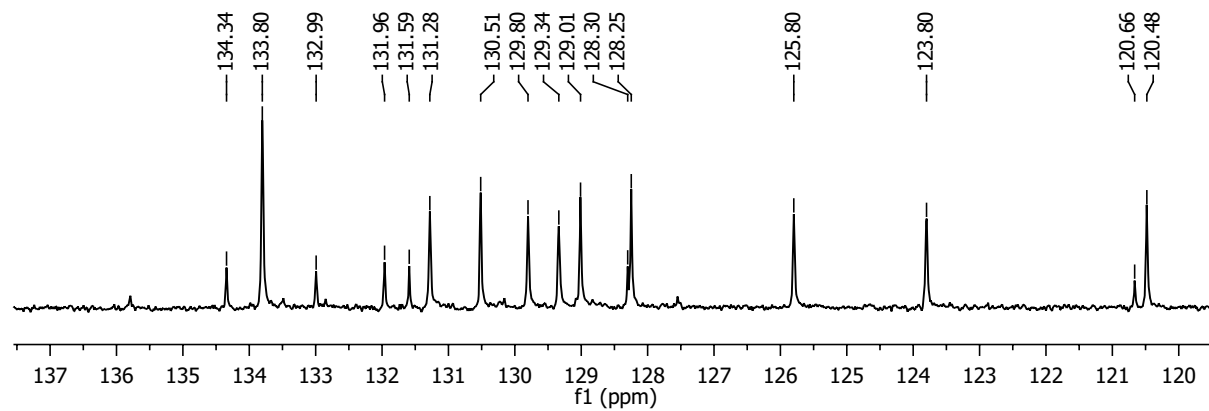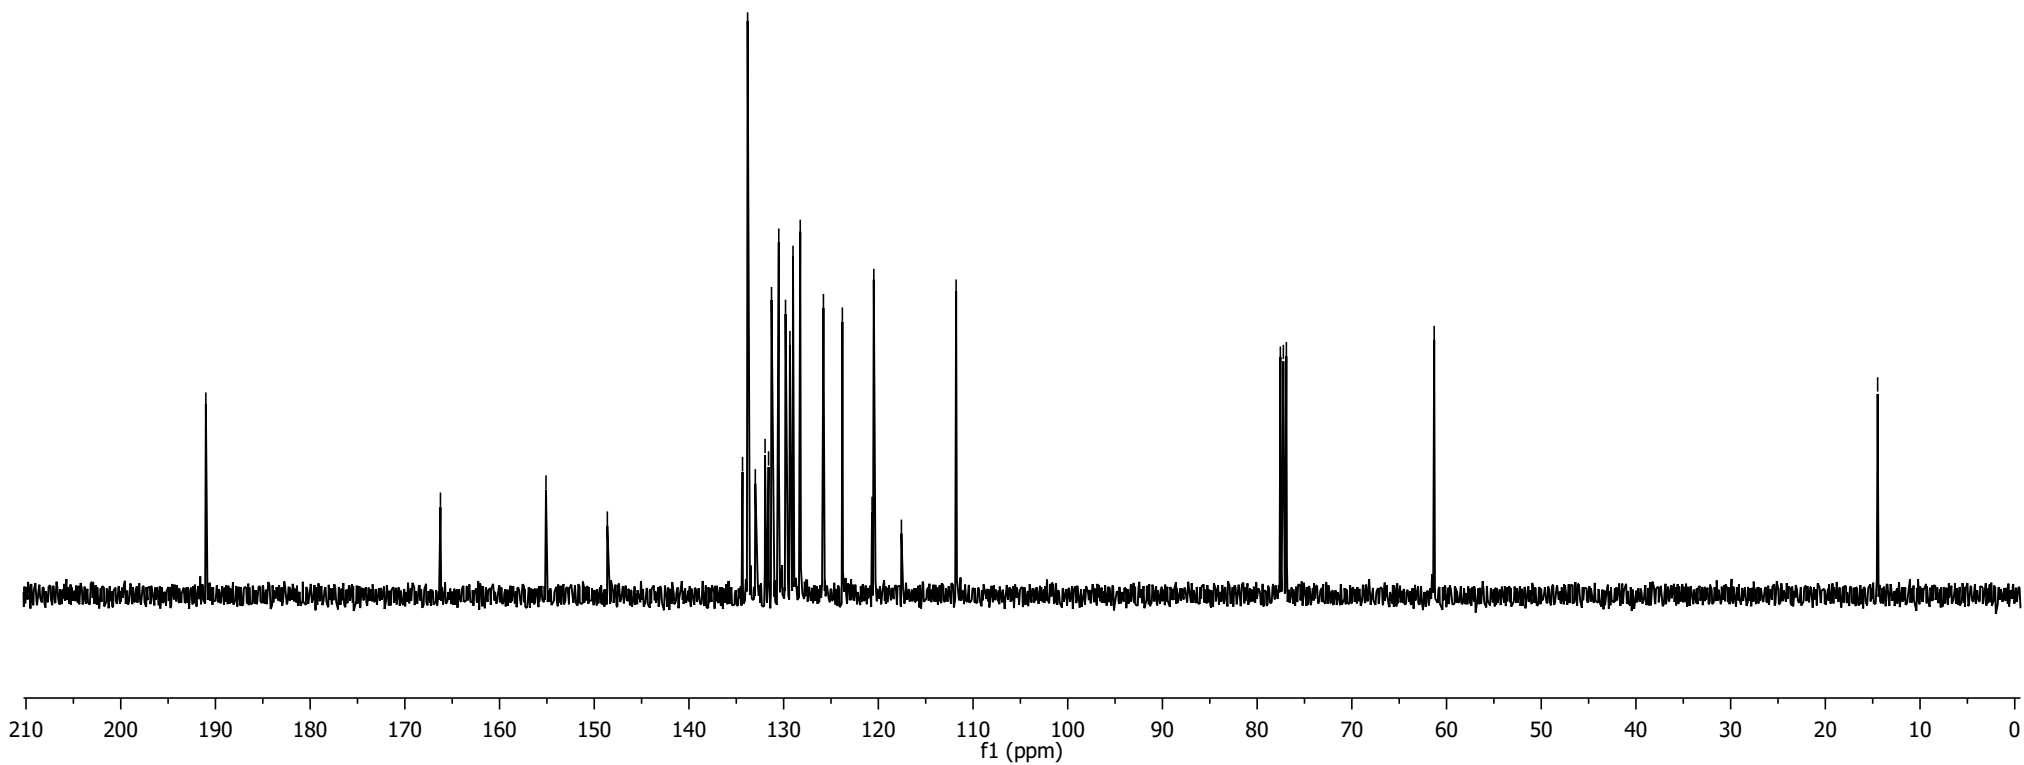

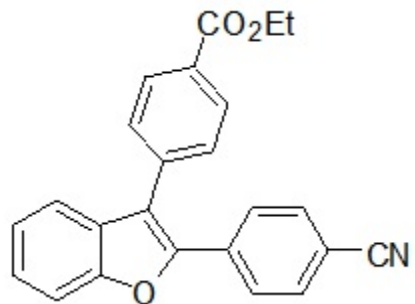

27

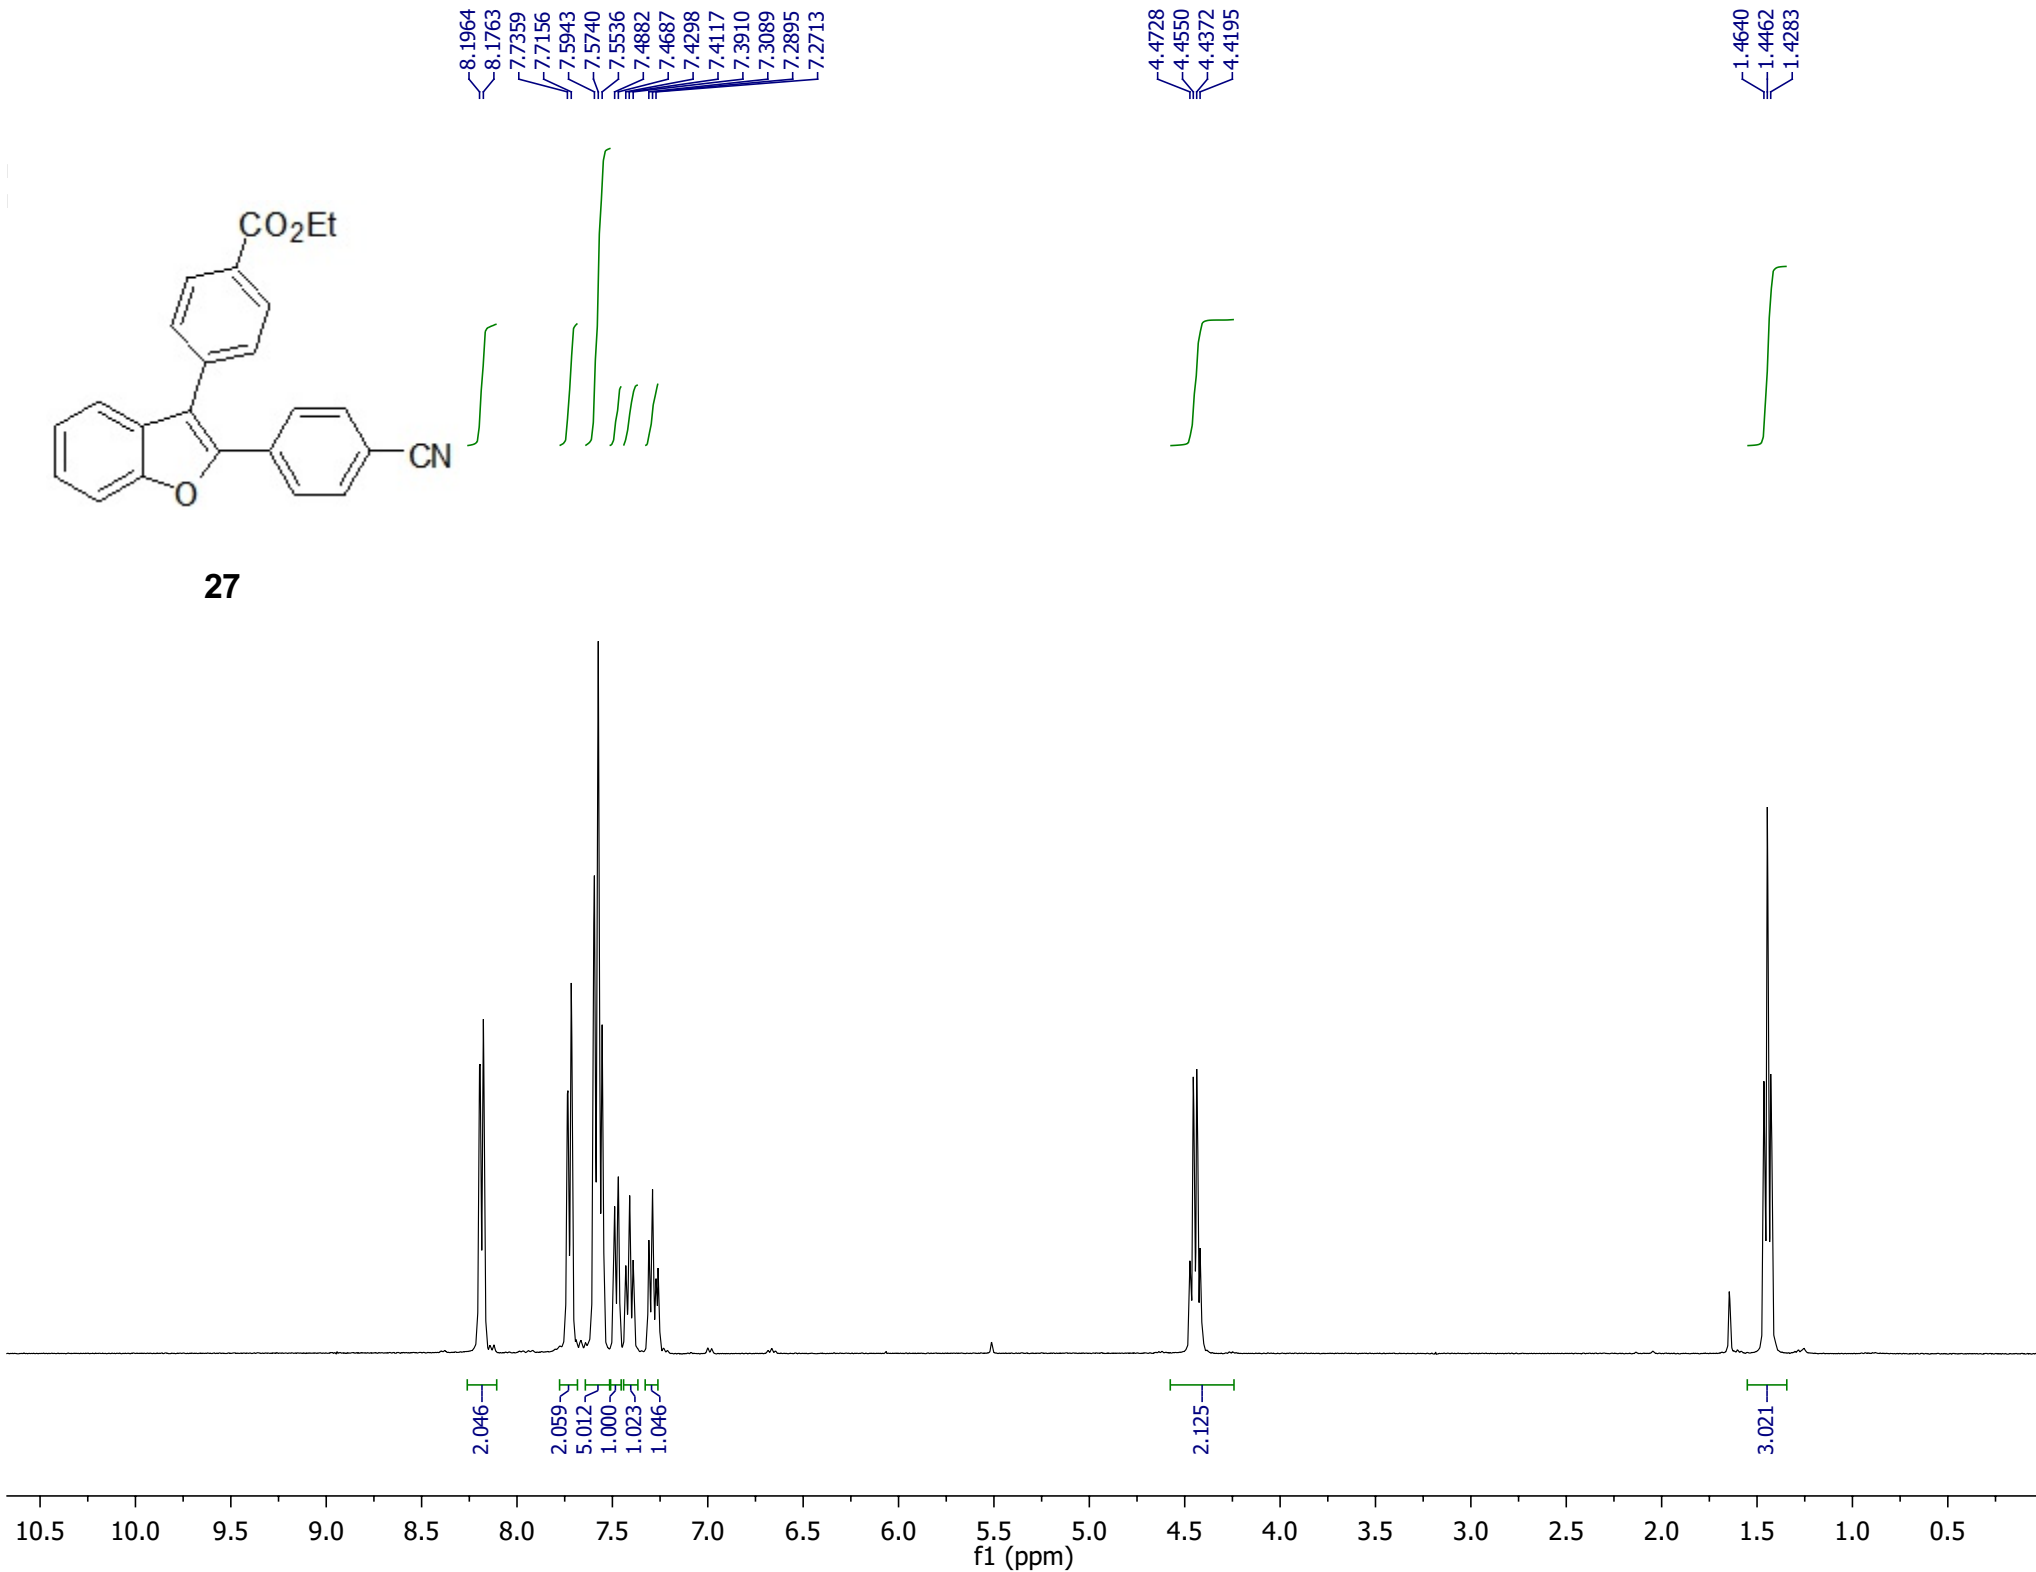

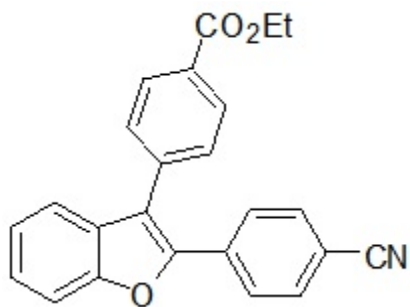

27

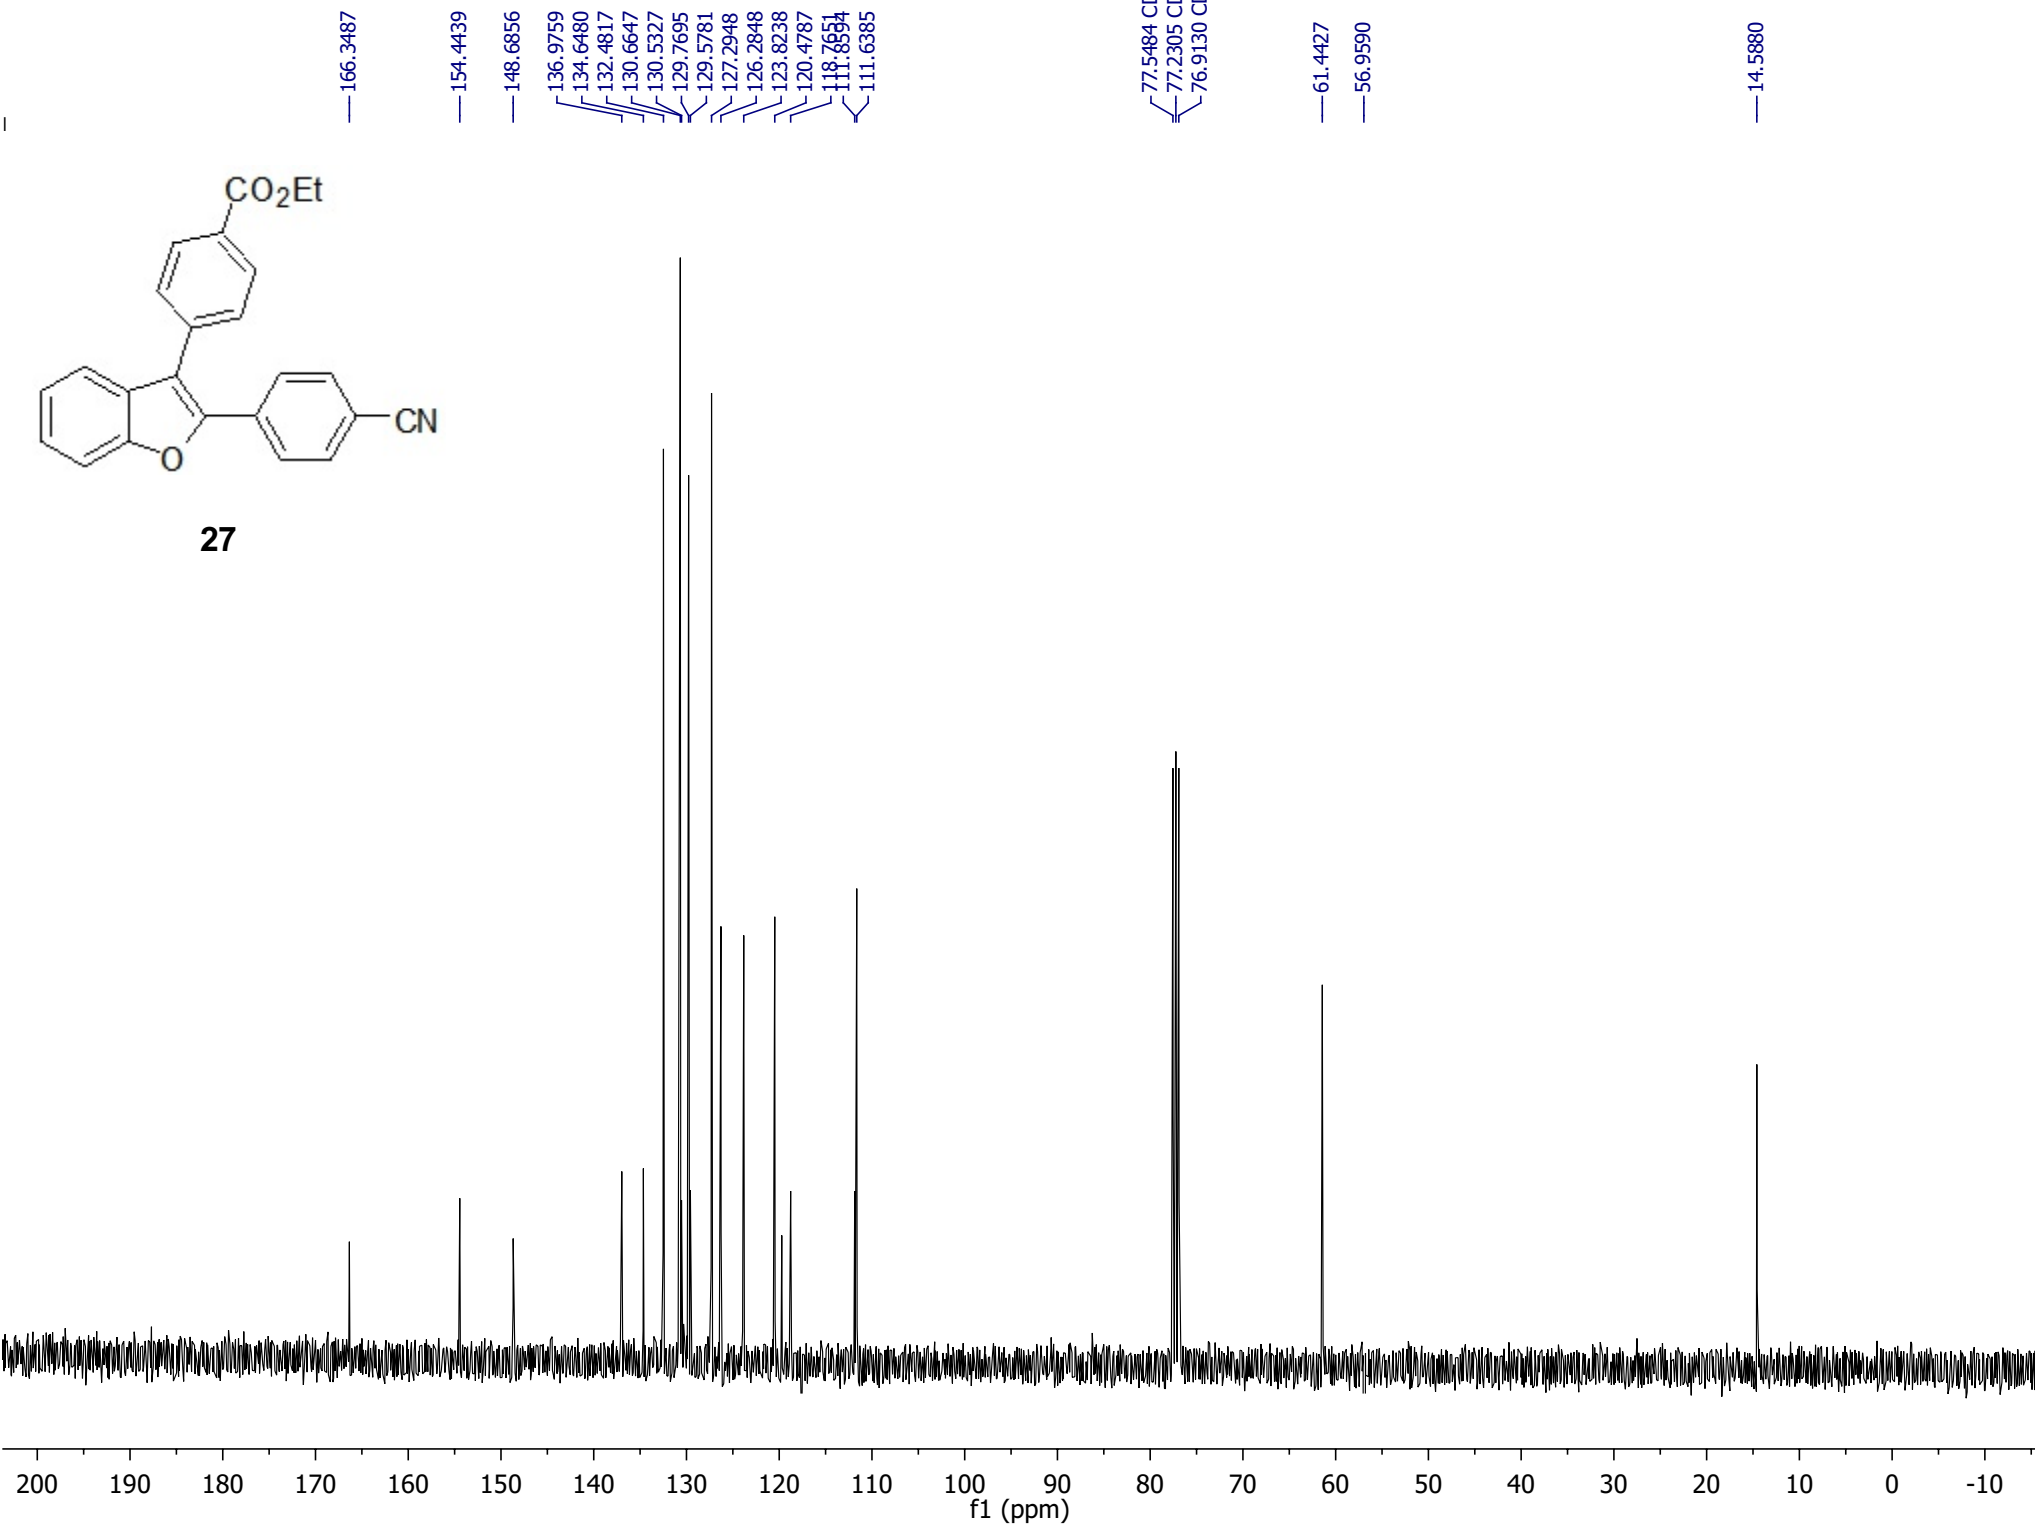

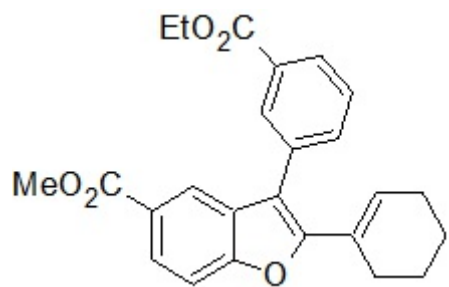

29

8.13, 8.13, 8.12, 8.10, 8.08, 8.02, 8.01, 7.99, 7.99, 7.63, 7.63, 7.56, 7.54, 7.52, 7.48, 7.46, 7.46, 6.45, 6.44

4.43, 4.41, 4.40, 4.38

3.88

2.18, 2.12

1.63, 1.62, 1.61

1.42, 1.40, 1.39

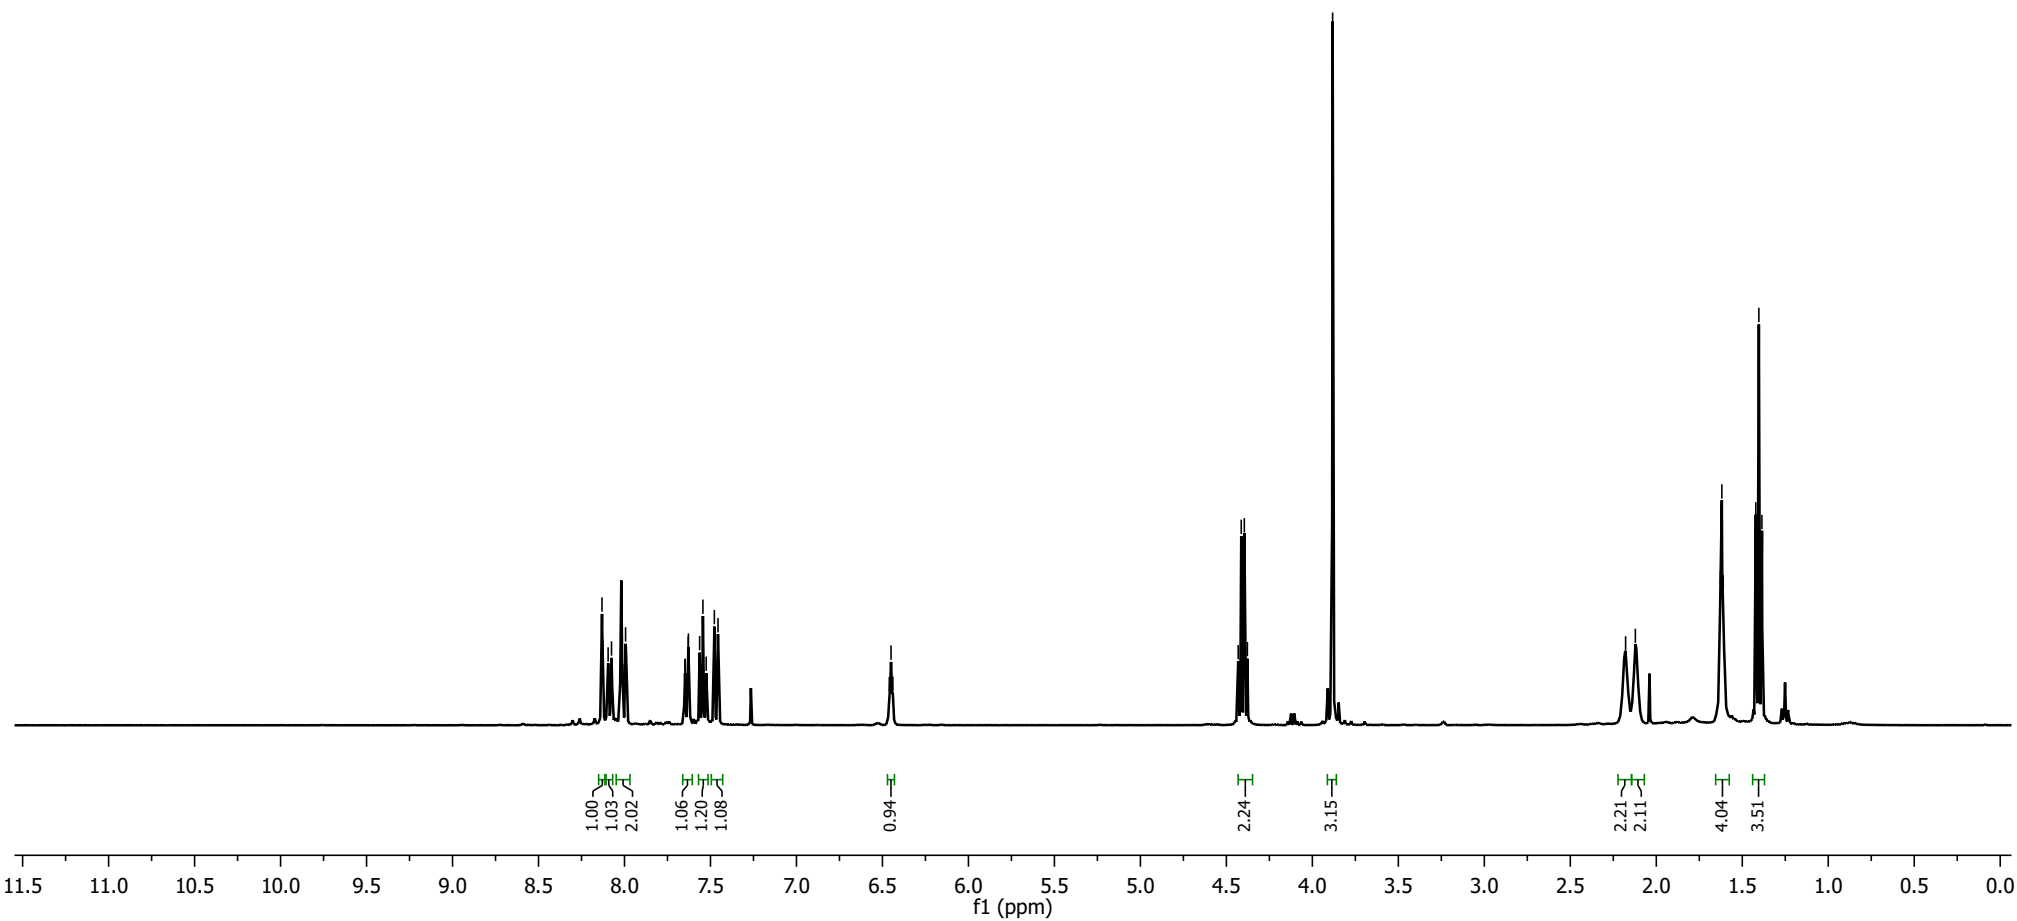



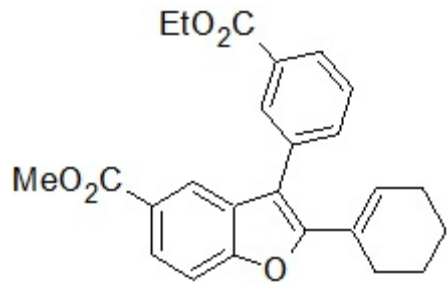

29

167.42  
166.56  
156.02  
154.49  
134.45  
133.20  
131.20  
131.10  
131.04  
130.58  
128.90  
128.85  
127.95  
126.35  
125.24  
124.96  
115.49  
110.78

77.55 cdcl3  
77.23 cdcl3  
76.91 cdcl3

61.30

52.21

26.59

25.88

22.58

21.91

14.51

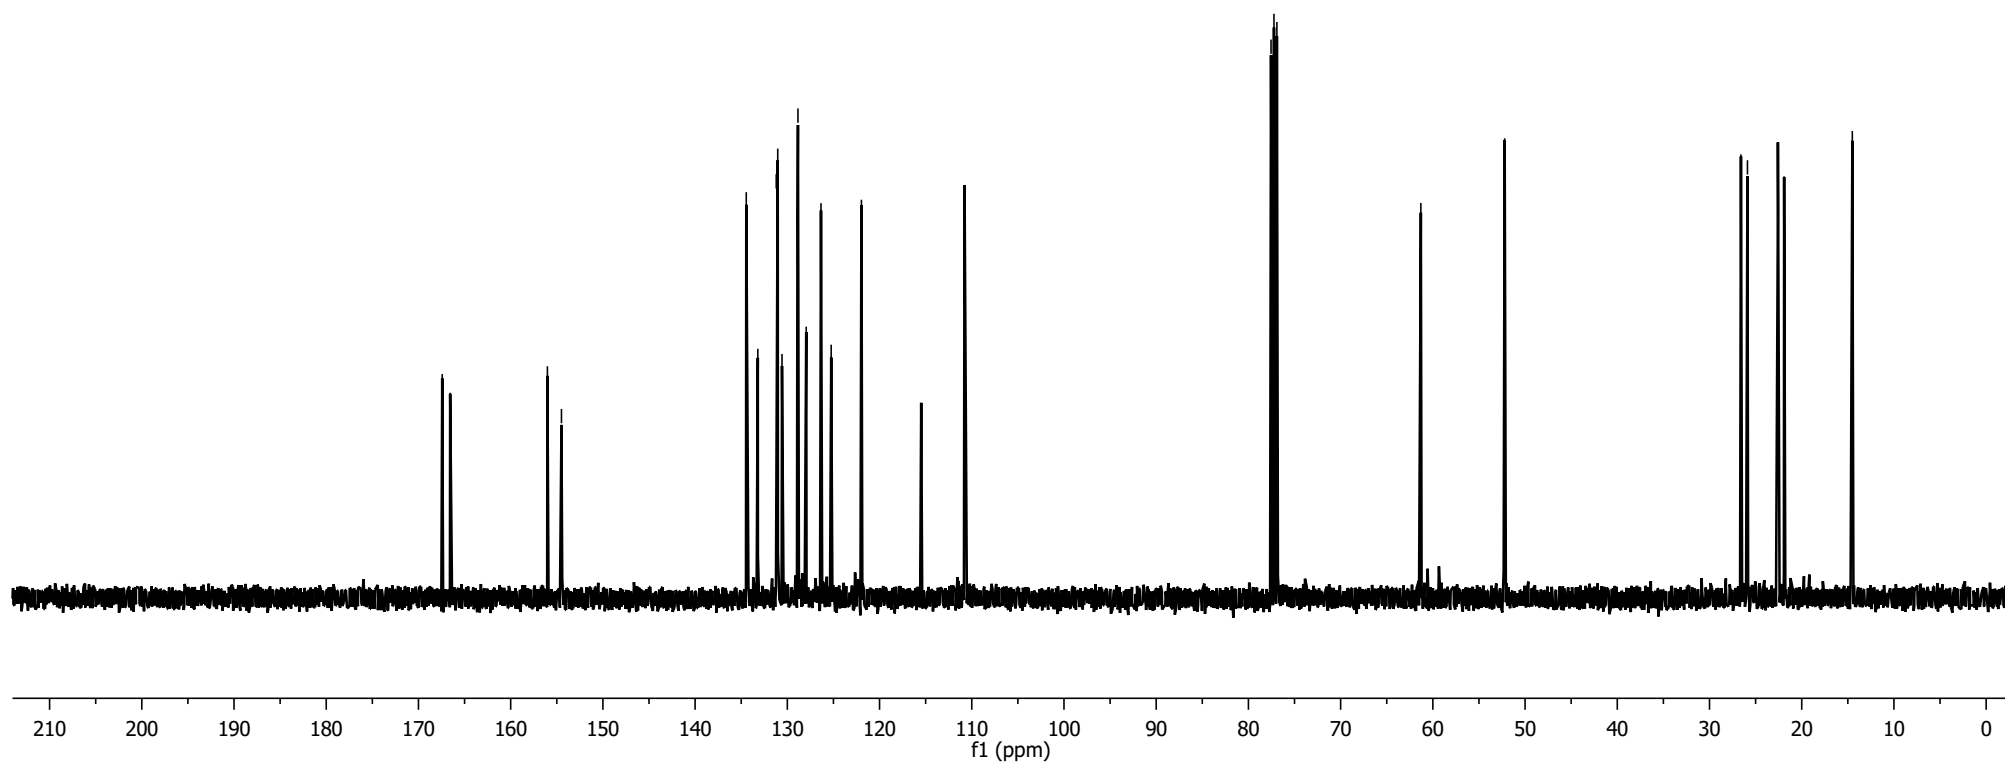

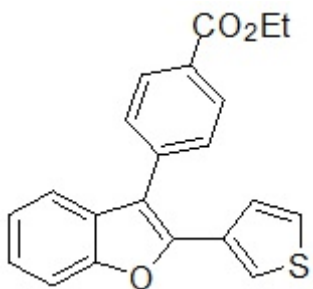

31

8.19  
8.17  
7.64  
7.63  
7.62  
7.62  
7.56  
7.54  
7.48  
7.46  
7.37  
7.35  
7.32  
7.29  
7.28  
7.27  
7.26  
7.25  
7.23  
7.21  
7.19

4.48  
4.46  
4.43  
4.41

1.47  
1.45  
1.42

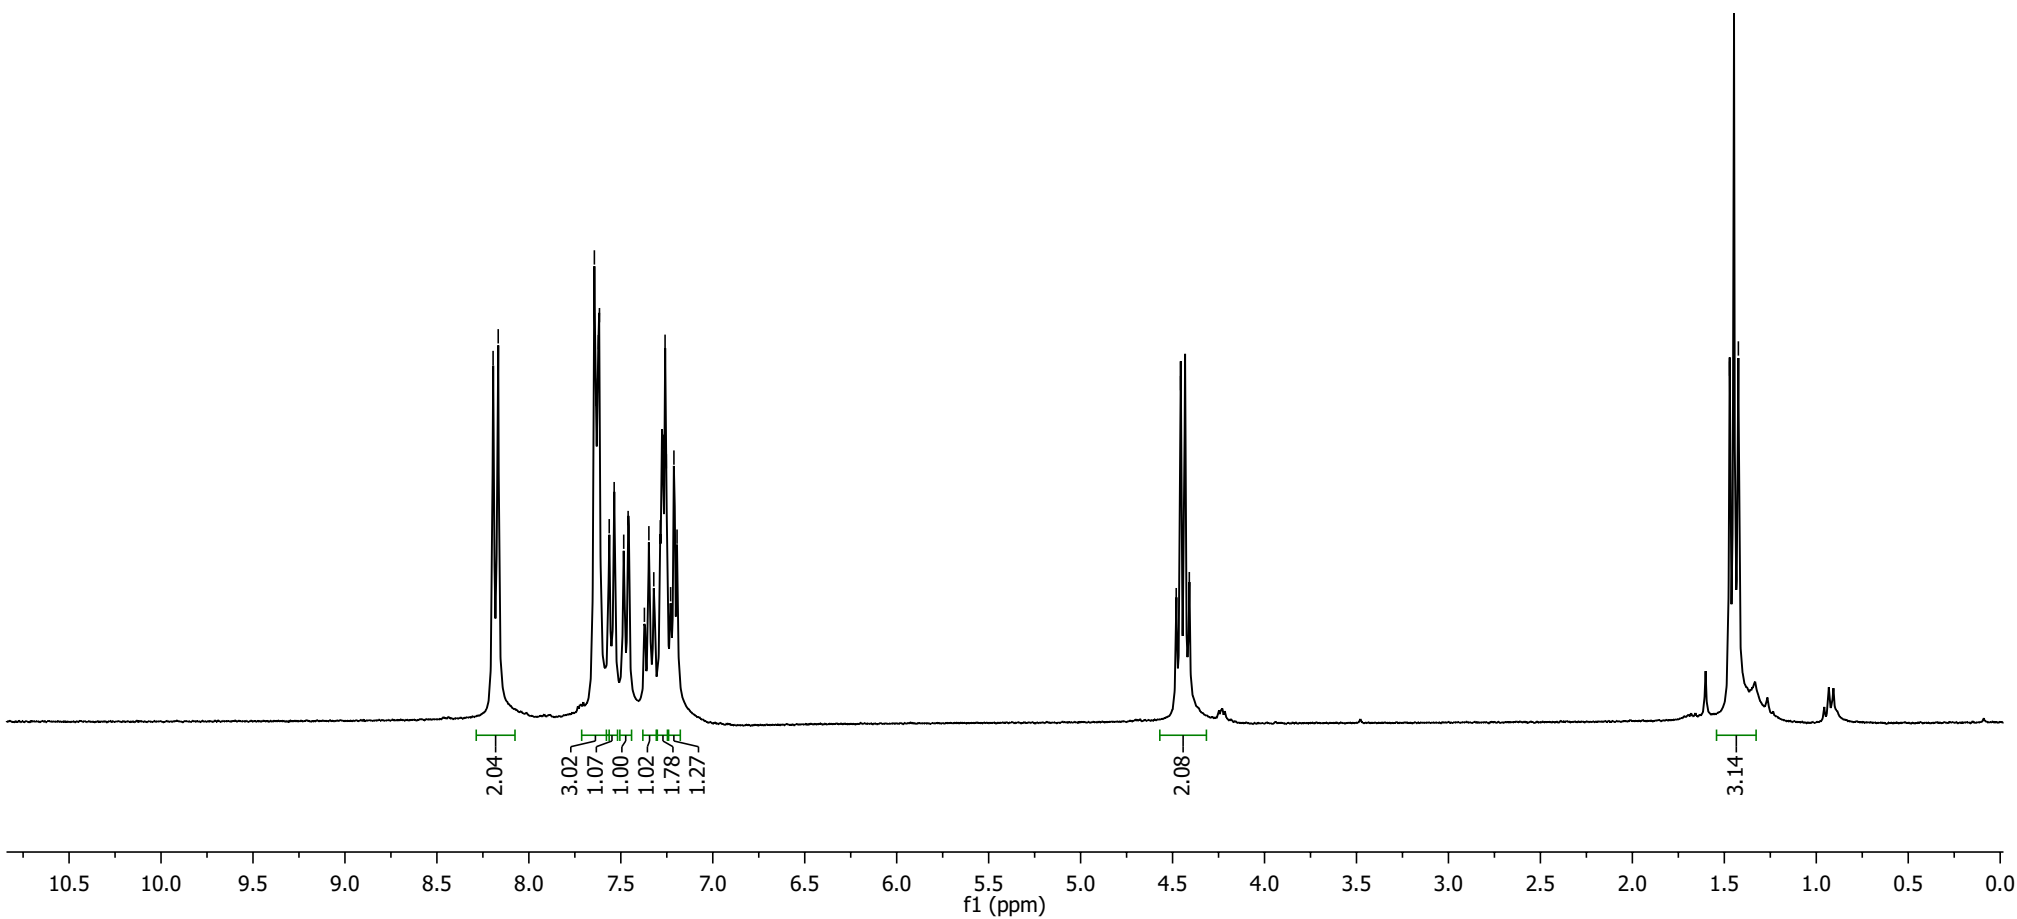

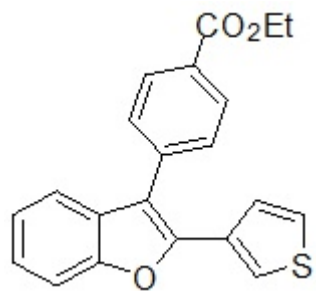

31

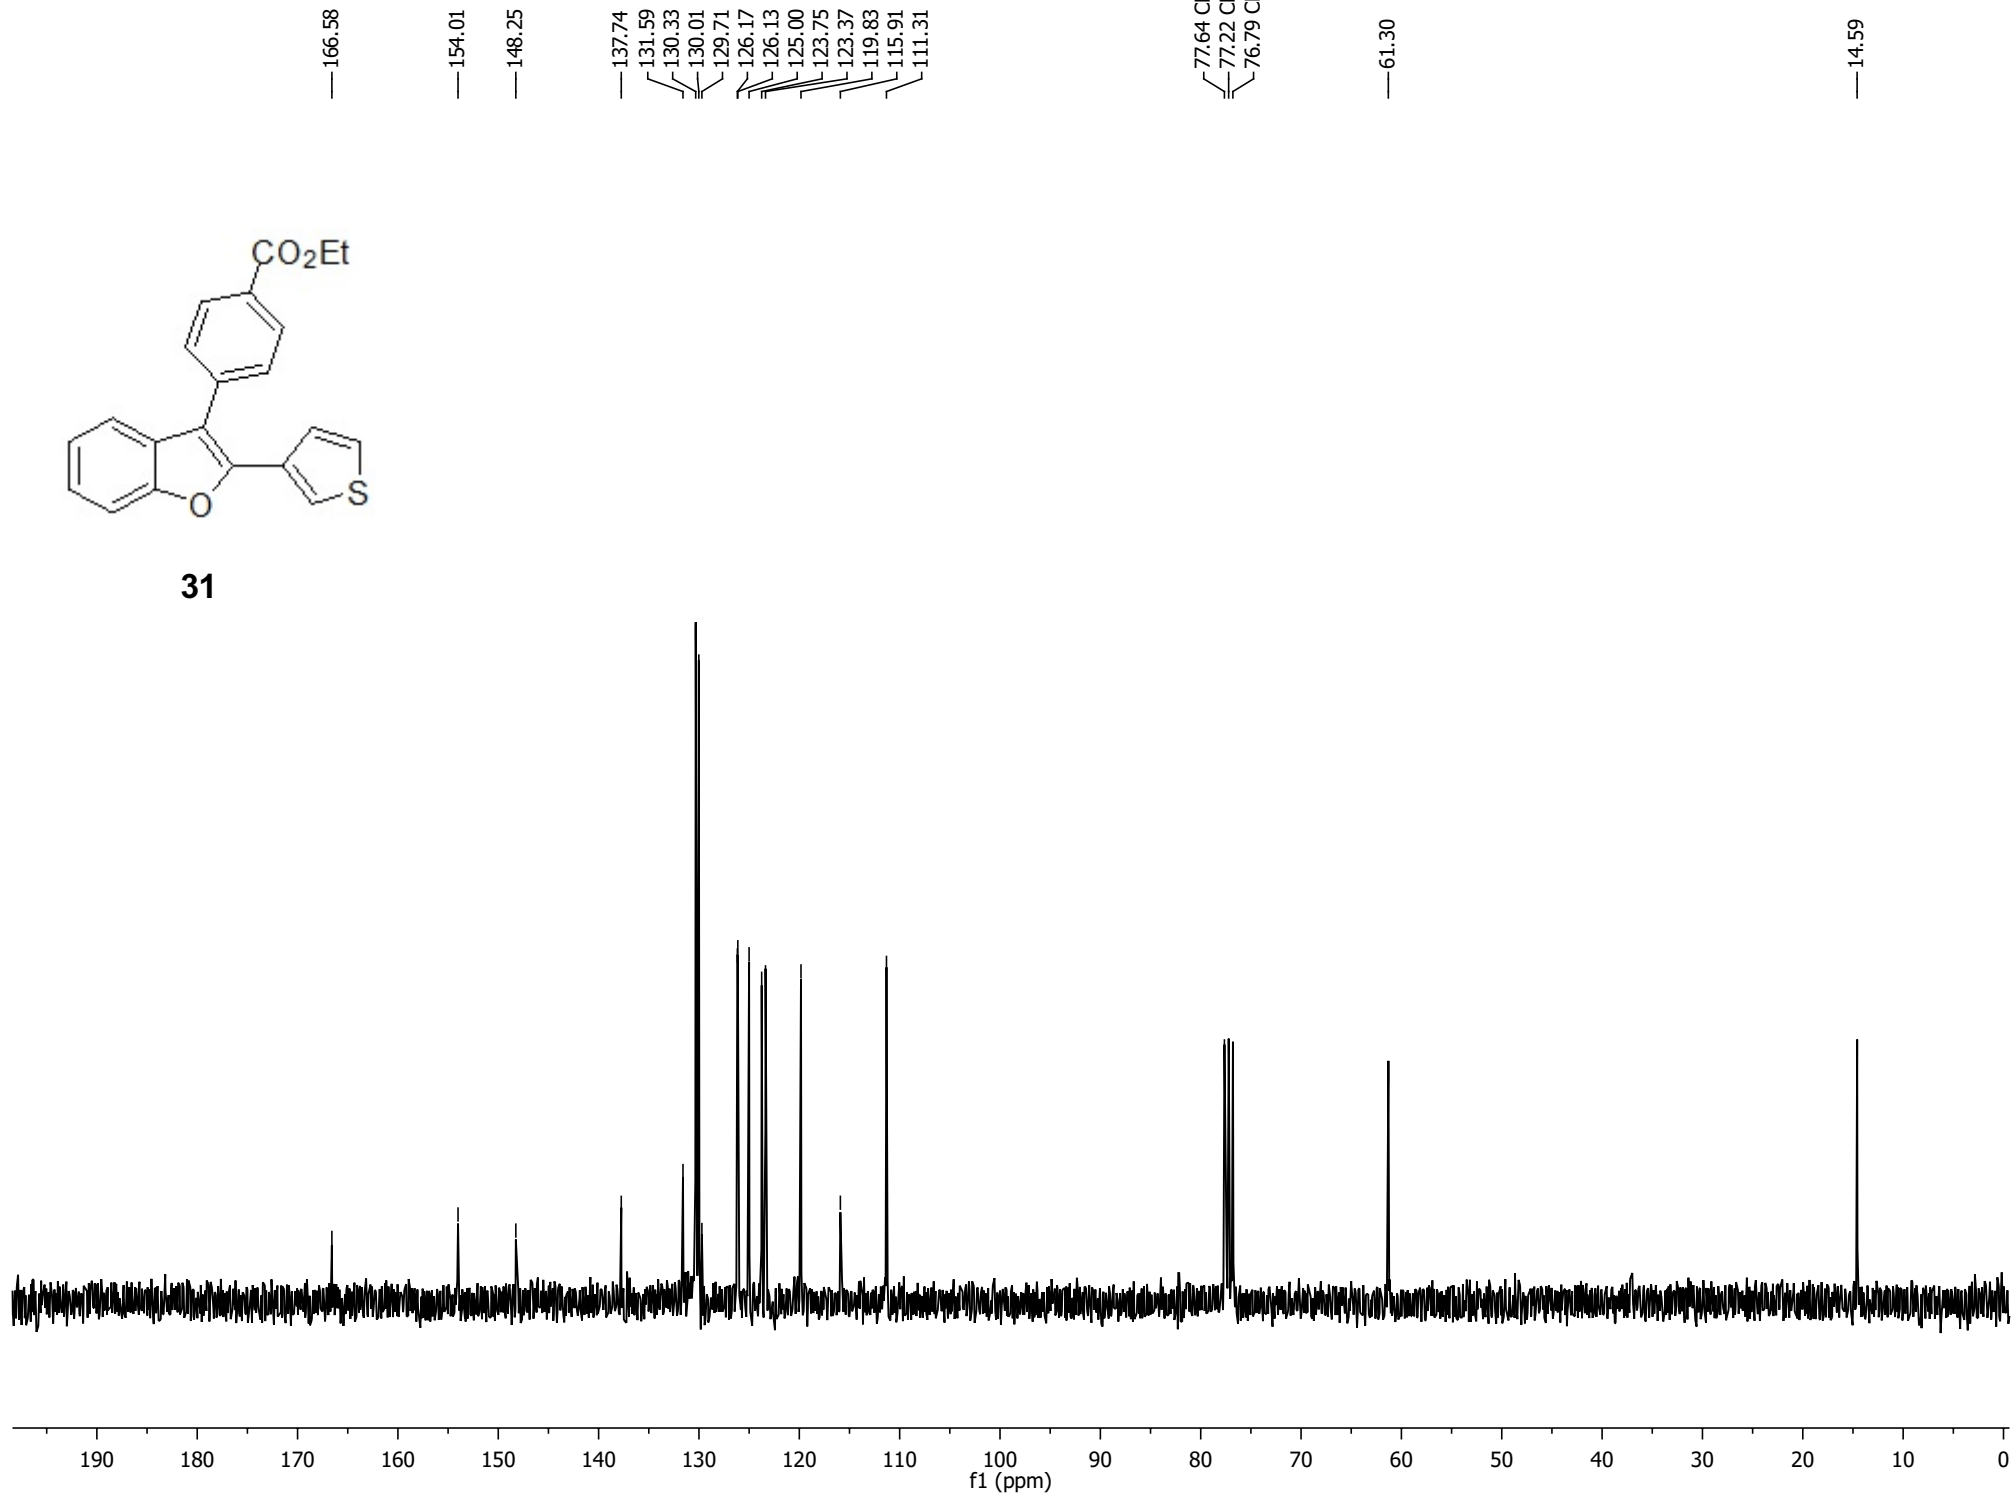

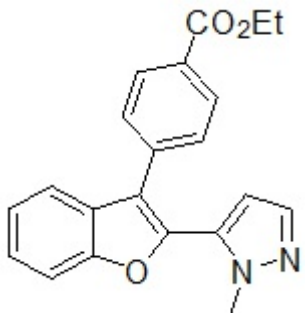

33

8.1165  
8.0972  
7.6736  
7.6616  
7.6392  
7.6186  
7.5658  
7.5465  
7.5318  
7.4784  
7.4718  
7.4593  
7.4527  
7.4413  
7.4008  
7.3828  
7.3642  
7.3311  
7.3126  
7.2944  
7.2599

4.4275  
4.4098  
4.3920  
4.3743

3.6268

1.4274  
1.4096  
1.3918

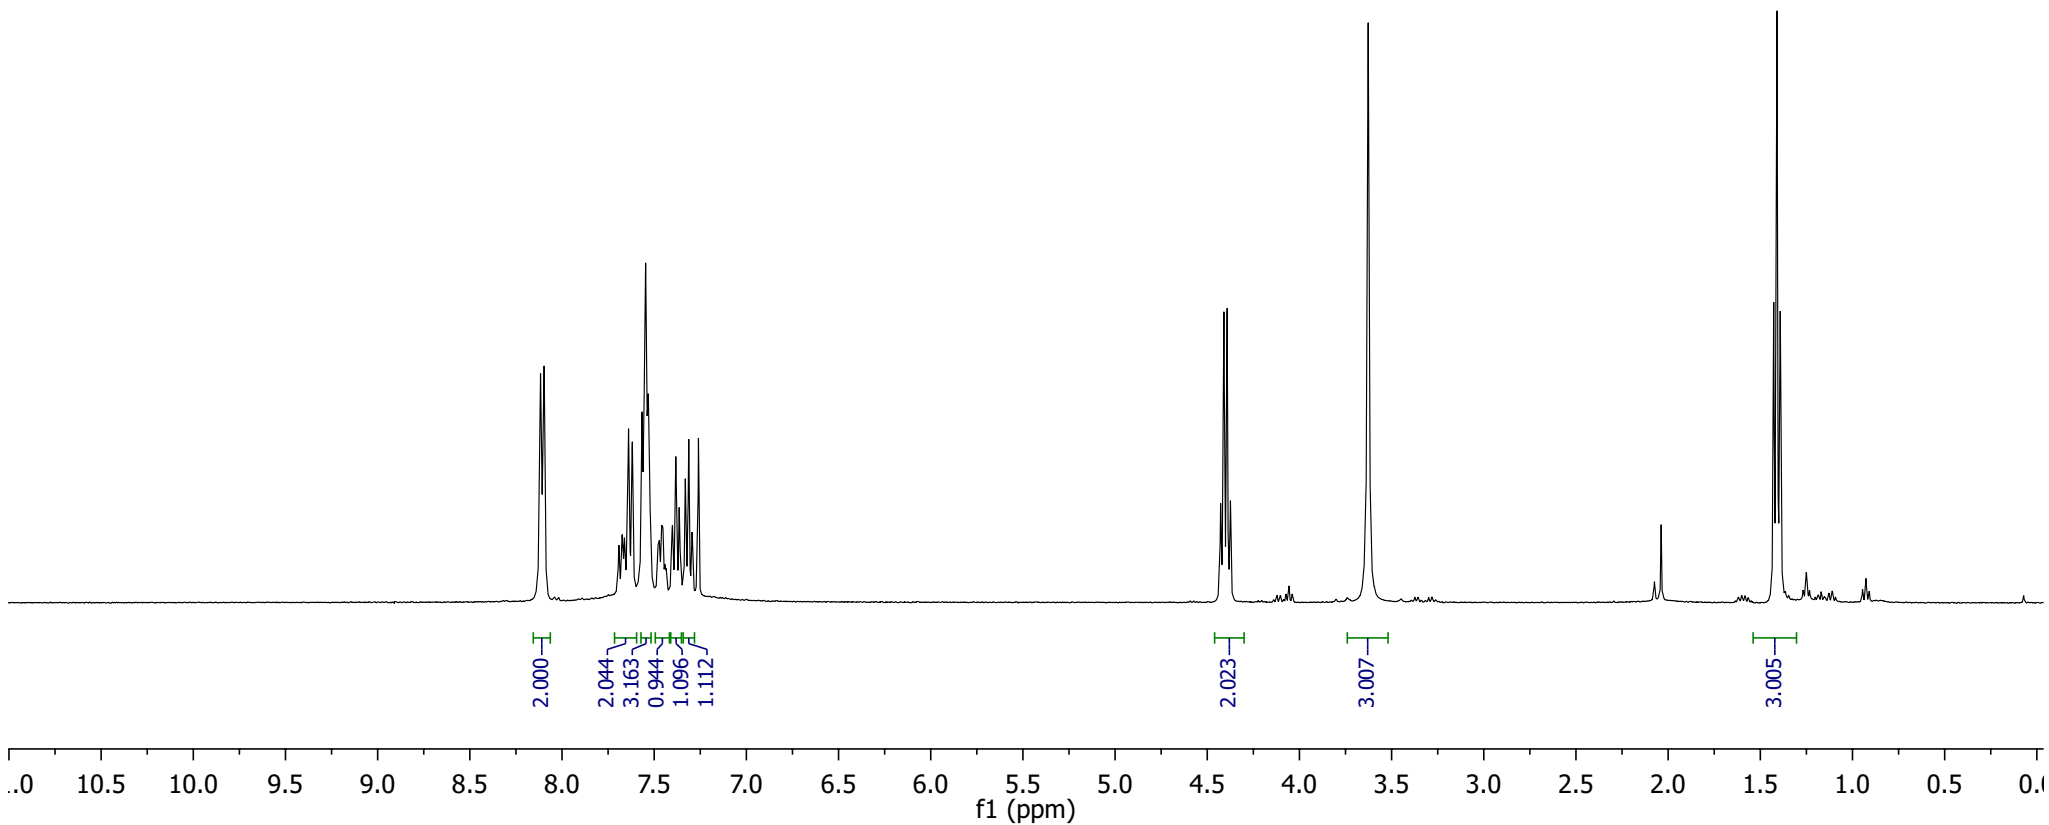

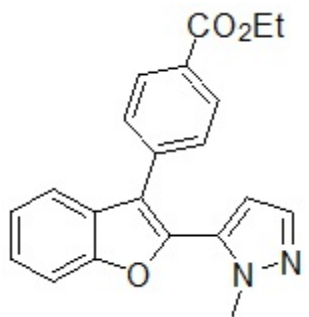

33

— 166.3695

— 154.7513

136.7917  
132.2921  
132.1940  
132.0953  
130.3738  
129.8966  
129.1242  
128.7098  
128.5889  
128.1368  
125.4898  
123.6995  
120.2040  
111.6084

77.5459 CDCl3  
77.2284 CDCl3  
76.9107 CDCl3

— 61.2870

— 14.5593

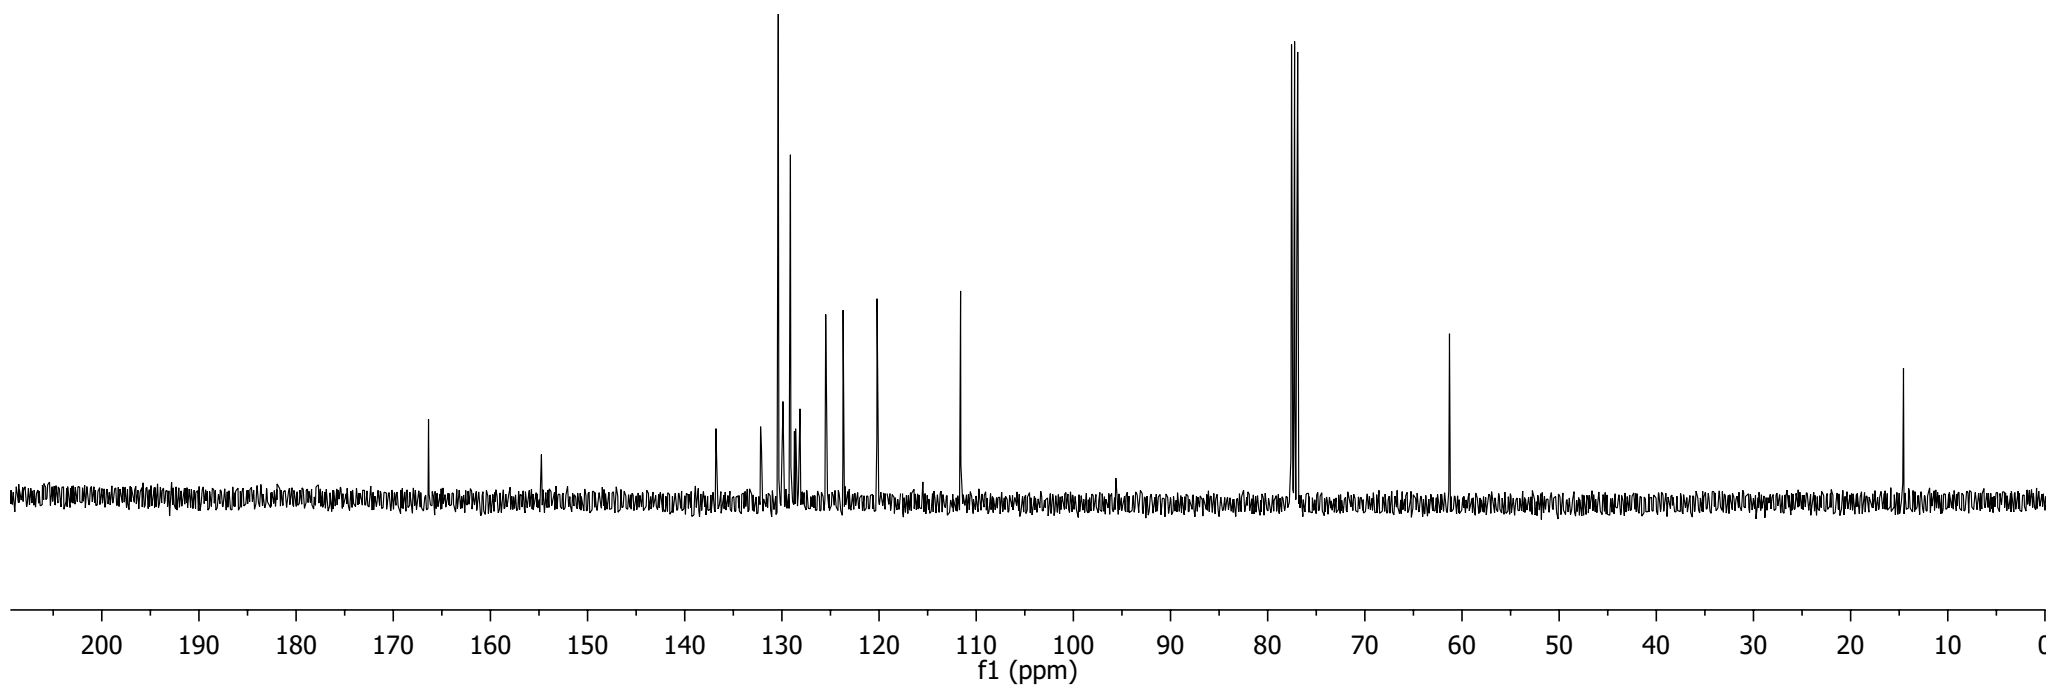

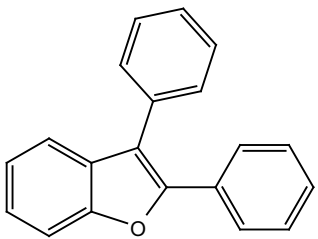

34

7.6706  
7.6464  
7.5698  
7.5423  
7.5138  
7.4905  
7.4659  
7.4408  
7.4243  
7.3999  
7.3548  
7.3299  
7.2949  
7.2605  
7.2371  
7.2118

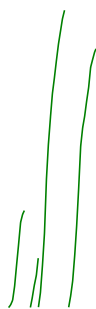

2.000  
1.019  
6.128  
5.334

0.0001

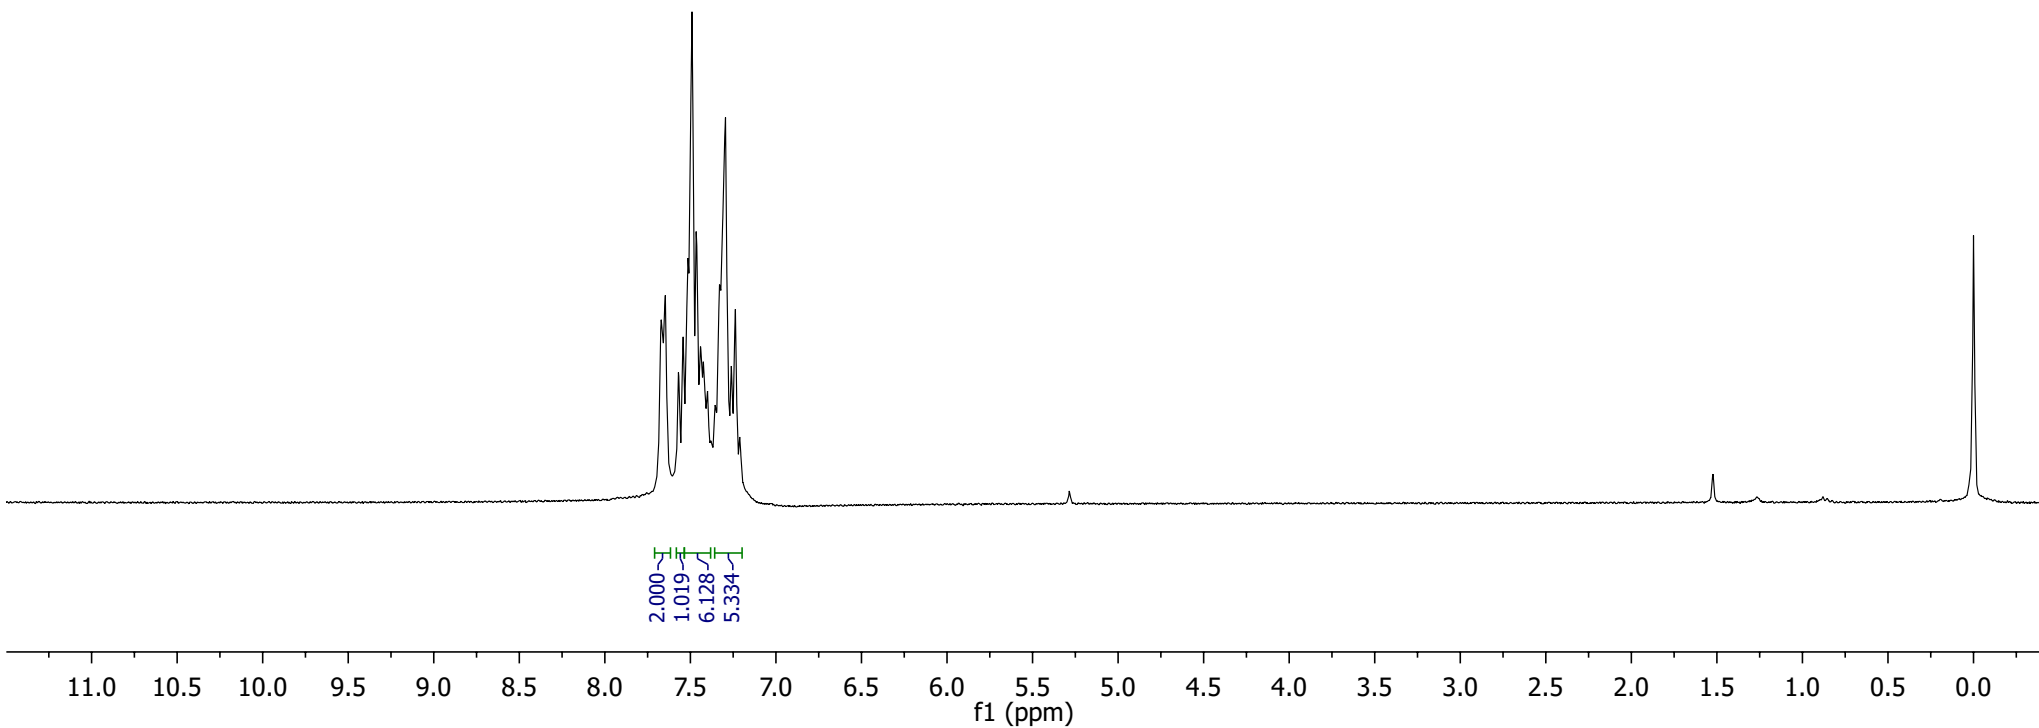

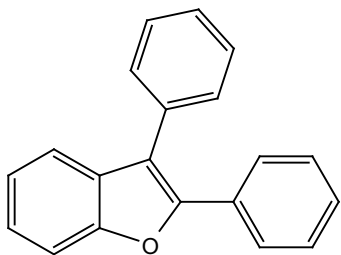

34

154.1920  
150.7224  
133.0513  
130.8653  
130.4472  
129.9754  
129.1815  
128.6365  
128.5612  
127.8368  
127.2330  
124.8913  
123.1218  
120.2454  
117.7034  
111.3215

77.6544 CDC13  
77.2297 CDC13  
76.8064 CDC13

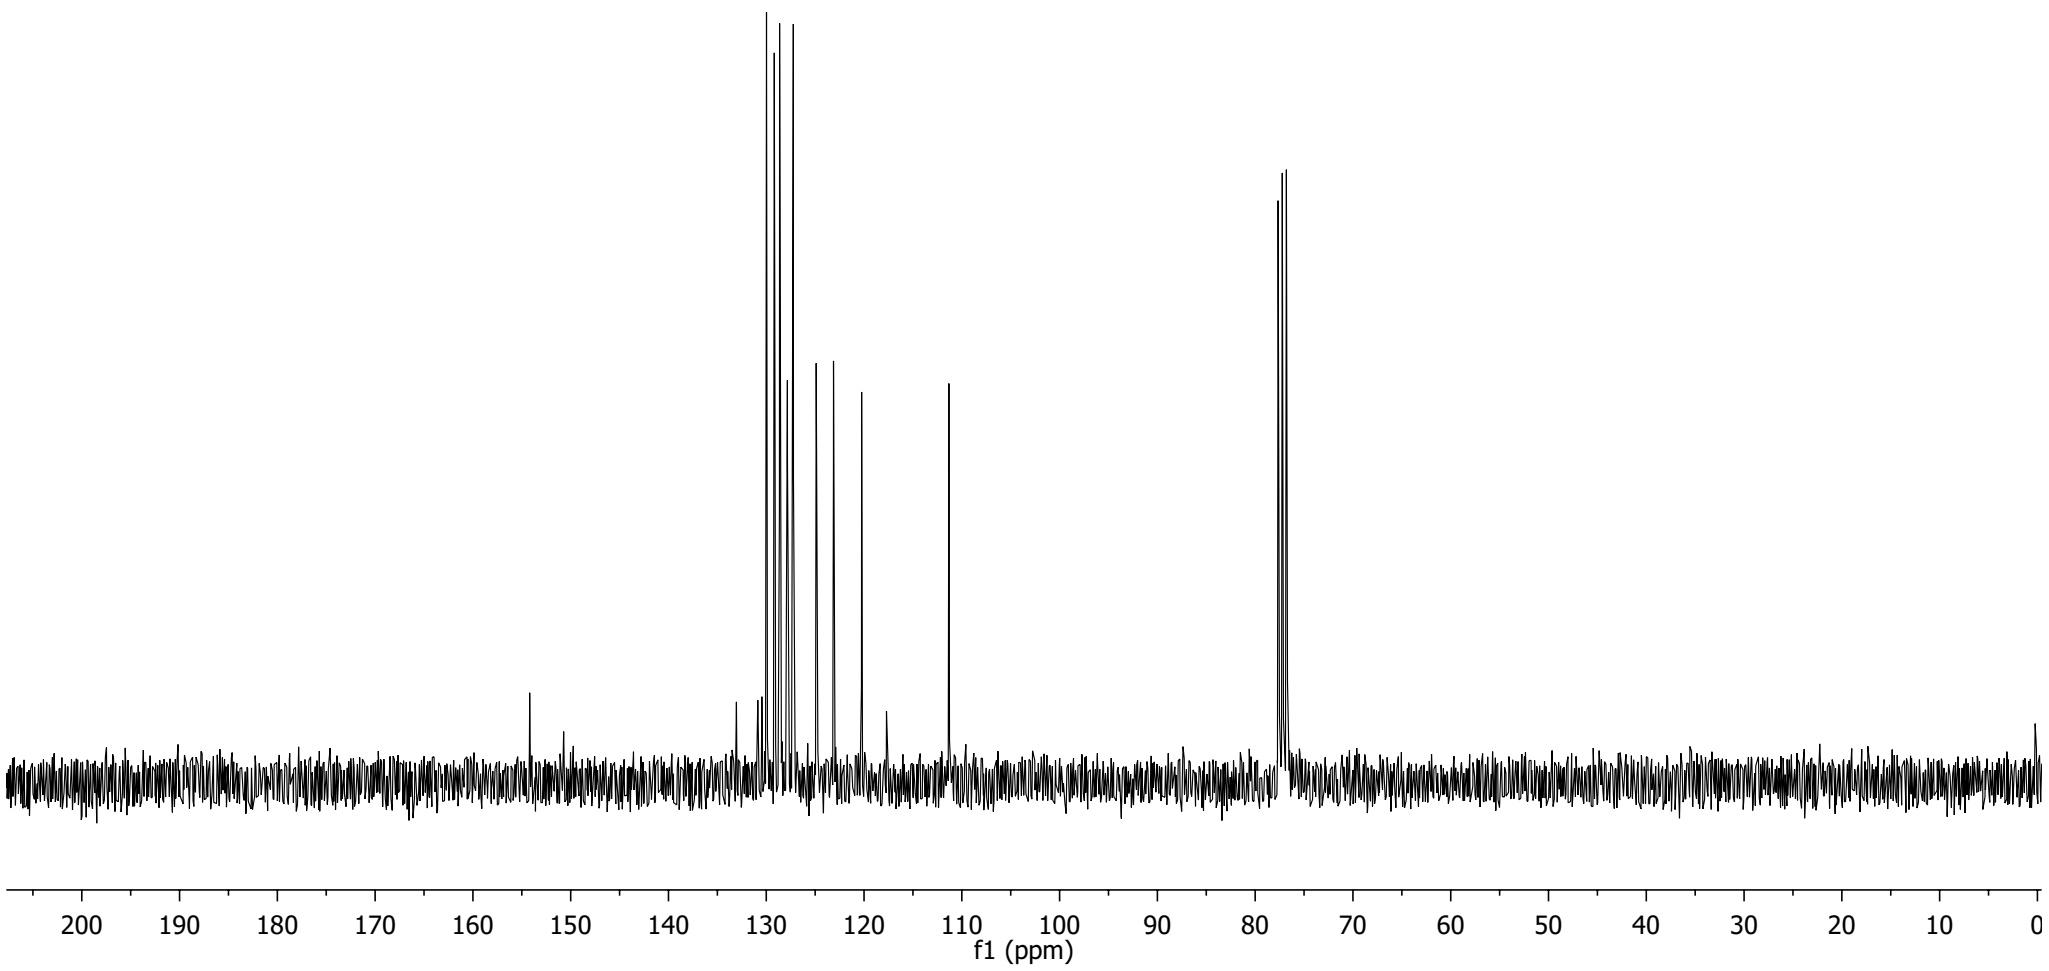

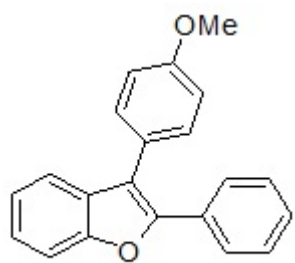

36

7.699  
7.694  
7.678  
7.674  
7.566  
7.546  
7.510  
7.488  
7.452  
7.445  
7.439  
7.428  
7.423  
7.416  
7.355  
7.353  
7.351  
7.347  
7.337  
7.333  
7.331  
7.327  
7.324  
7.316  
7.312  
7.307  
7.303  
7.291  
7.289  
7.260  
7.245  
7.244  
7.242  
7.038  
7.031  
7.026  
7.014  
7.009  
7.002

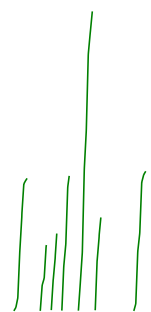

3.893

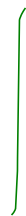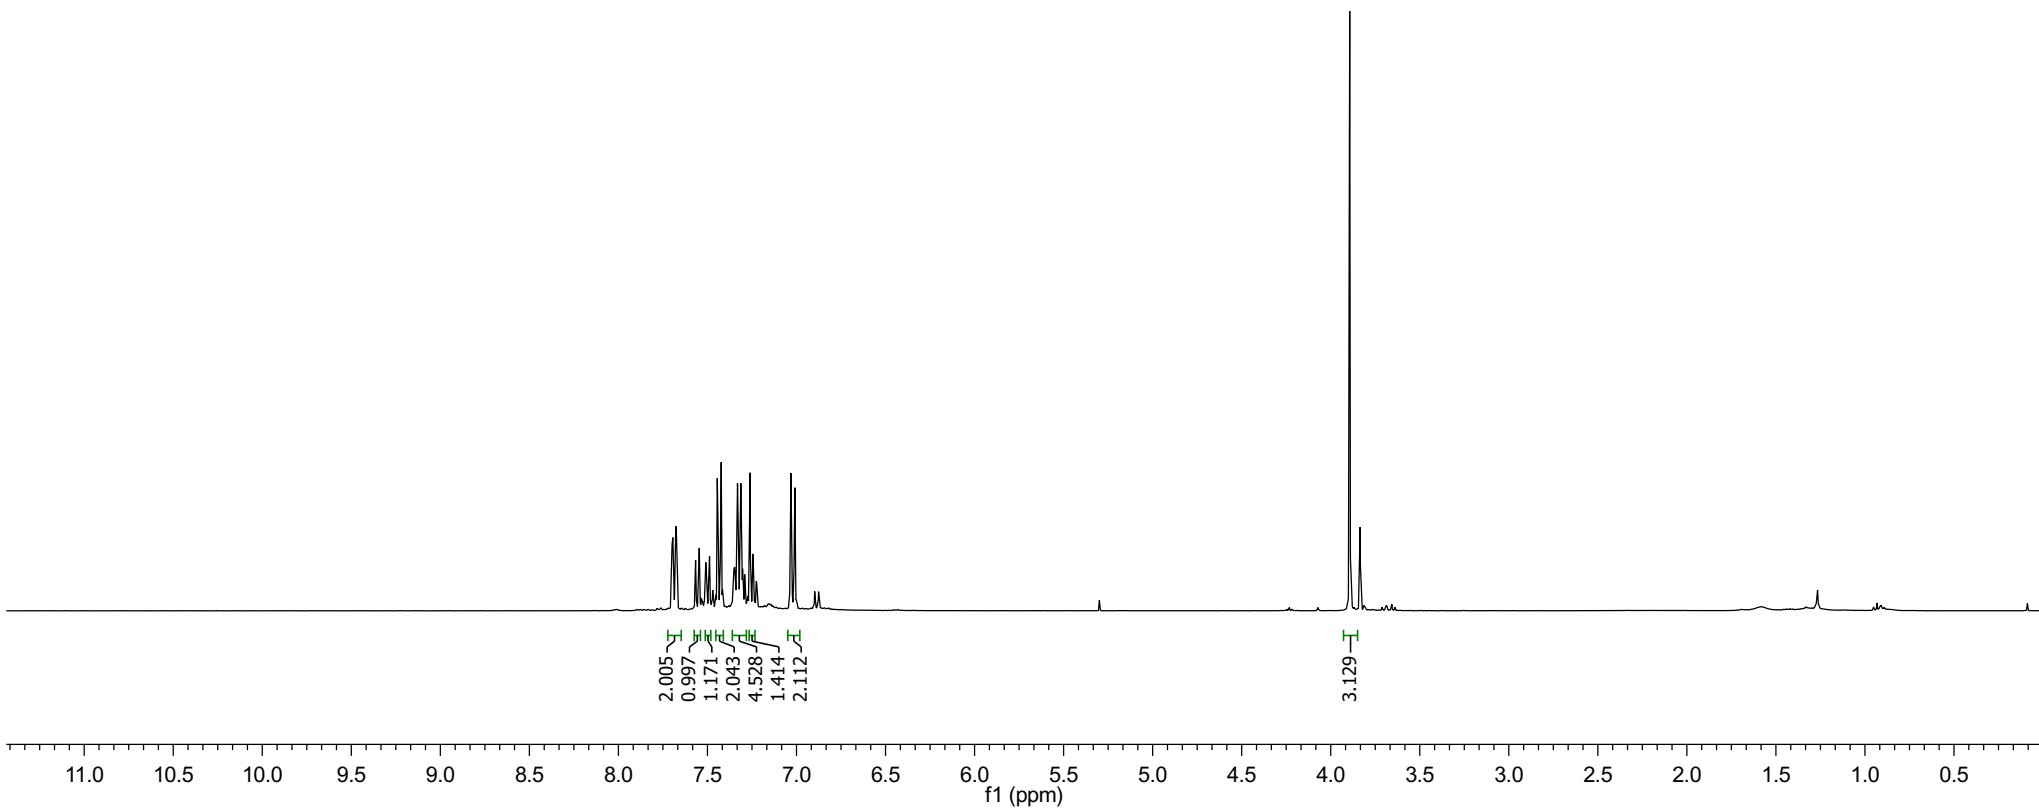



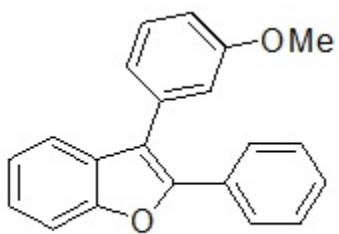

38

7.7599  
7.7557  
7.7393  
7.7360  
7.6161  
7.5958  
7.5678  
7.4459  
7.4261  
7.4063  
7.3948  
7.3920  
7.3853  
7.3770  
7.3745  
7.3700  
7.3598  
7.3557  
7.3514  
7.3297  
7.3077  
7.2894  
7.2725  
7.2703  
7.2543  
7.1541  
7.1352  
7.1187  
7.1129  
7.0182  
7.0140  
7.0117  
6.9974  
6.9933  
6.9910

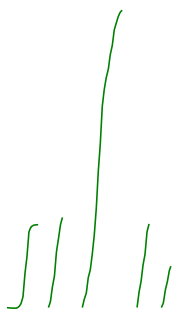

3.8323

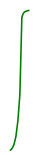

2.000  
2.174  
7.166  
2.017  
1.000

3.382

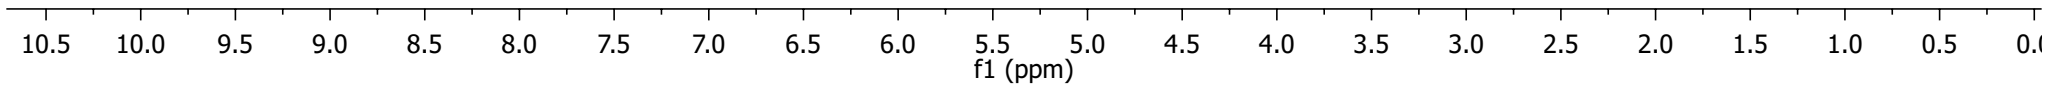

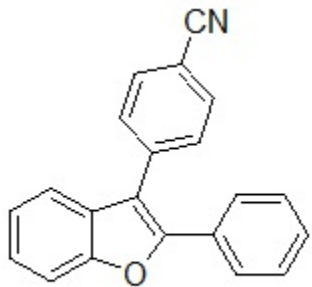

40

7.74  
7.72  
7.72  
7.62  
7.62  
7.60  
7.59  
7.58  
7.56  
7.49  
7.47  
7.38  
7.35  
7.34  
7.34  
7.33  
7.29  
7.27  
7.25  
7.24

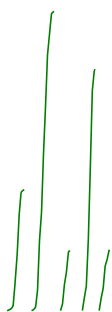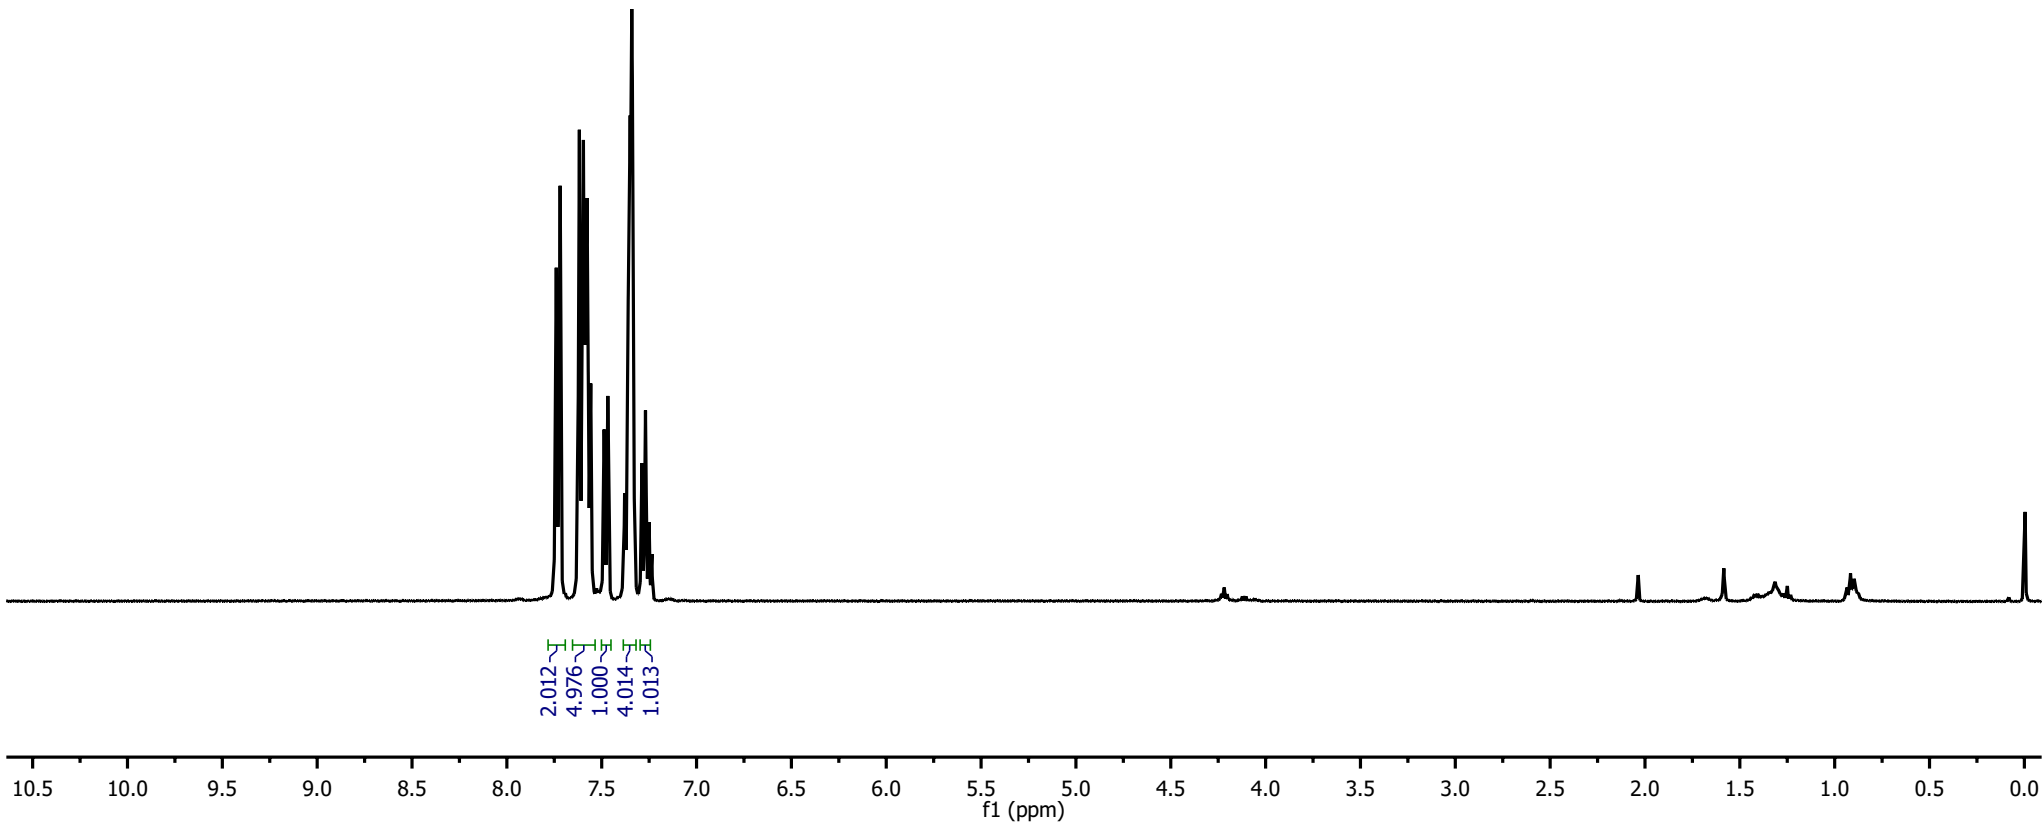

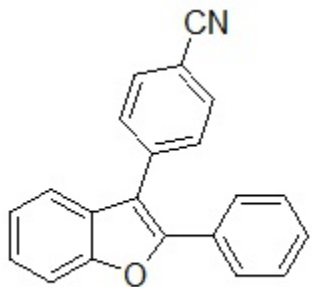

40

154.28  
151.80

138.29  
132.93  
130.54  
130.03  
129.25  
129.21  
128.86  
127.53  
125.35  
123.56  
119.64  
118.98  
115.90  
111.61  
111.41

77.55 CDCl3  
77.23 CDCl3  
76.91 CDCl3

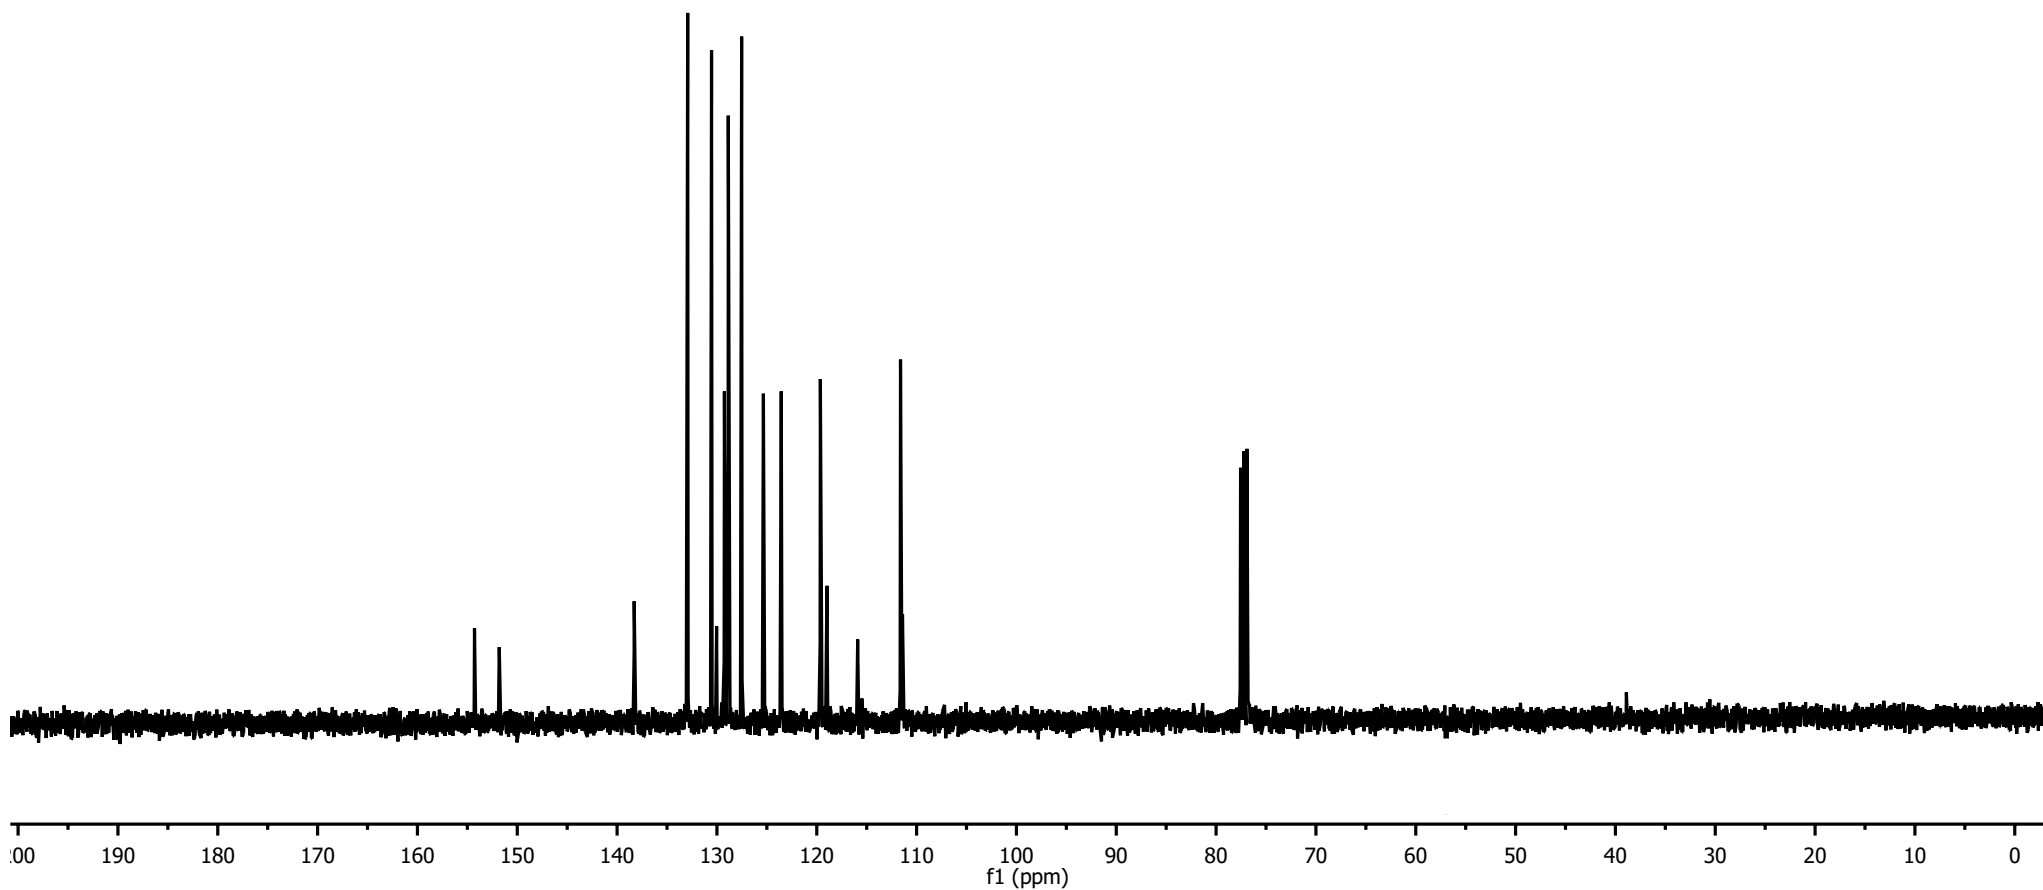

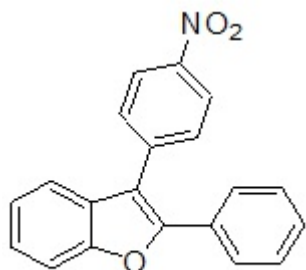

42

8.35  
8.34  
8.32  
8.31  
7.71  
7.68  
7.62  
7.59  
7.53  
7.51  
7.39  
7.38  
7.38  
7.37  
7.36  
7.36  
7.33  
7.30  
7.28  
7.27  
7.26

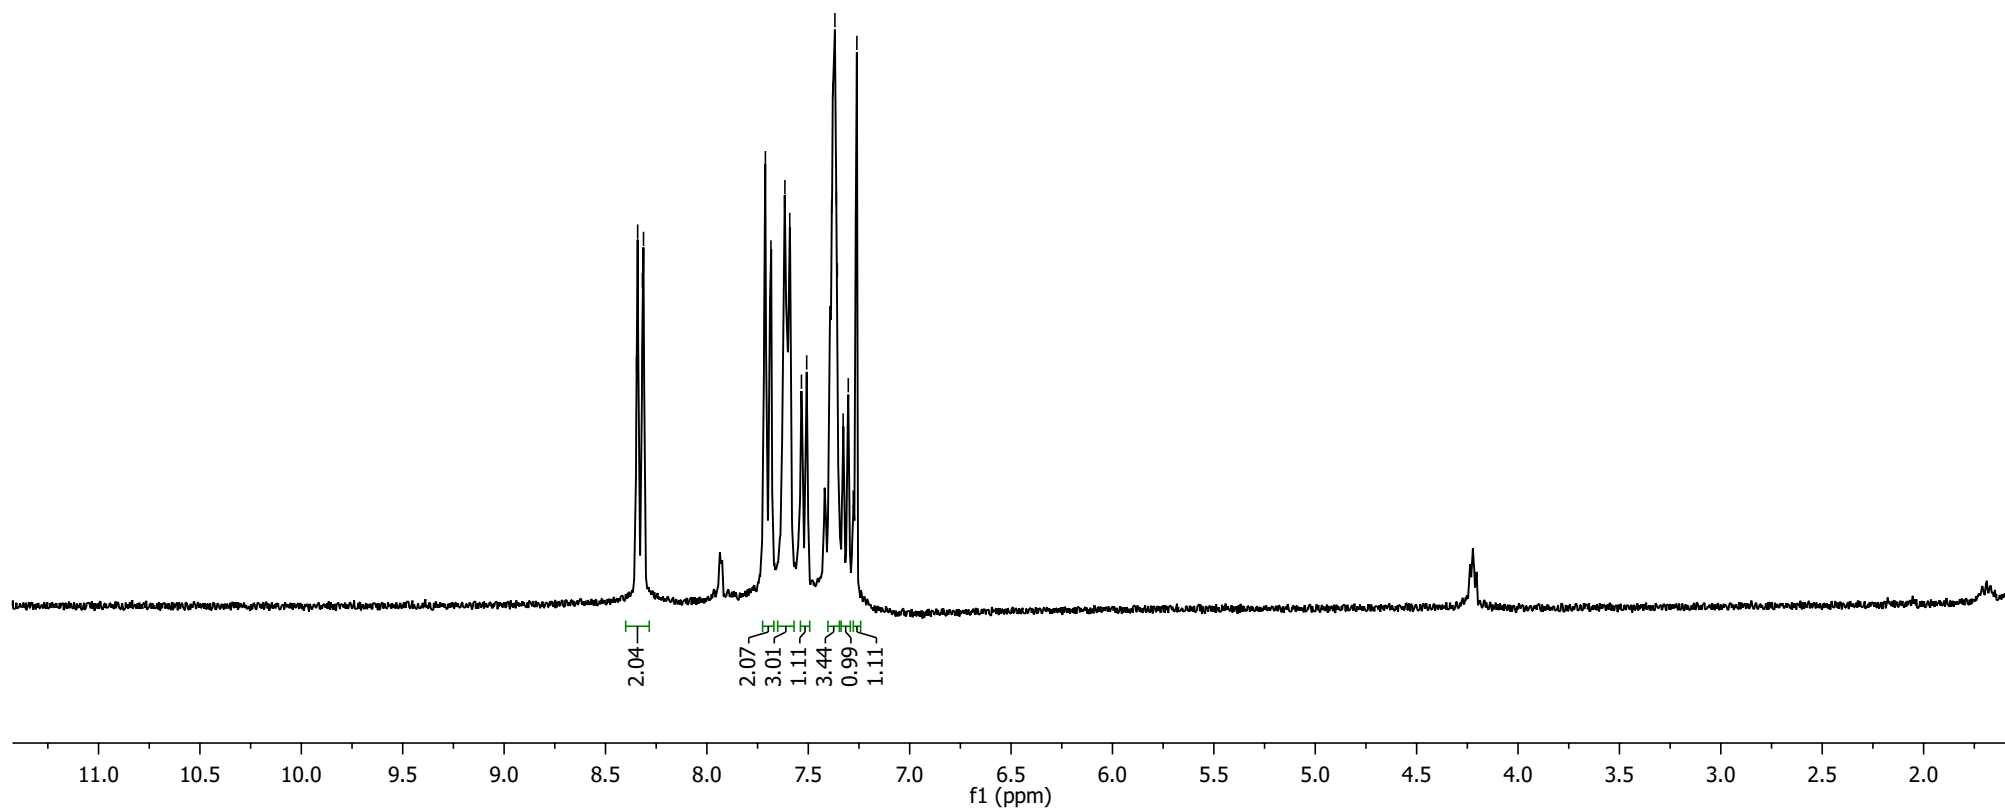

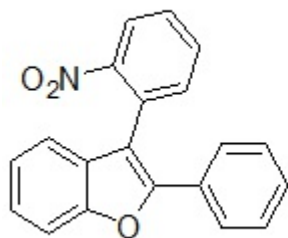

44

8.142  
8.139  
8.122  
8.119  
7.699  
7.696  
7.681  
7.677  
7.662  
7.658  
7.640  
7.635  
7.620  
7.616  
7.601  
7.597  
7.592  
7.589  
7.587  
7.571  
7.569  
7.567  
7.560  
7.557  
7.554  
7.551  
7.549  
7.544  
7.541  
7.535  
7.521  
7.517  
7.502  
7.498  
7.365  
7.359  
7.350  
7.344  
7.338  
7.333  
7.329  
7.324  
7.320  
7.312  
7.306  
7.301  
7.242  
7.239  
7.222  
7.220  
7.211  
7.205

┌  
└  
┌┌┌┌┌┌  
└└└└└└

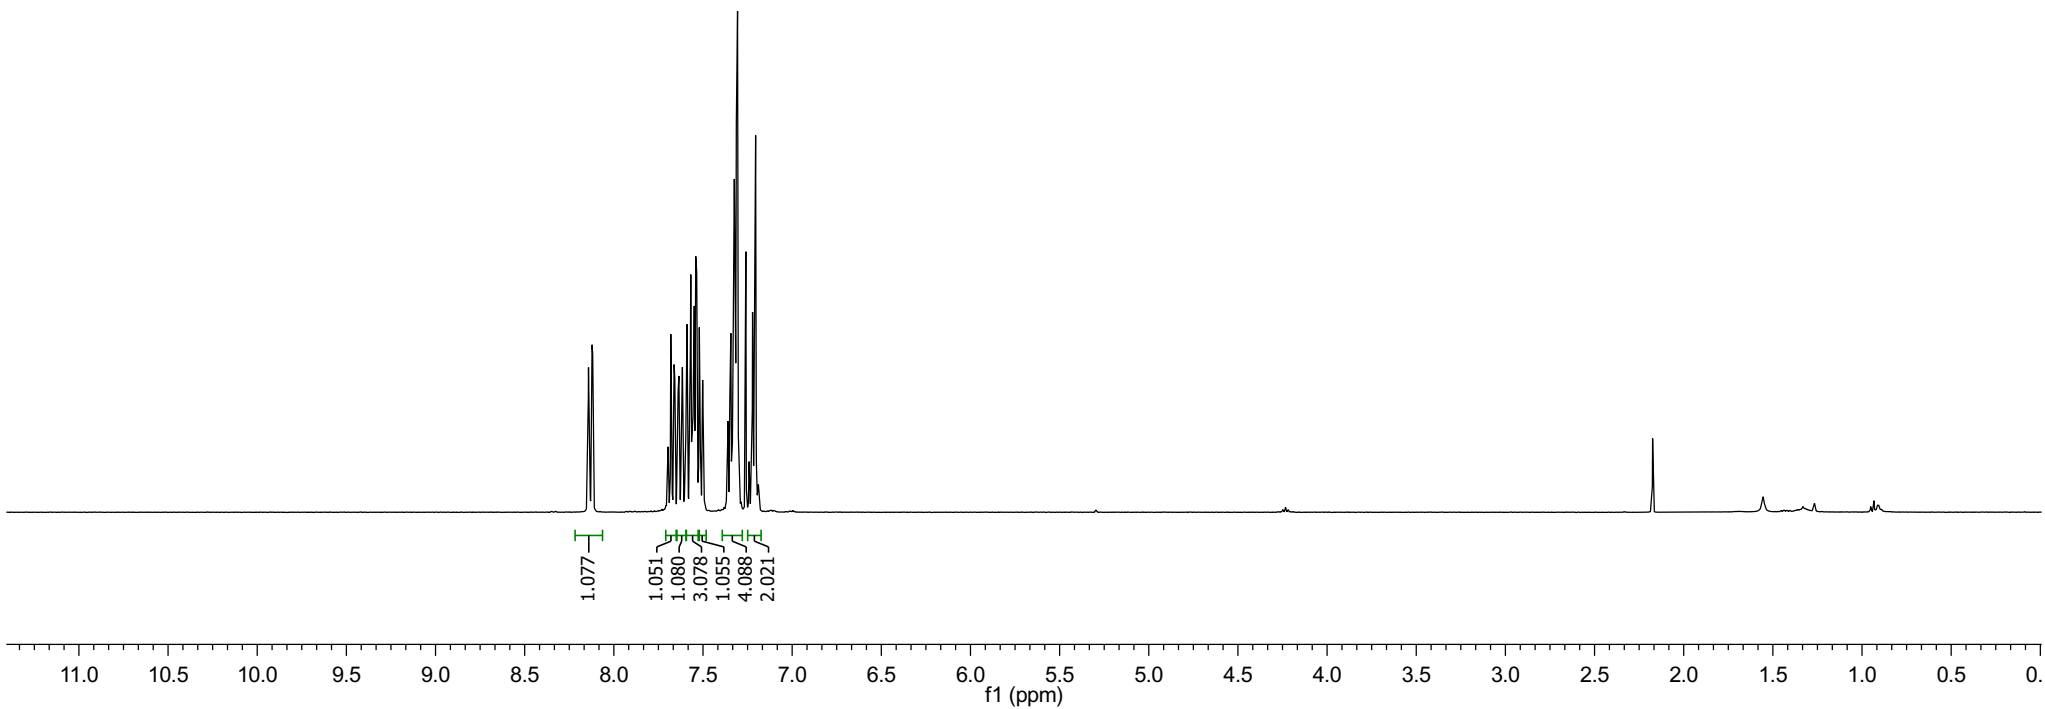

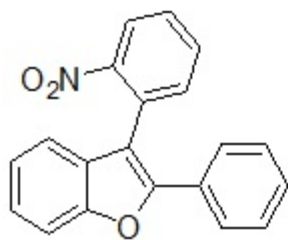

44

154.014  
151.346  
149.965  
133.594  
133.582  
130.116  
129.801  
129.381  
128.964  
128.853  
128.208  
126.900  
125.217  
125.178  
123.463  
119.458  
113.369  
111.566

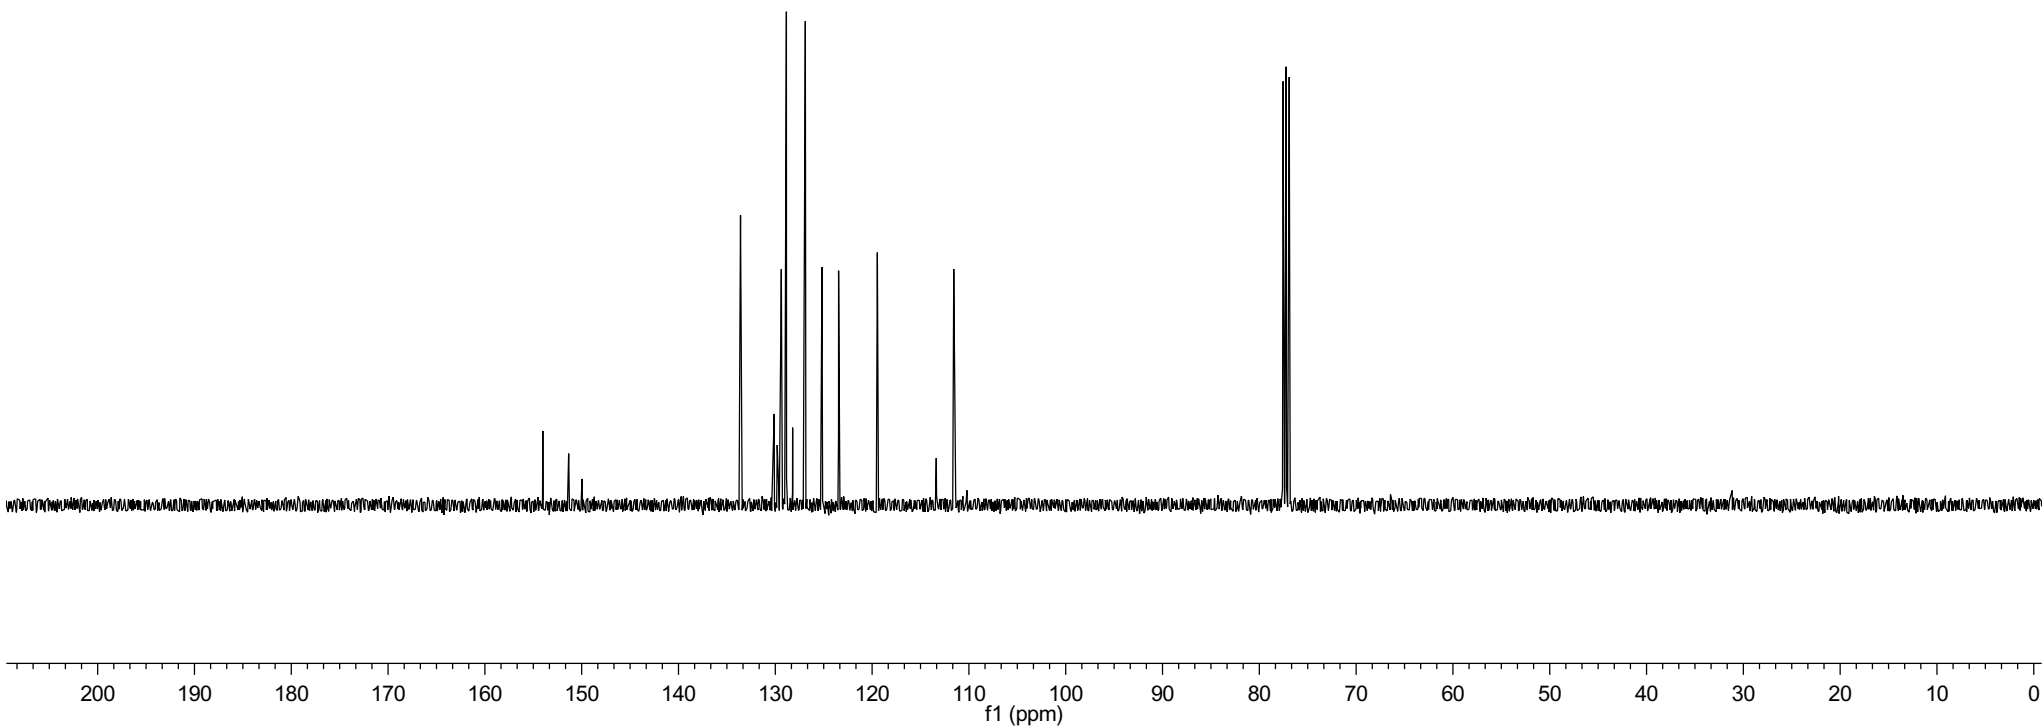

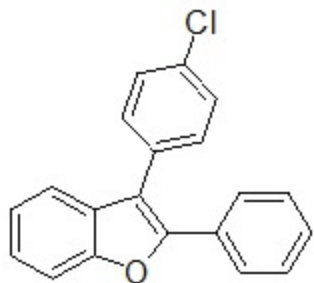

46

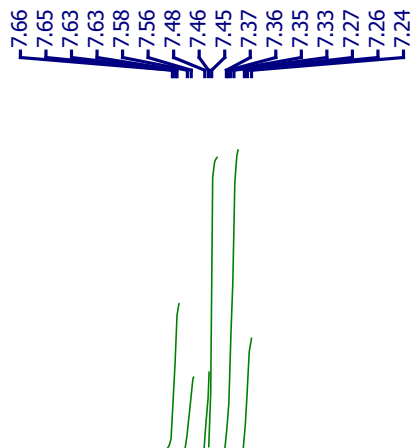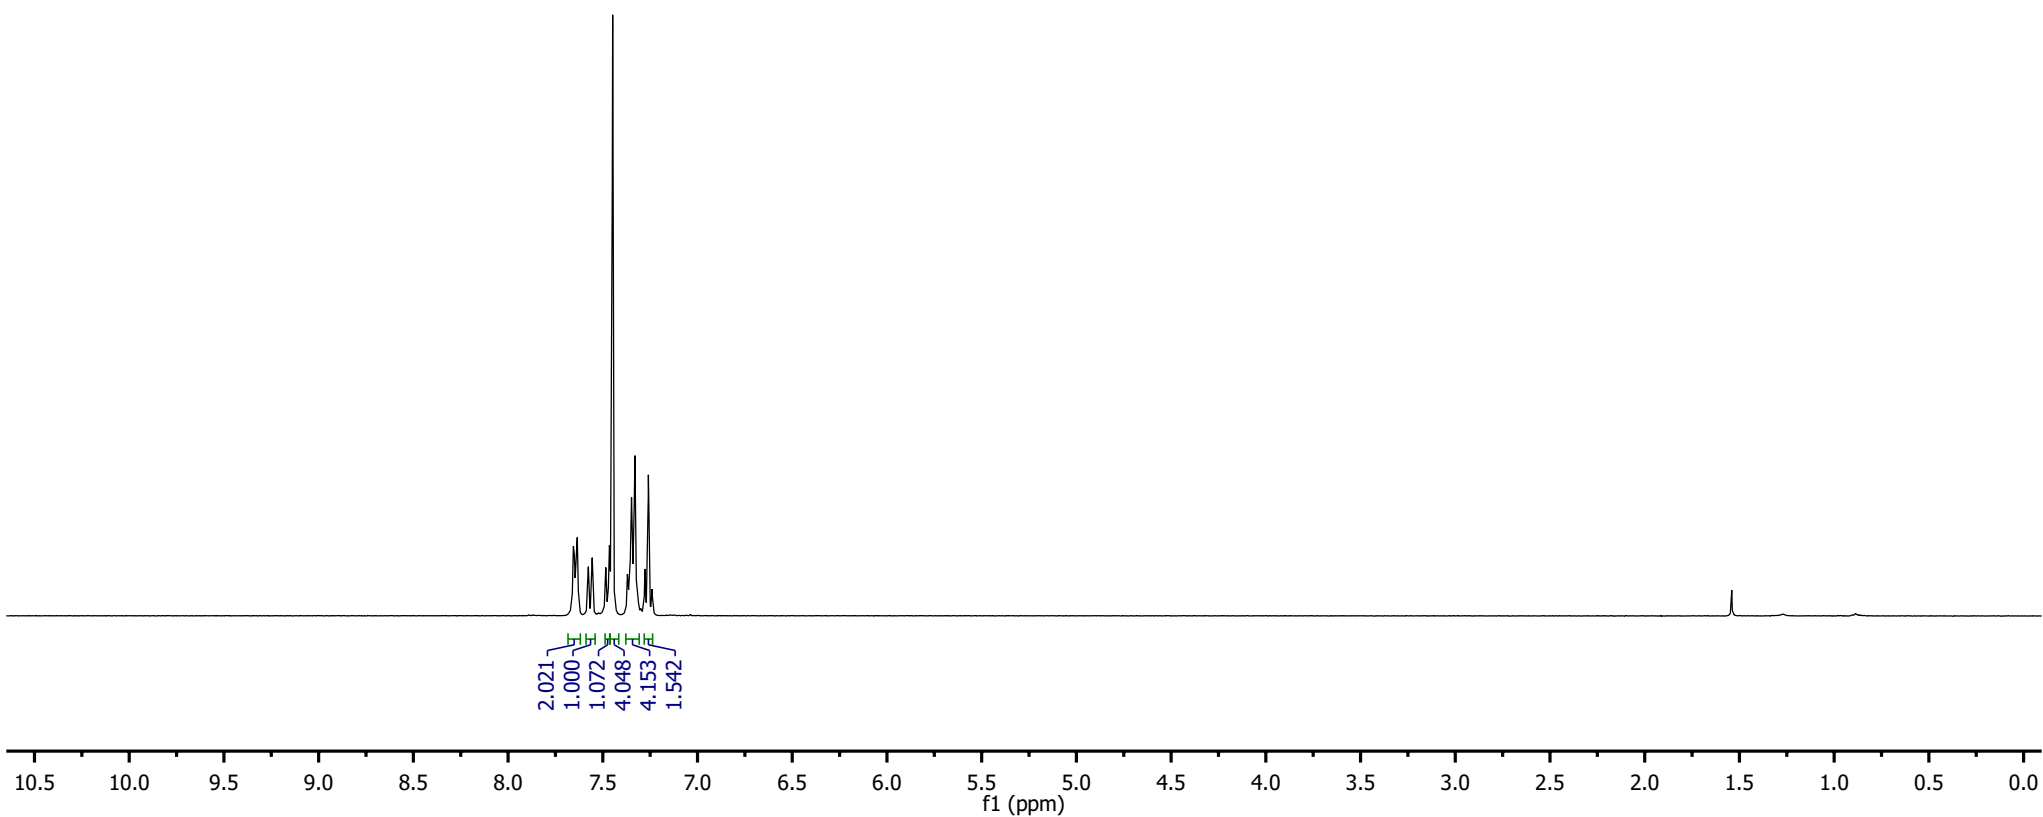



46

150.97  
143.71  
133.71  
131.54  
131.27  
130.54  
130.00  
129.48  
128.80  
128.74  
127.27  
125.06  
123.27  
119.94  
111.43

77.55 CDCl3  
77.23 CDCl3  
76.91 CDCl3

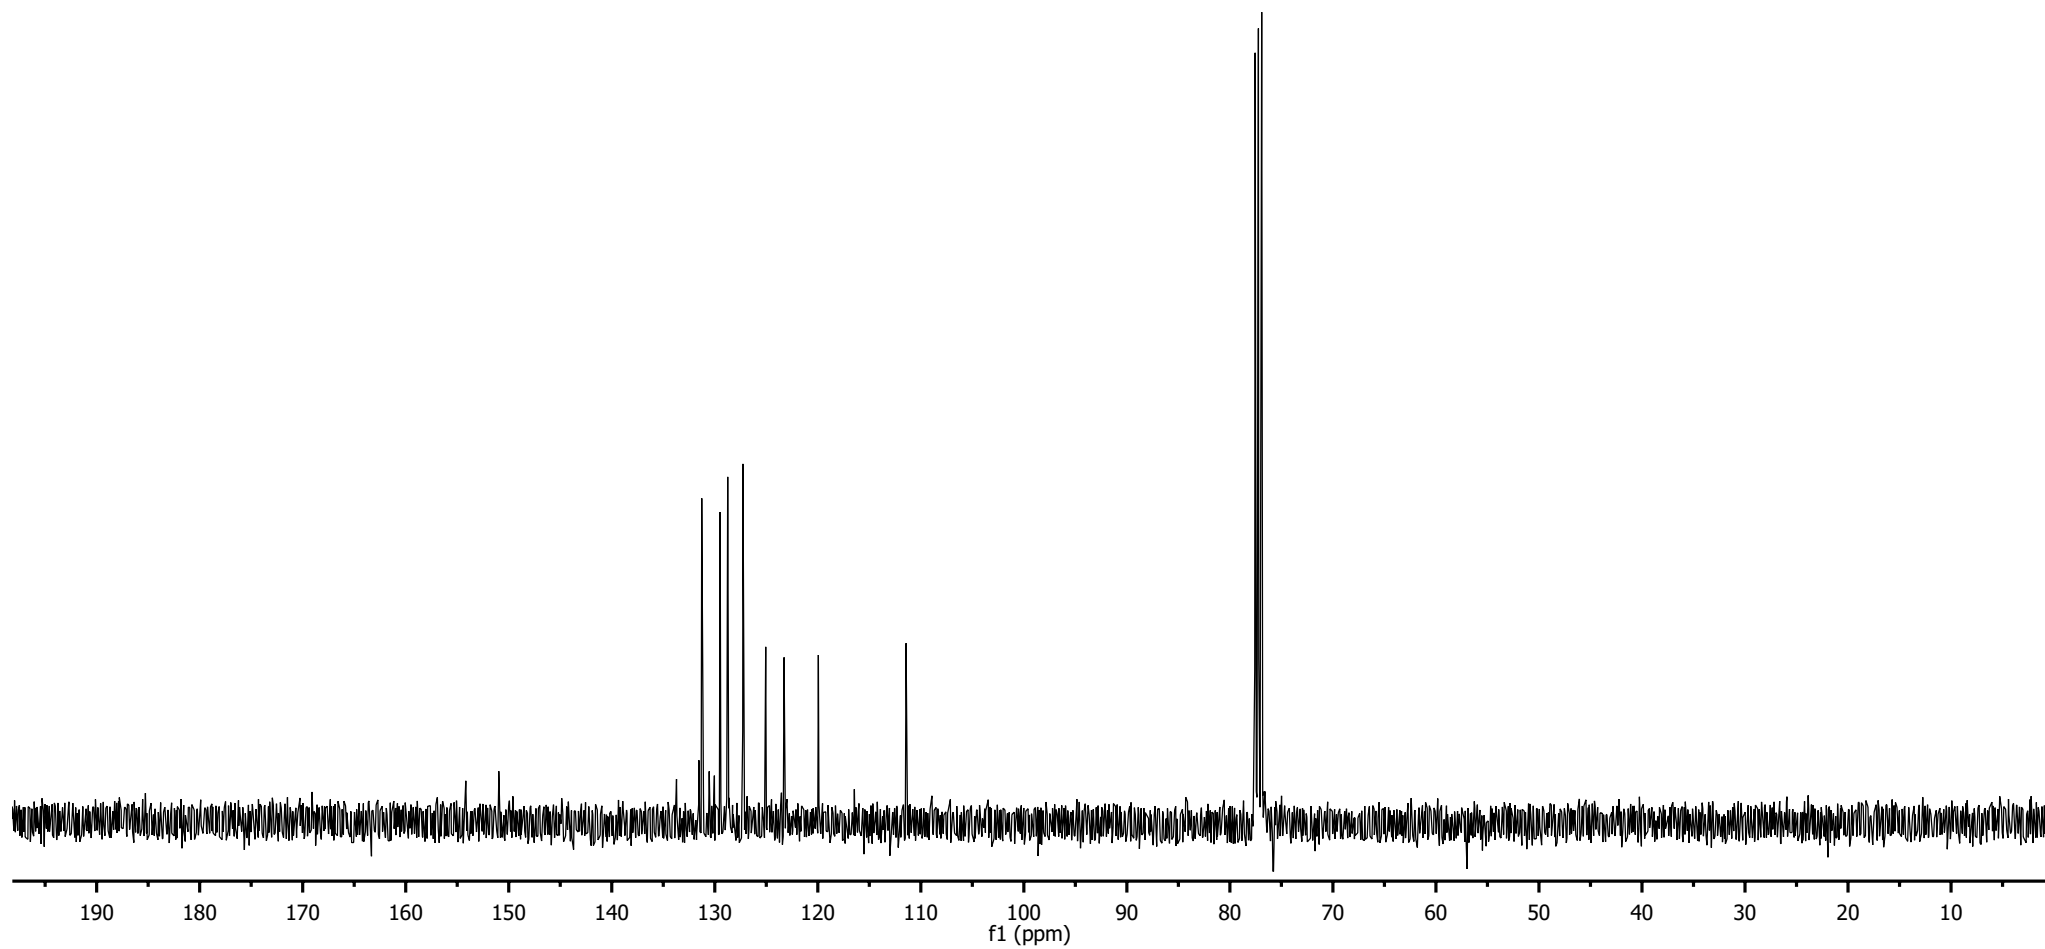



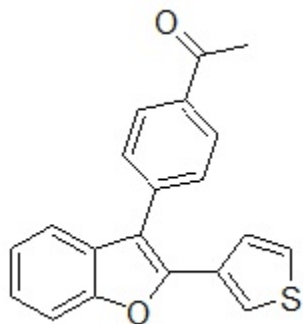

48

8.10  
8.08  
7.67  
7.65  
7.64  
7.63  
7.56  
7.54  
7.48  
7.46  
7.37  
7.35  
7.33  
7.29  
7.28  
7.27  
7.26  
7.24  
7.21  
7.19

2.68

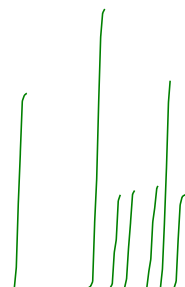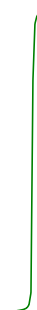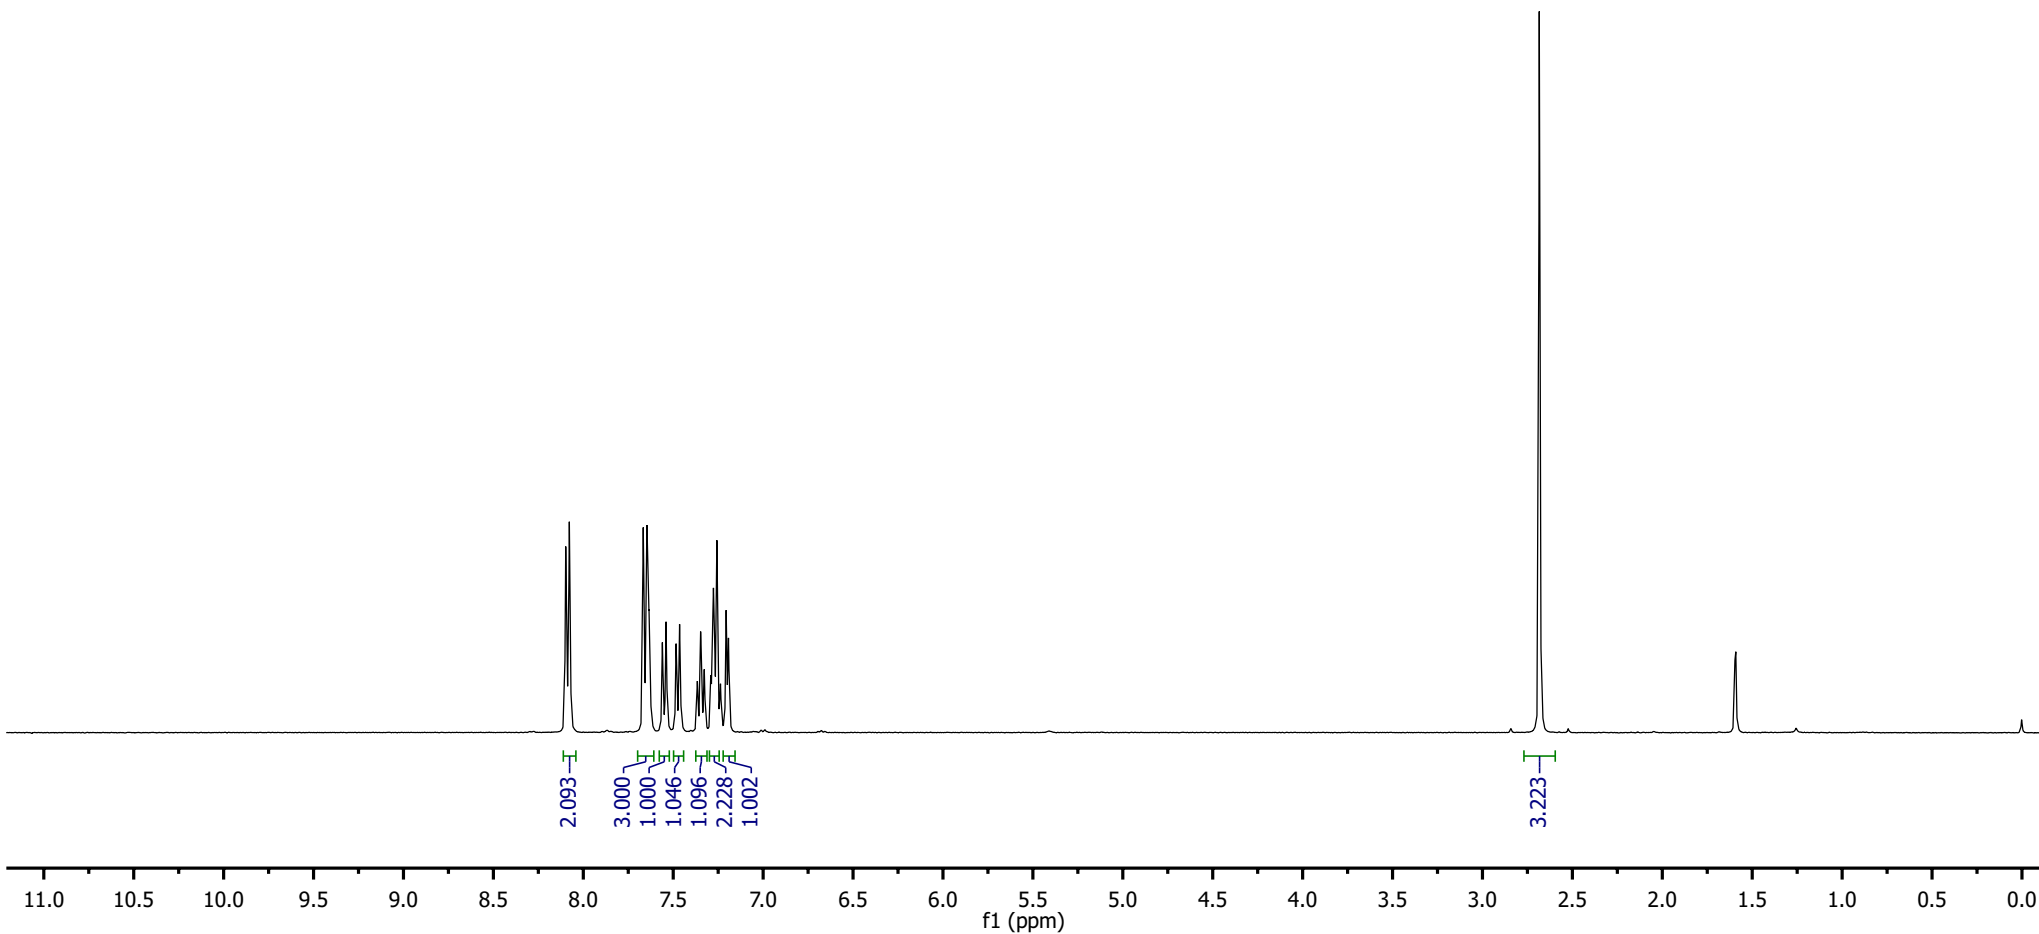

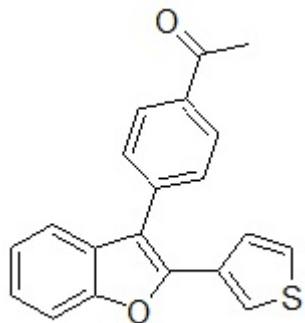

48

197.88

154.02

148.32

138.11

136.50

131.55

130.23

129.62

129.14

126.25

126.13

125.06

123.87

123.41

119.81

115.79

111.37

77.55 CDCl3

77.23 CDCl3

76.91 CDCl3

26.93

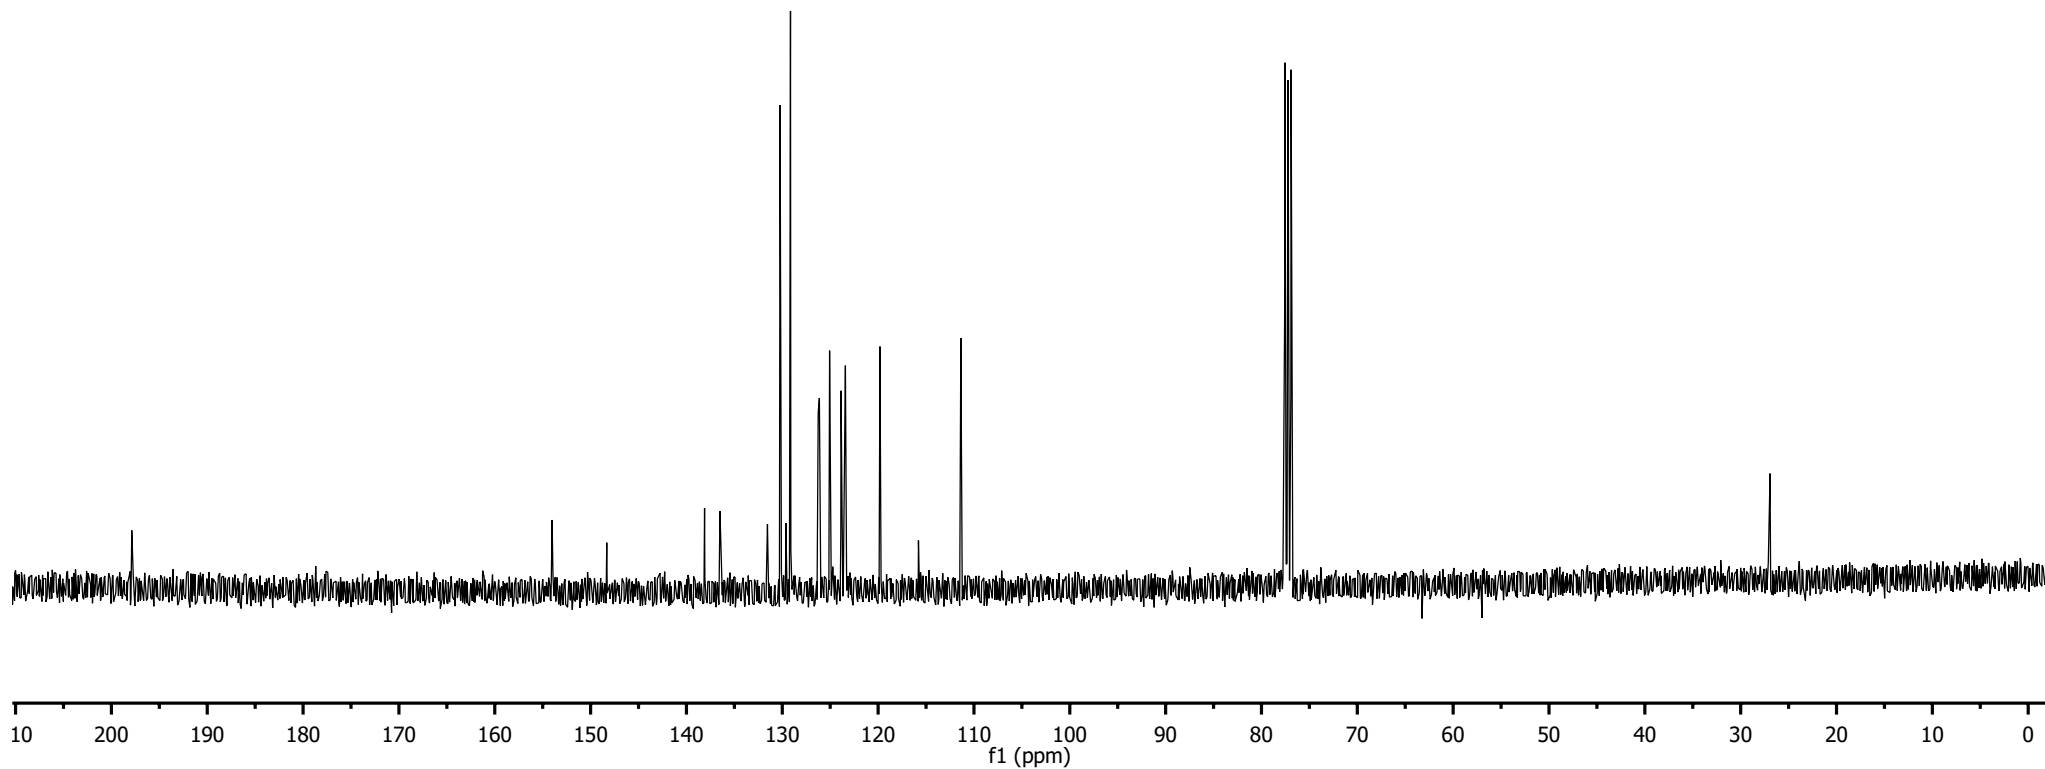

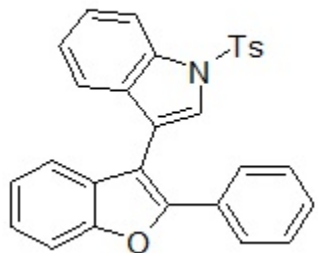

50

8.14  
8.12  
7.86  
7.84  
7.76  
7.62  
7.60  
7.59  
7.39  
7.38  
7.36  
7.33  
7.30  
7.28  
7.26  
7.26  
7.25  
7.24  
7.22  
7.20  
7.16  
7.14  
7.12

4.17  
4.15  
4.13  
4.11

2.40

2.06

1.29  
1.28  
1.26

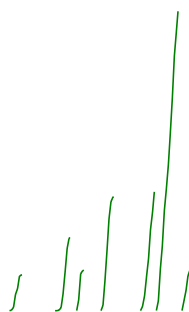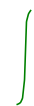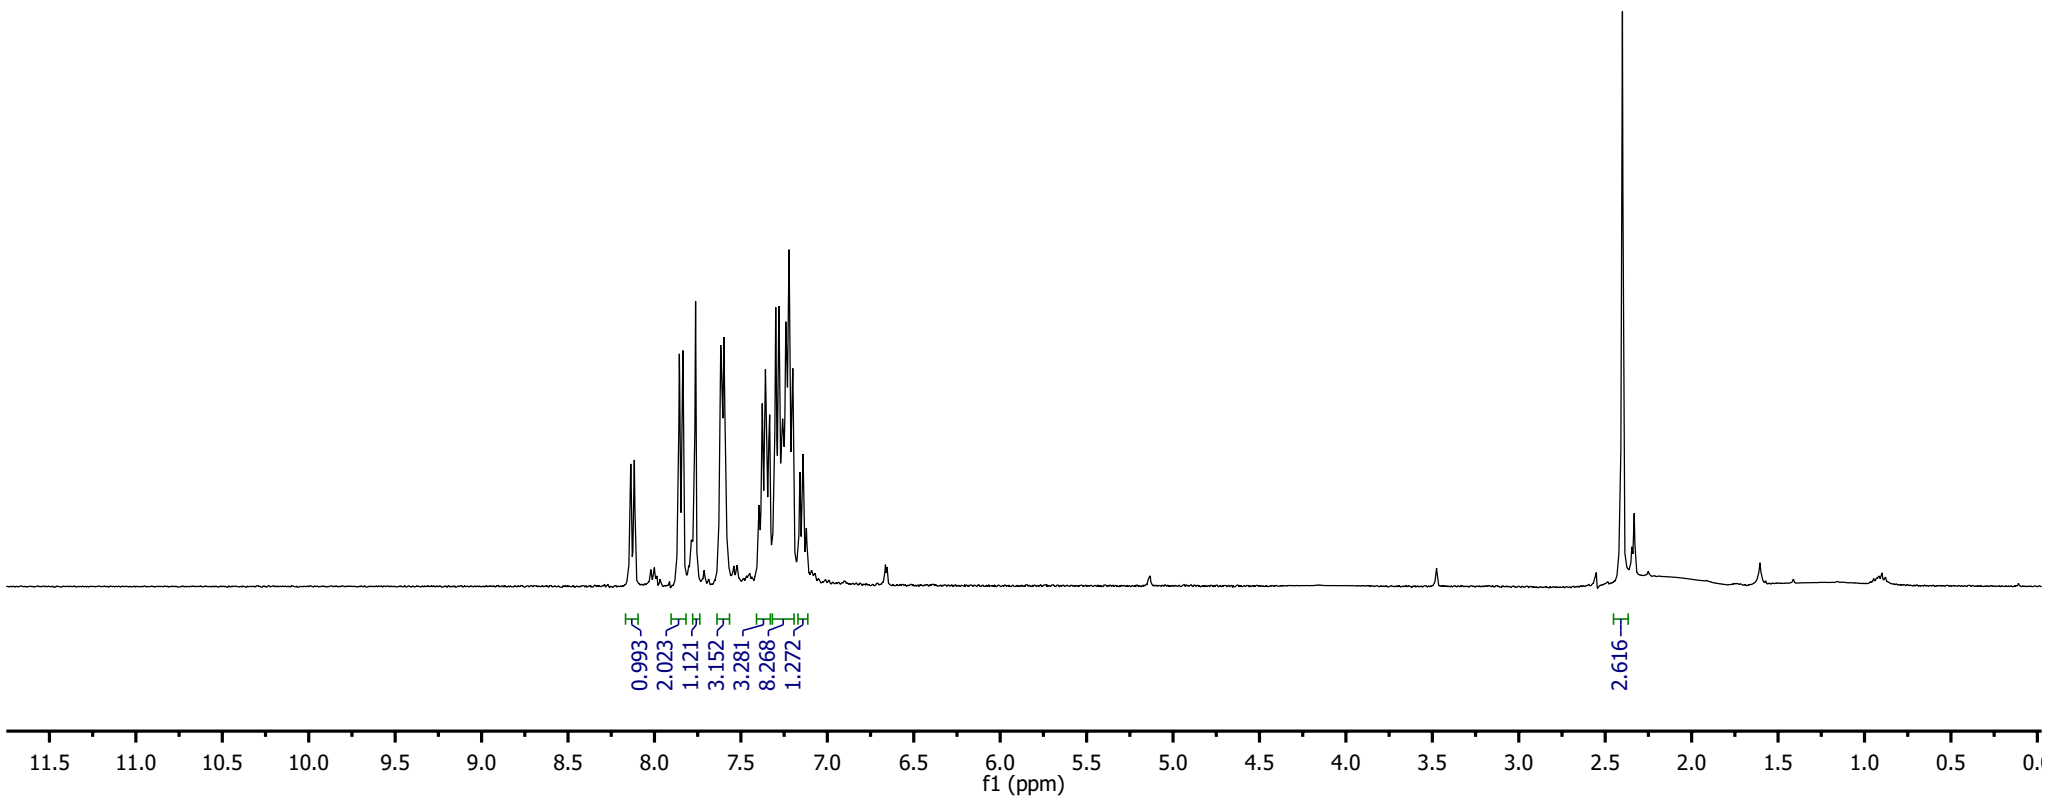

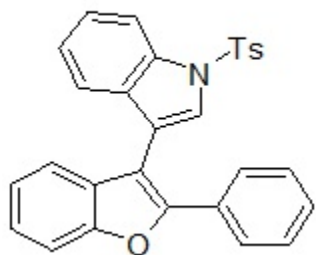

50

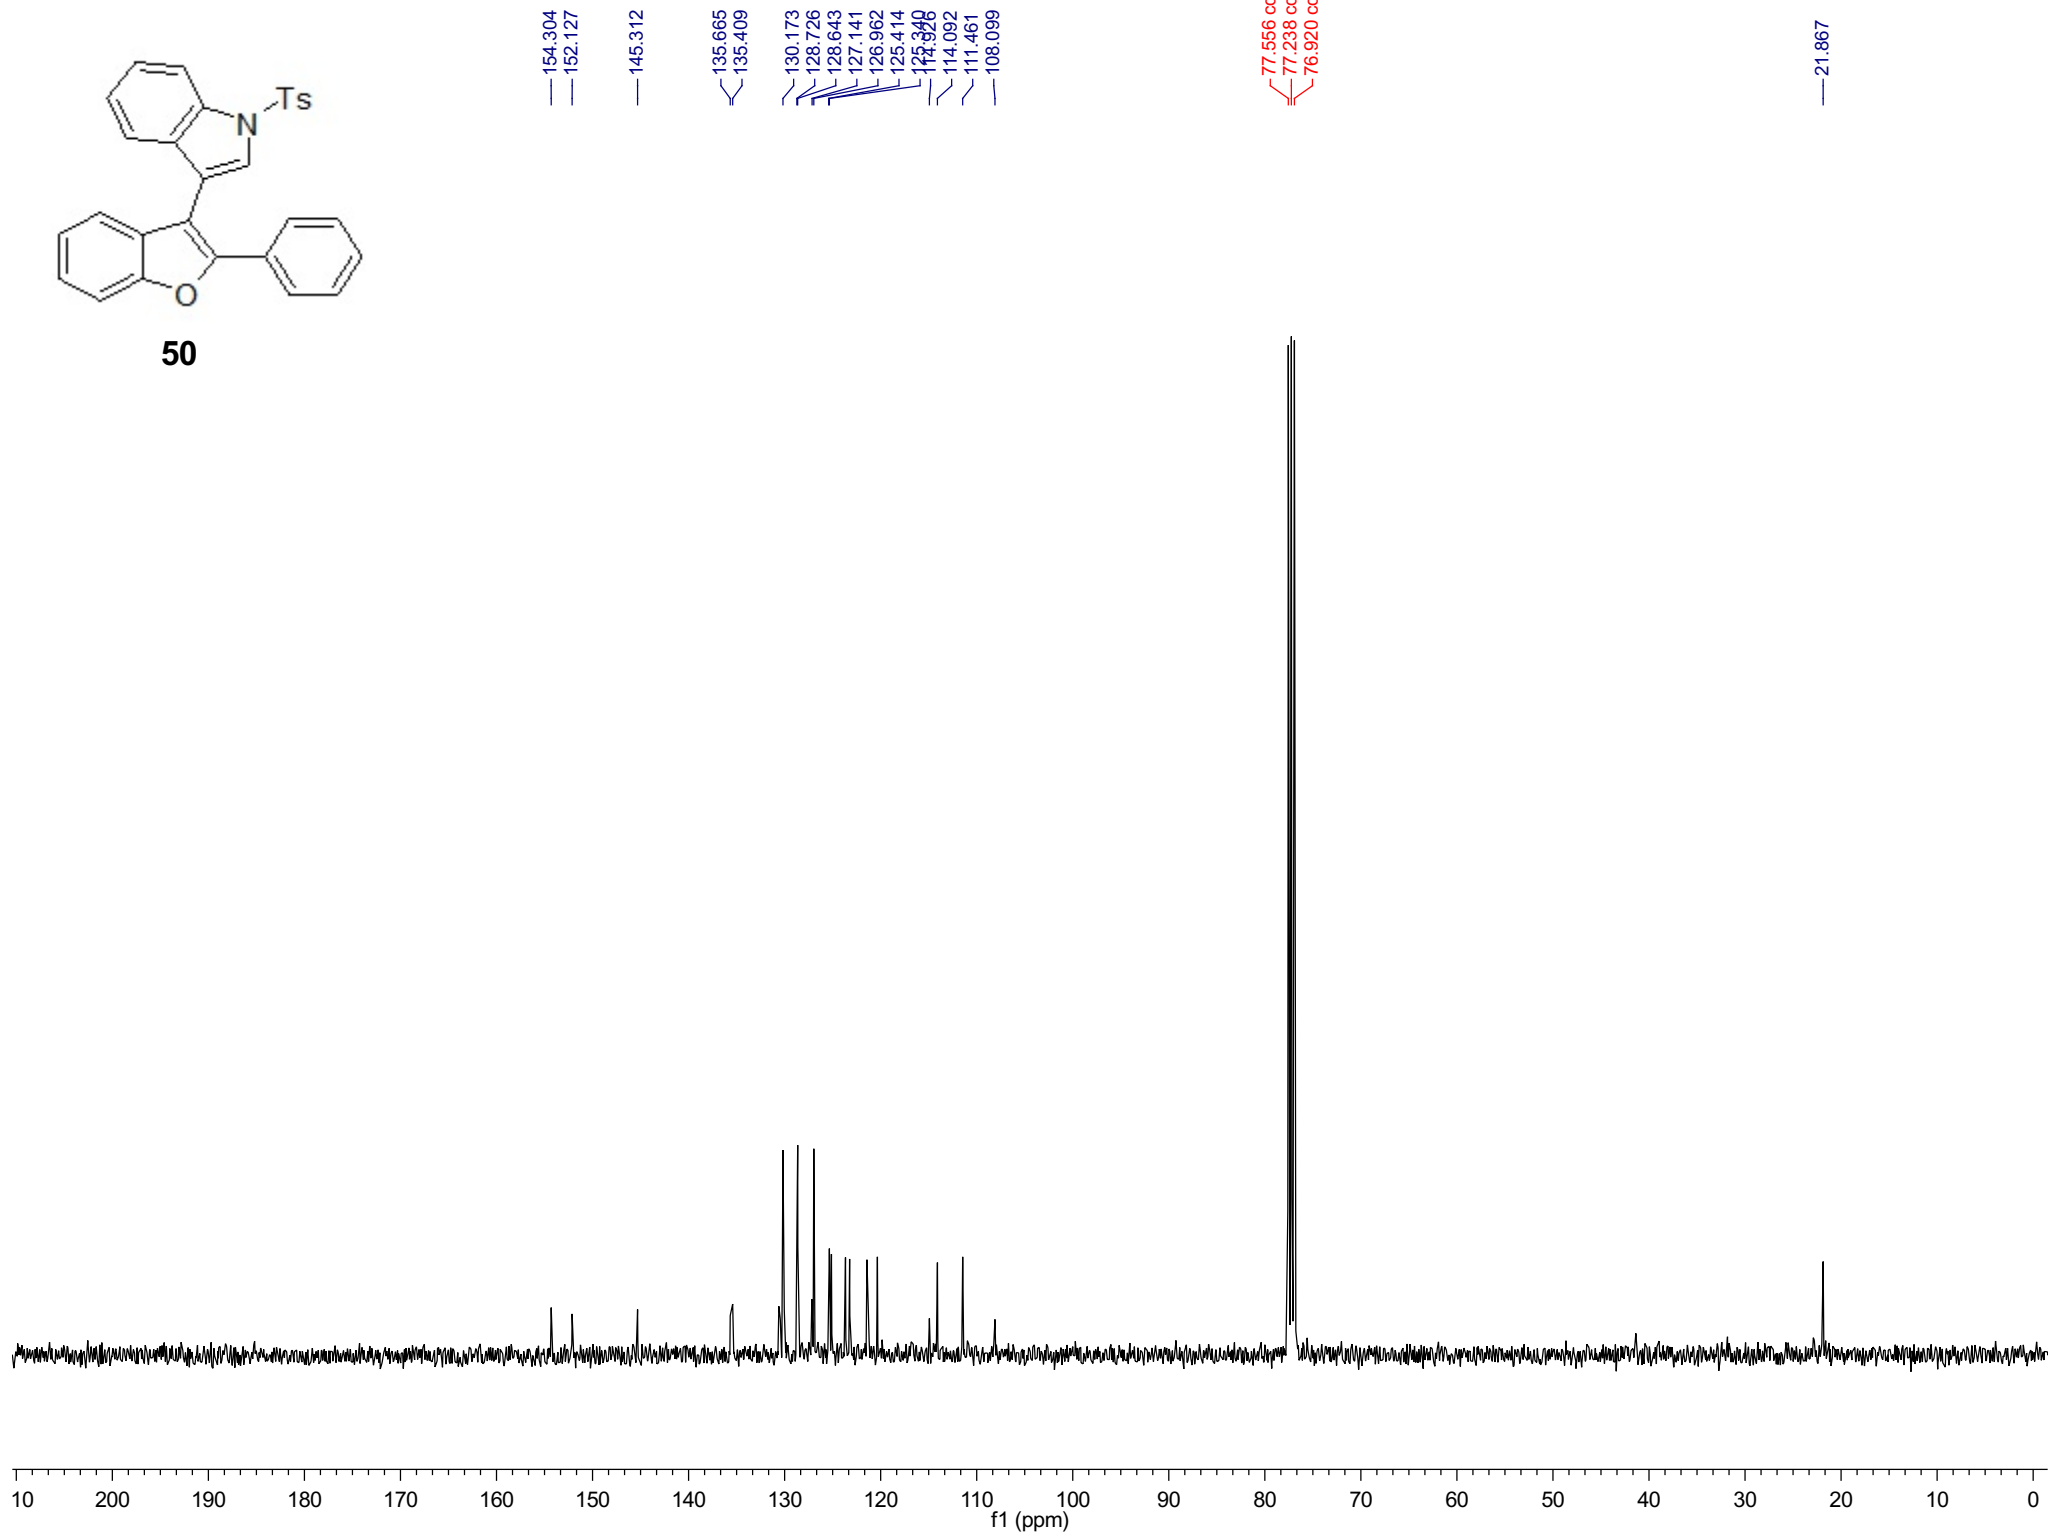

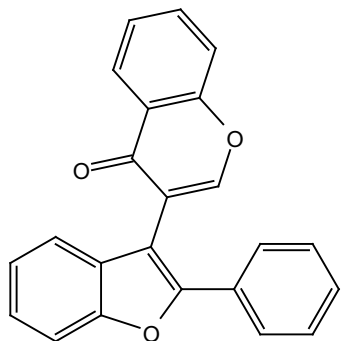

52

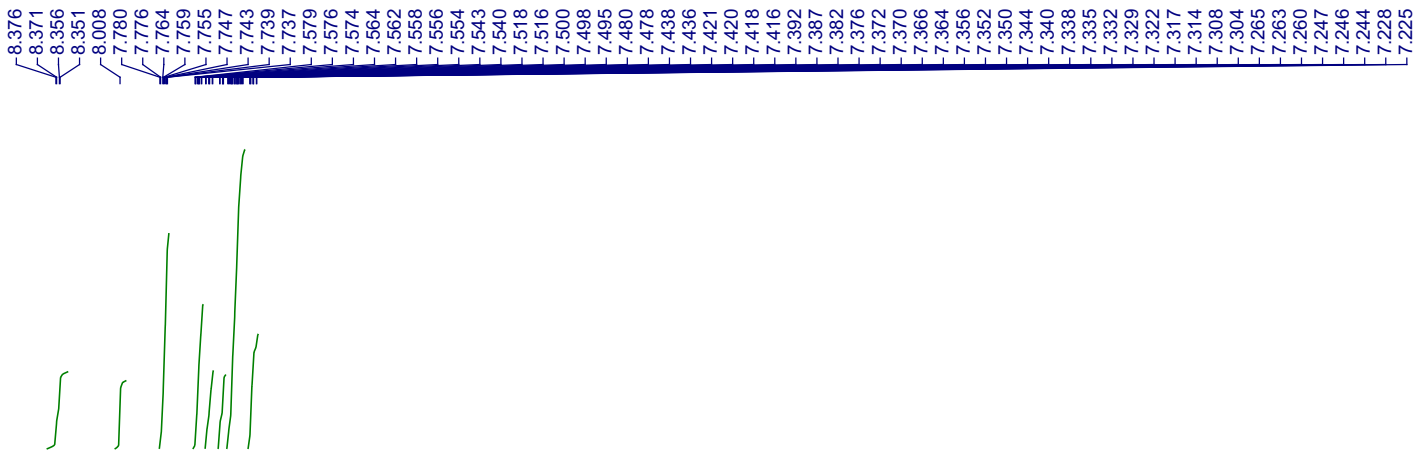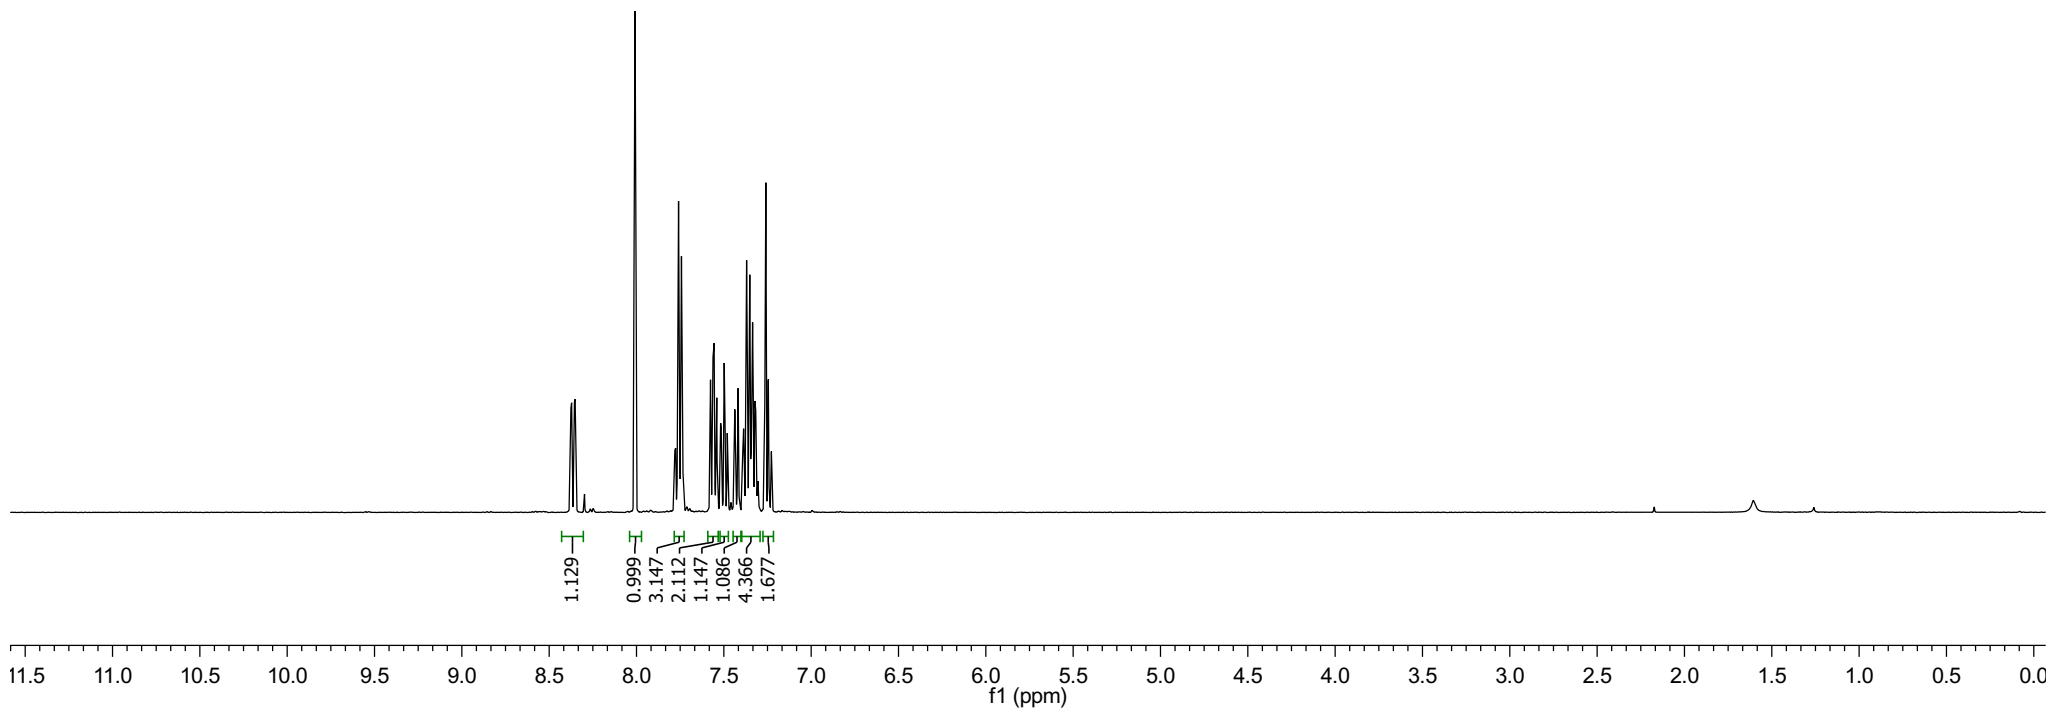



52

176.237

156.658  
155.422  
154.319  
153.091

134.119  
130.530  
130.367  
128.918  
128.856  
127.264  
126.738  
125.755  
125.031  
124.543  
123.300  
120.483  
118.486  
118.273  
117.462  
107.758

77.548 cdcl3  
77.230 cdcl3  
76.913 cdcl3

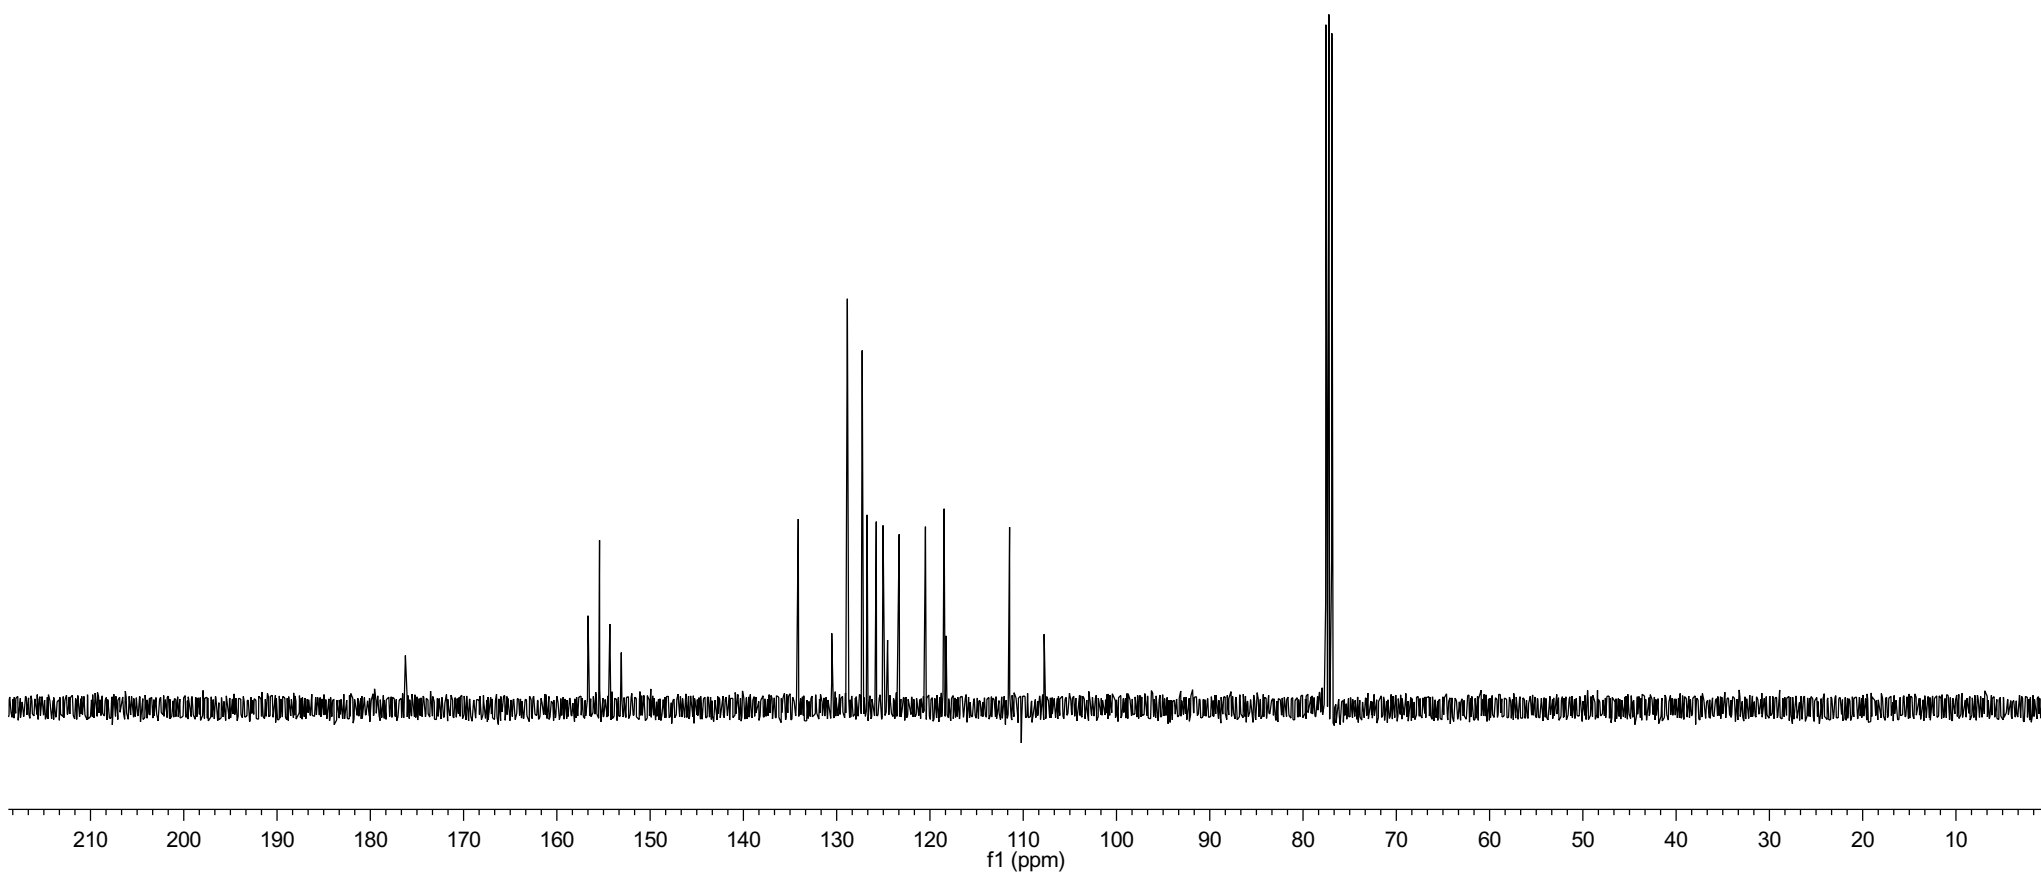

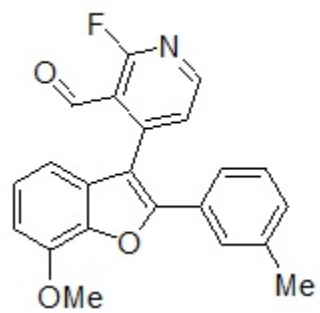

55

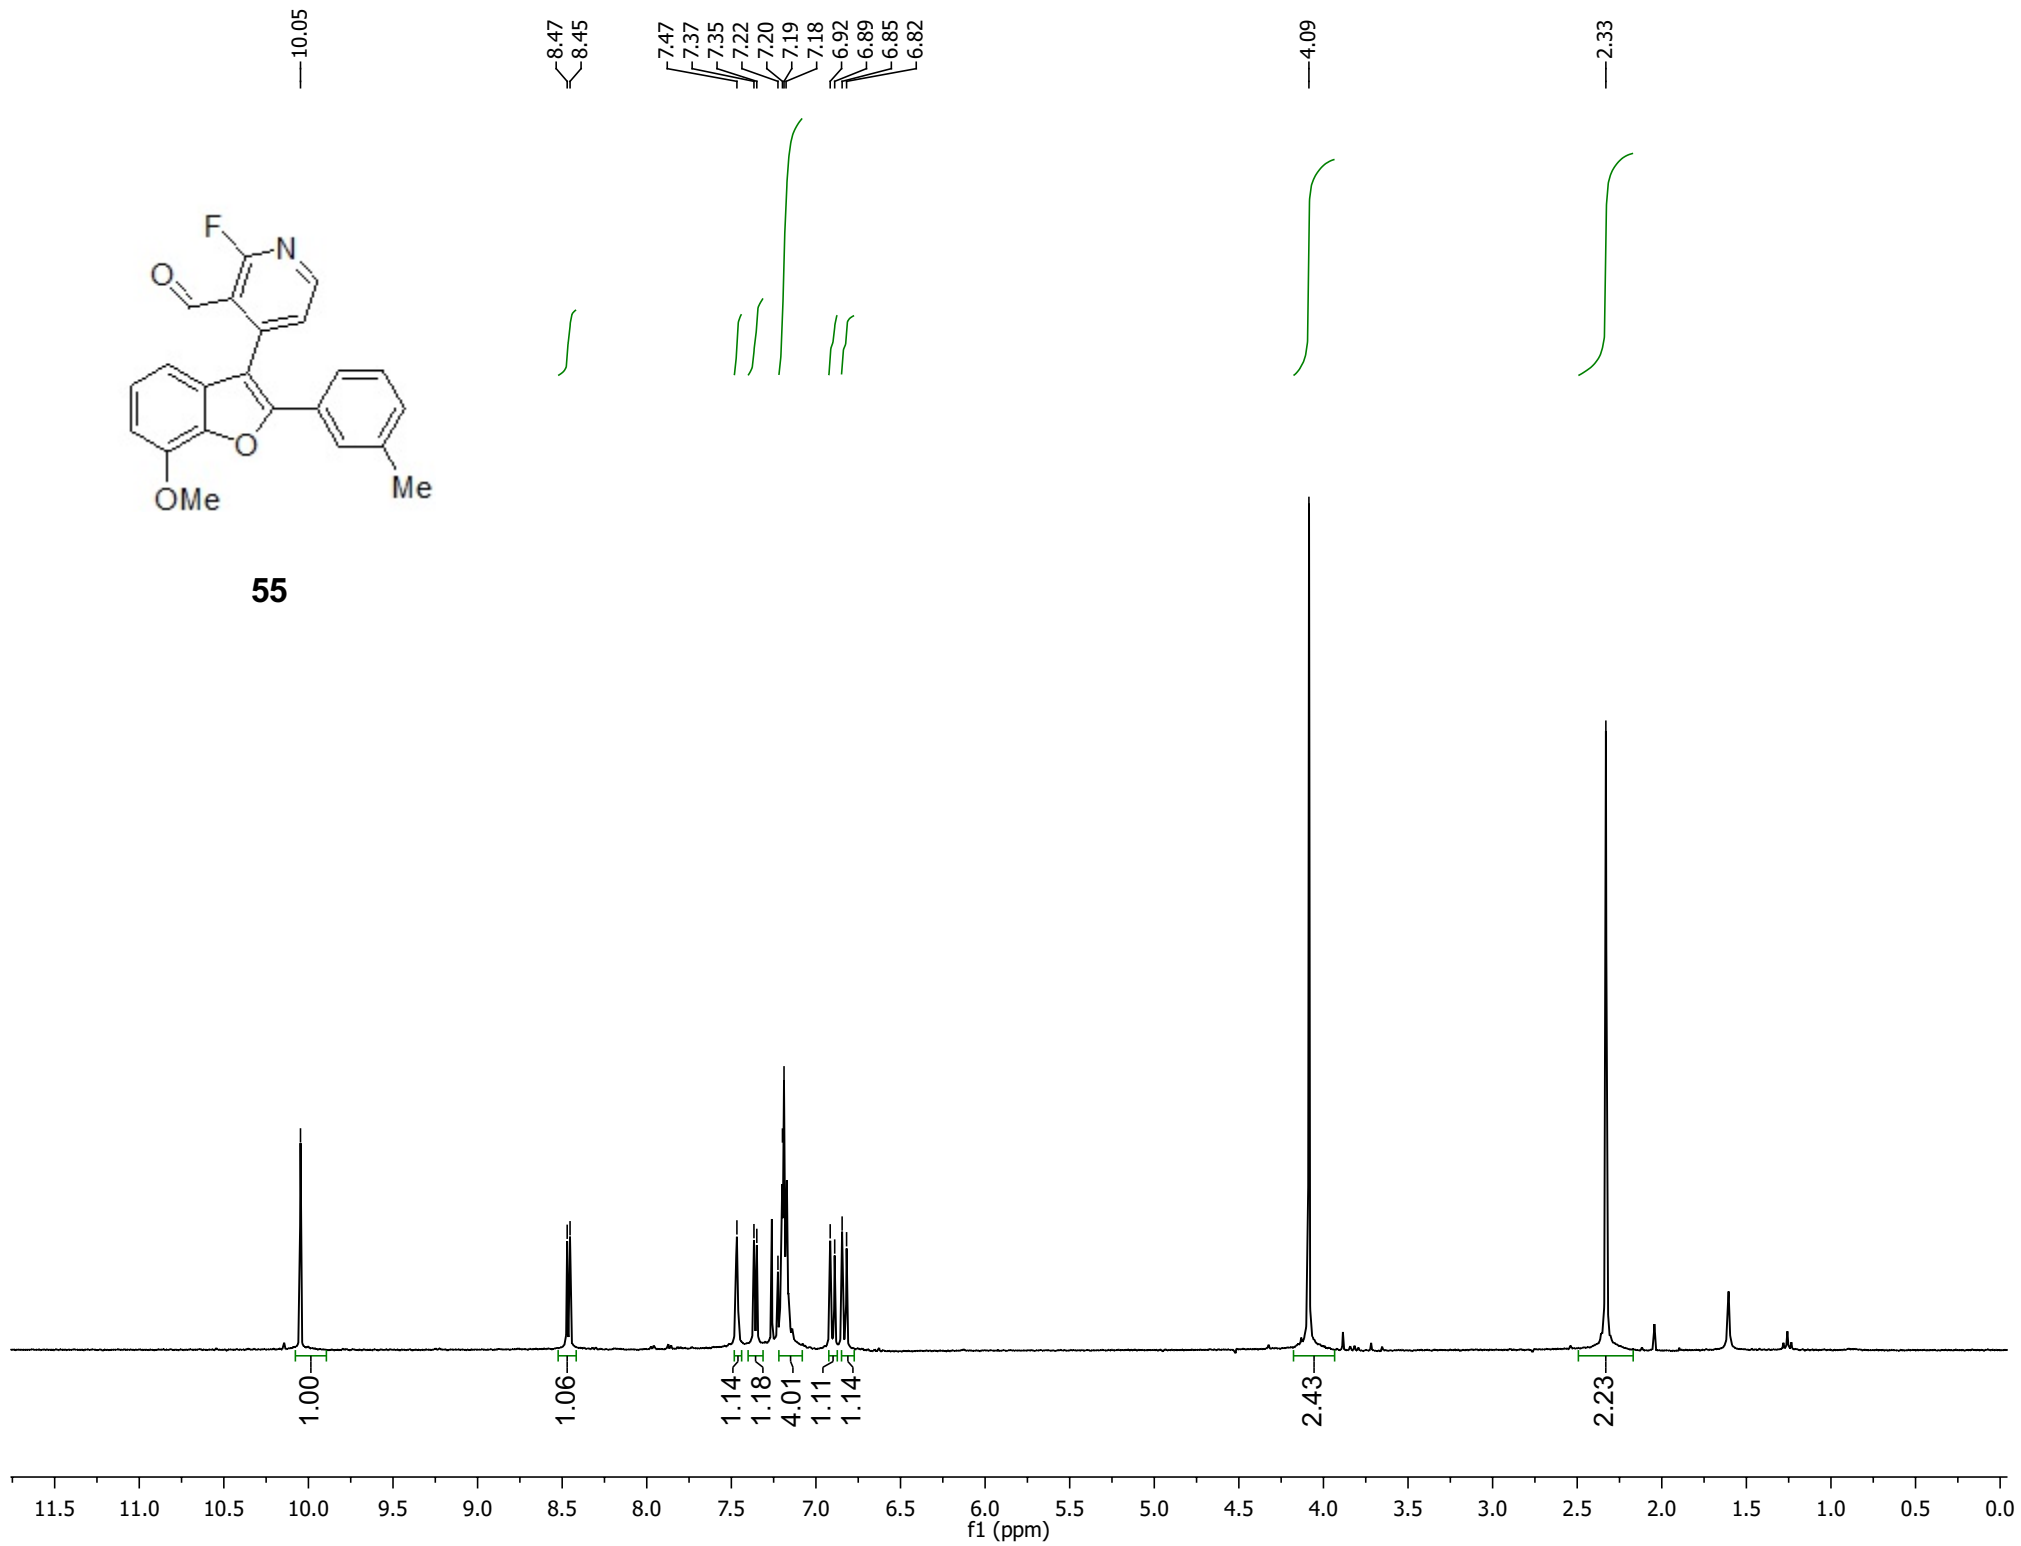

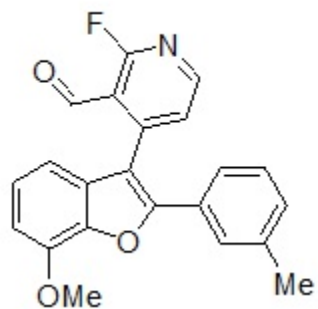

55

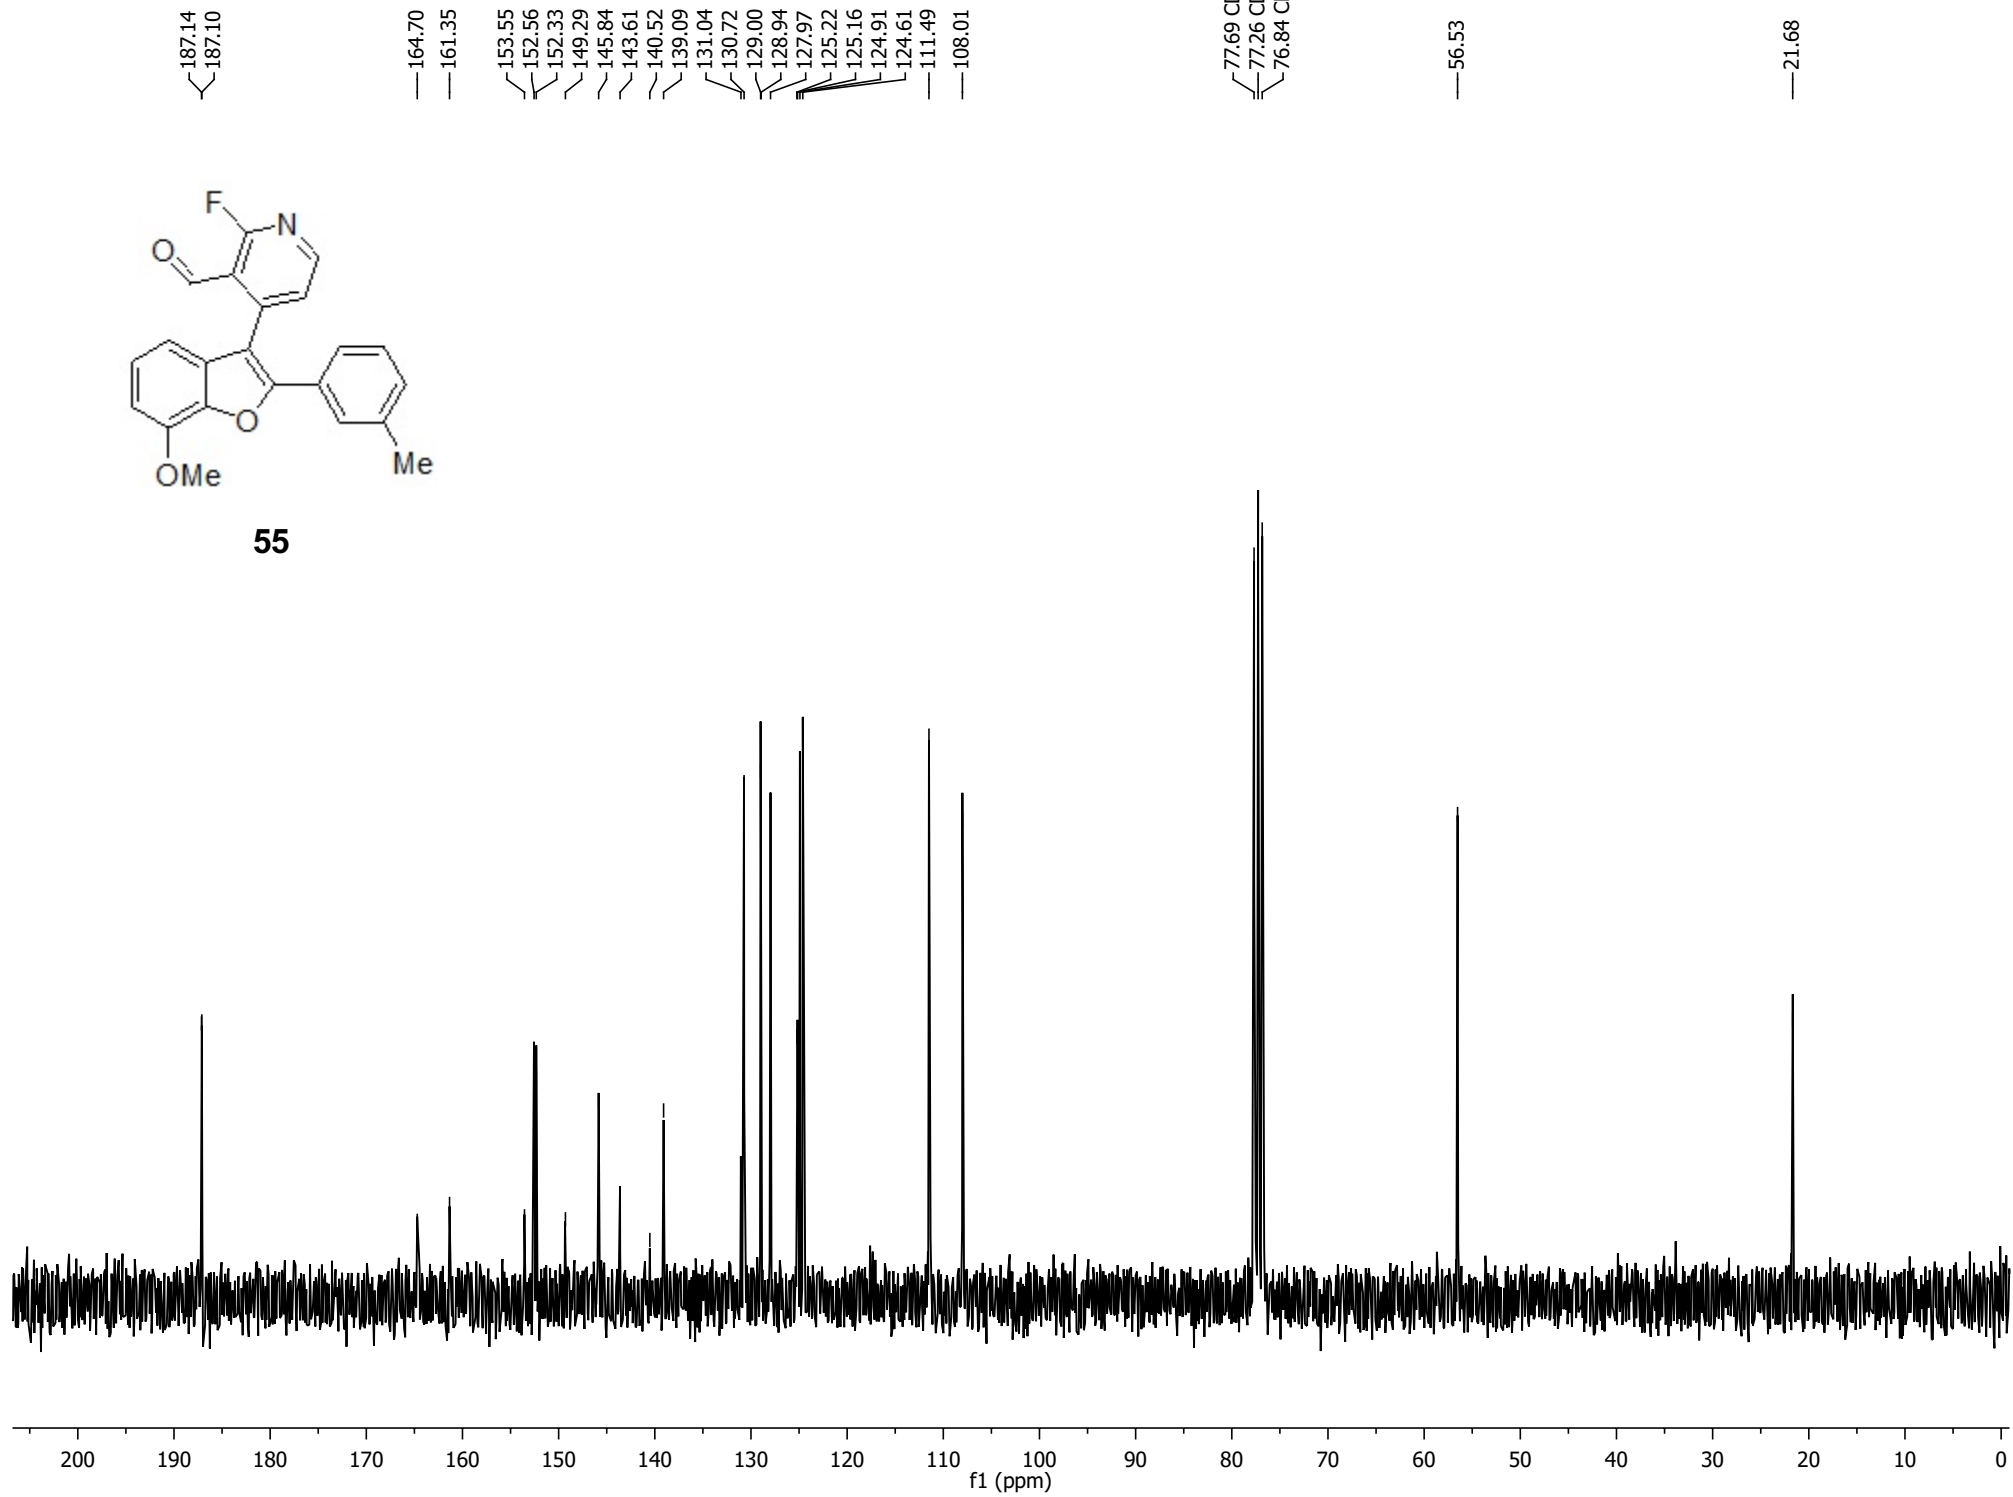



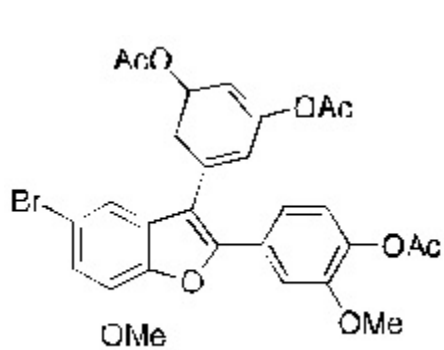

59

7.358  
7.337  
7.208  
7.153  
7.094  
7.091  
7.039  
7.018  
6.996  
6.954

4.028

3.666

2.308  
2.291

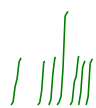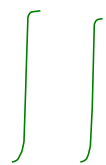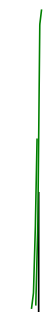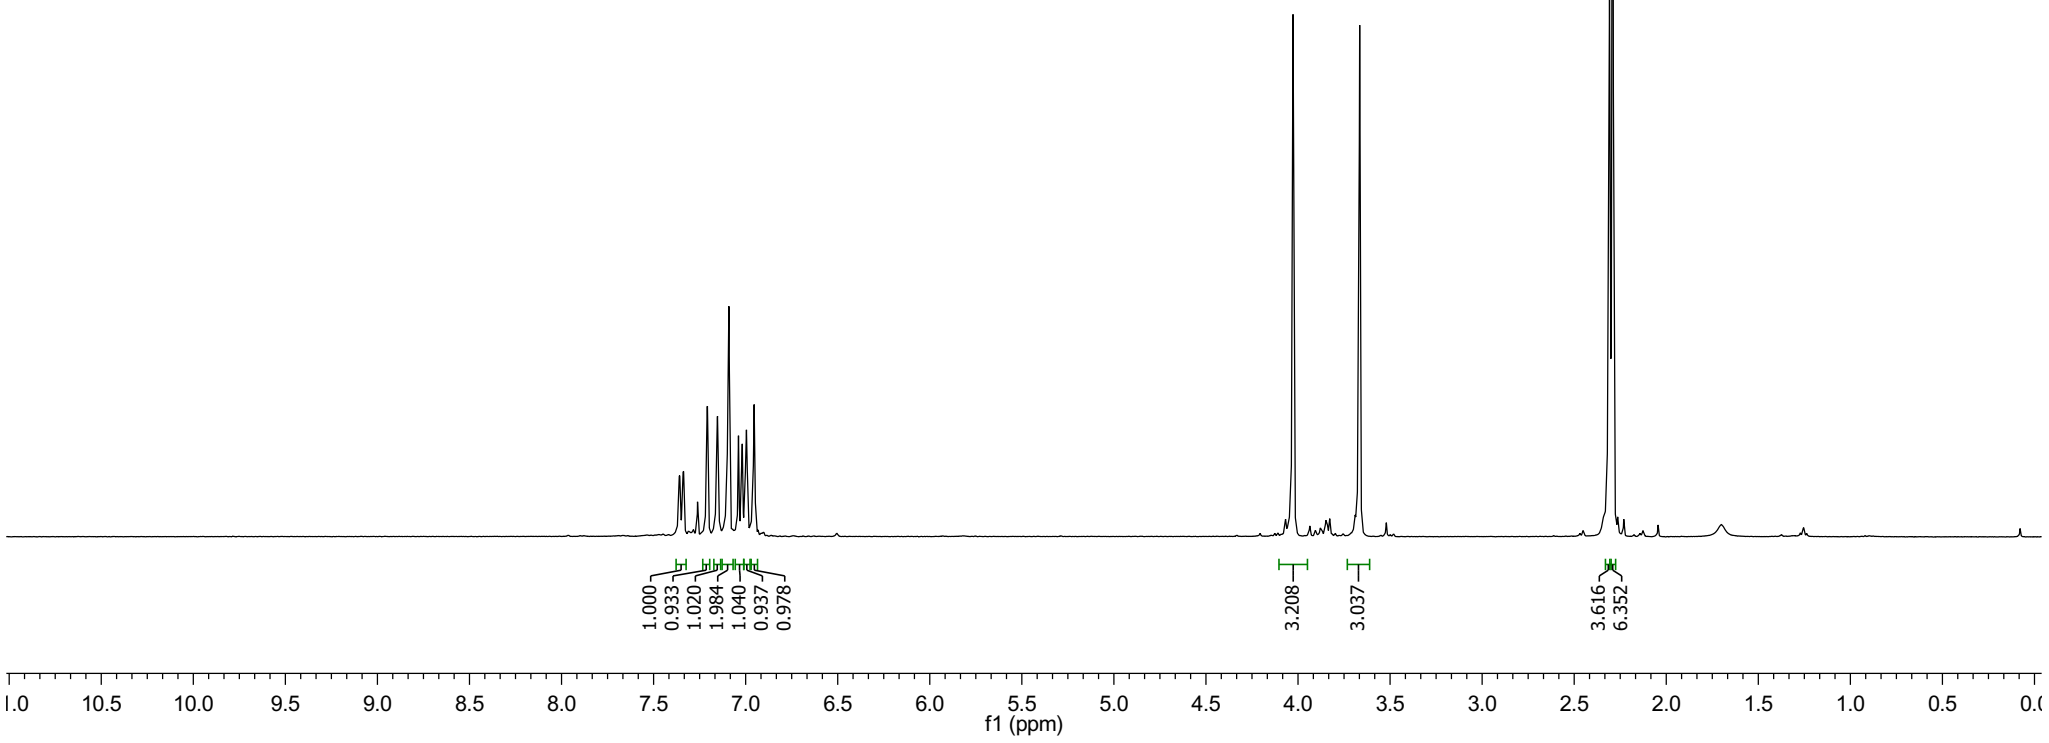

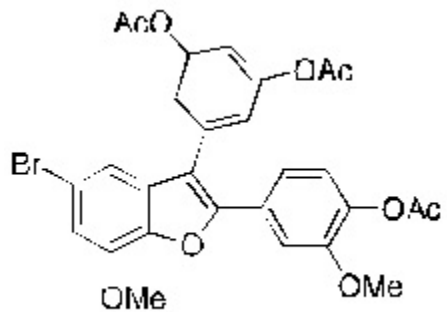

59

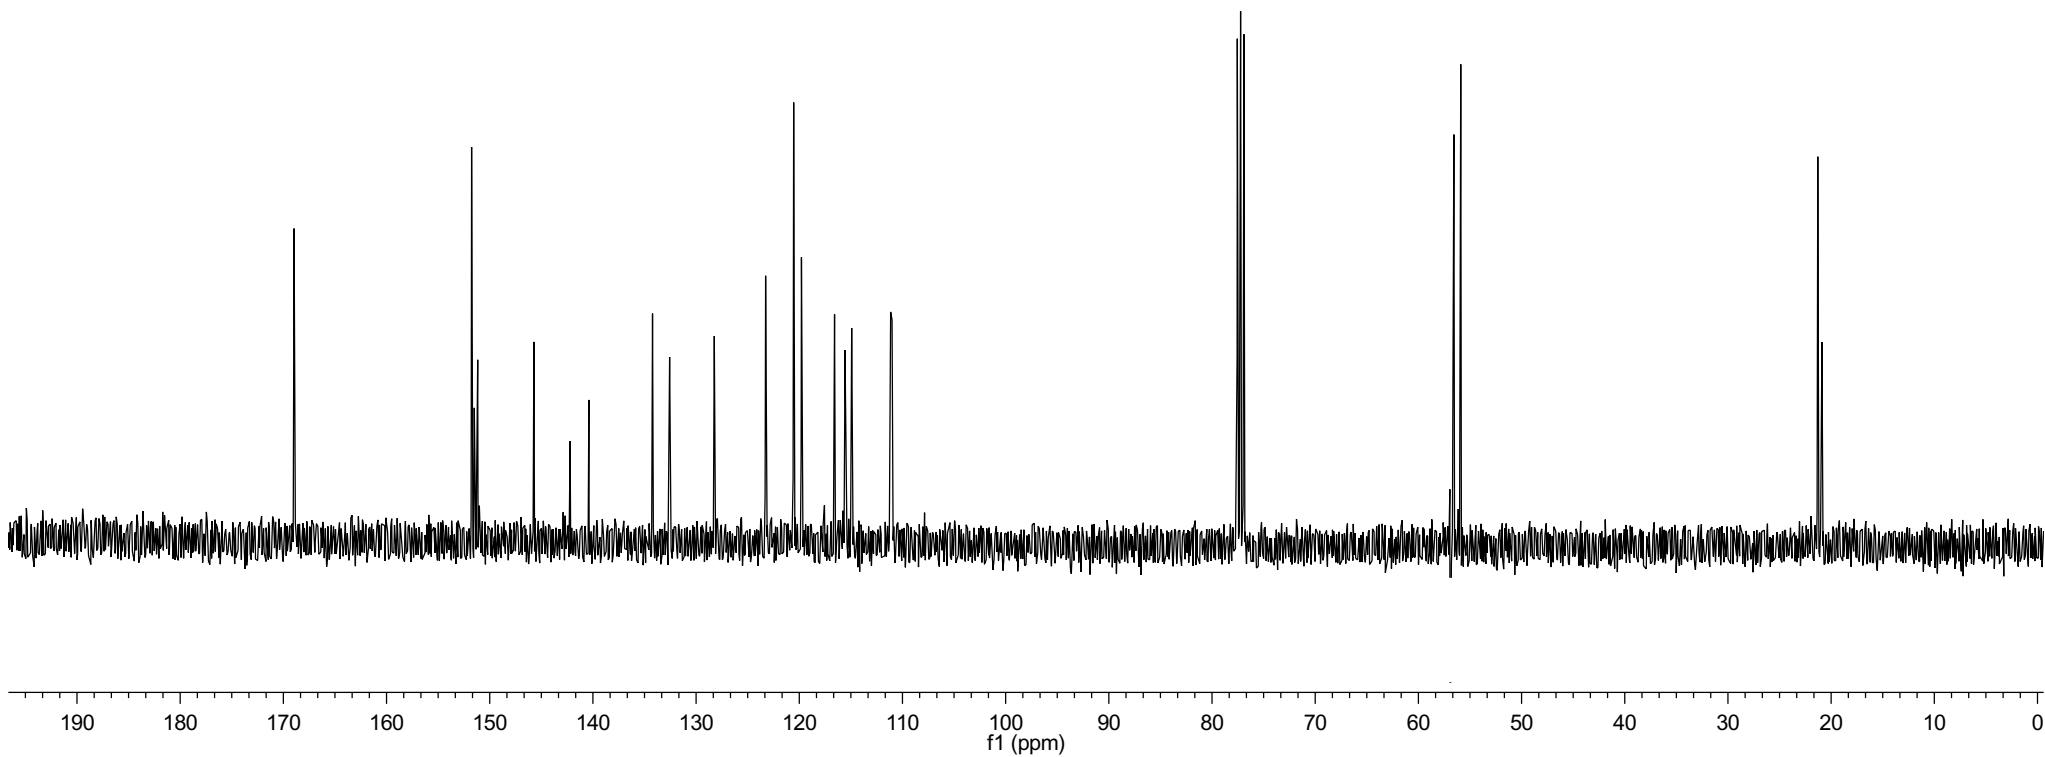

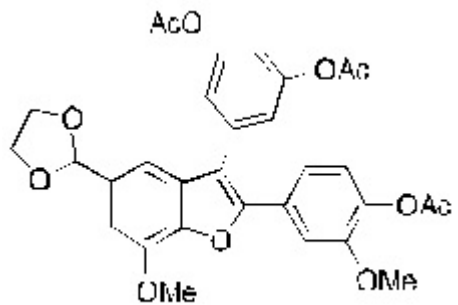

61

7.385  
7.380  
7.364  
7.359  
7.212  
7.178  
7.124  
7.118  
7.037  
7.014  
7.009  
6.995  
6.989  
6.984

5.840

4.189  
4.175  
4.171  
4.166  
4.162  
4.154  
4.071  
4.056  
4.047  
4.042  
4.039  
4.037  
4.021  
3.668

2.303  
2.281

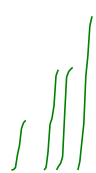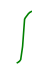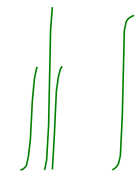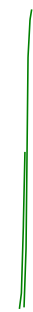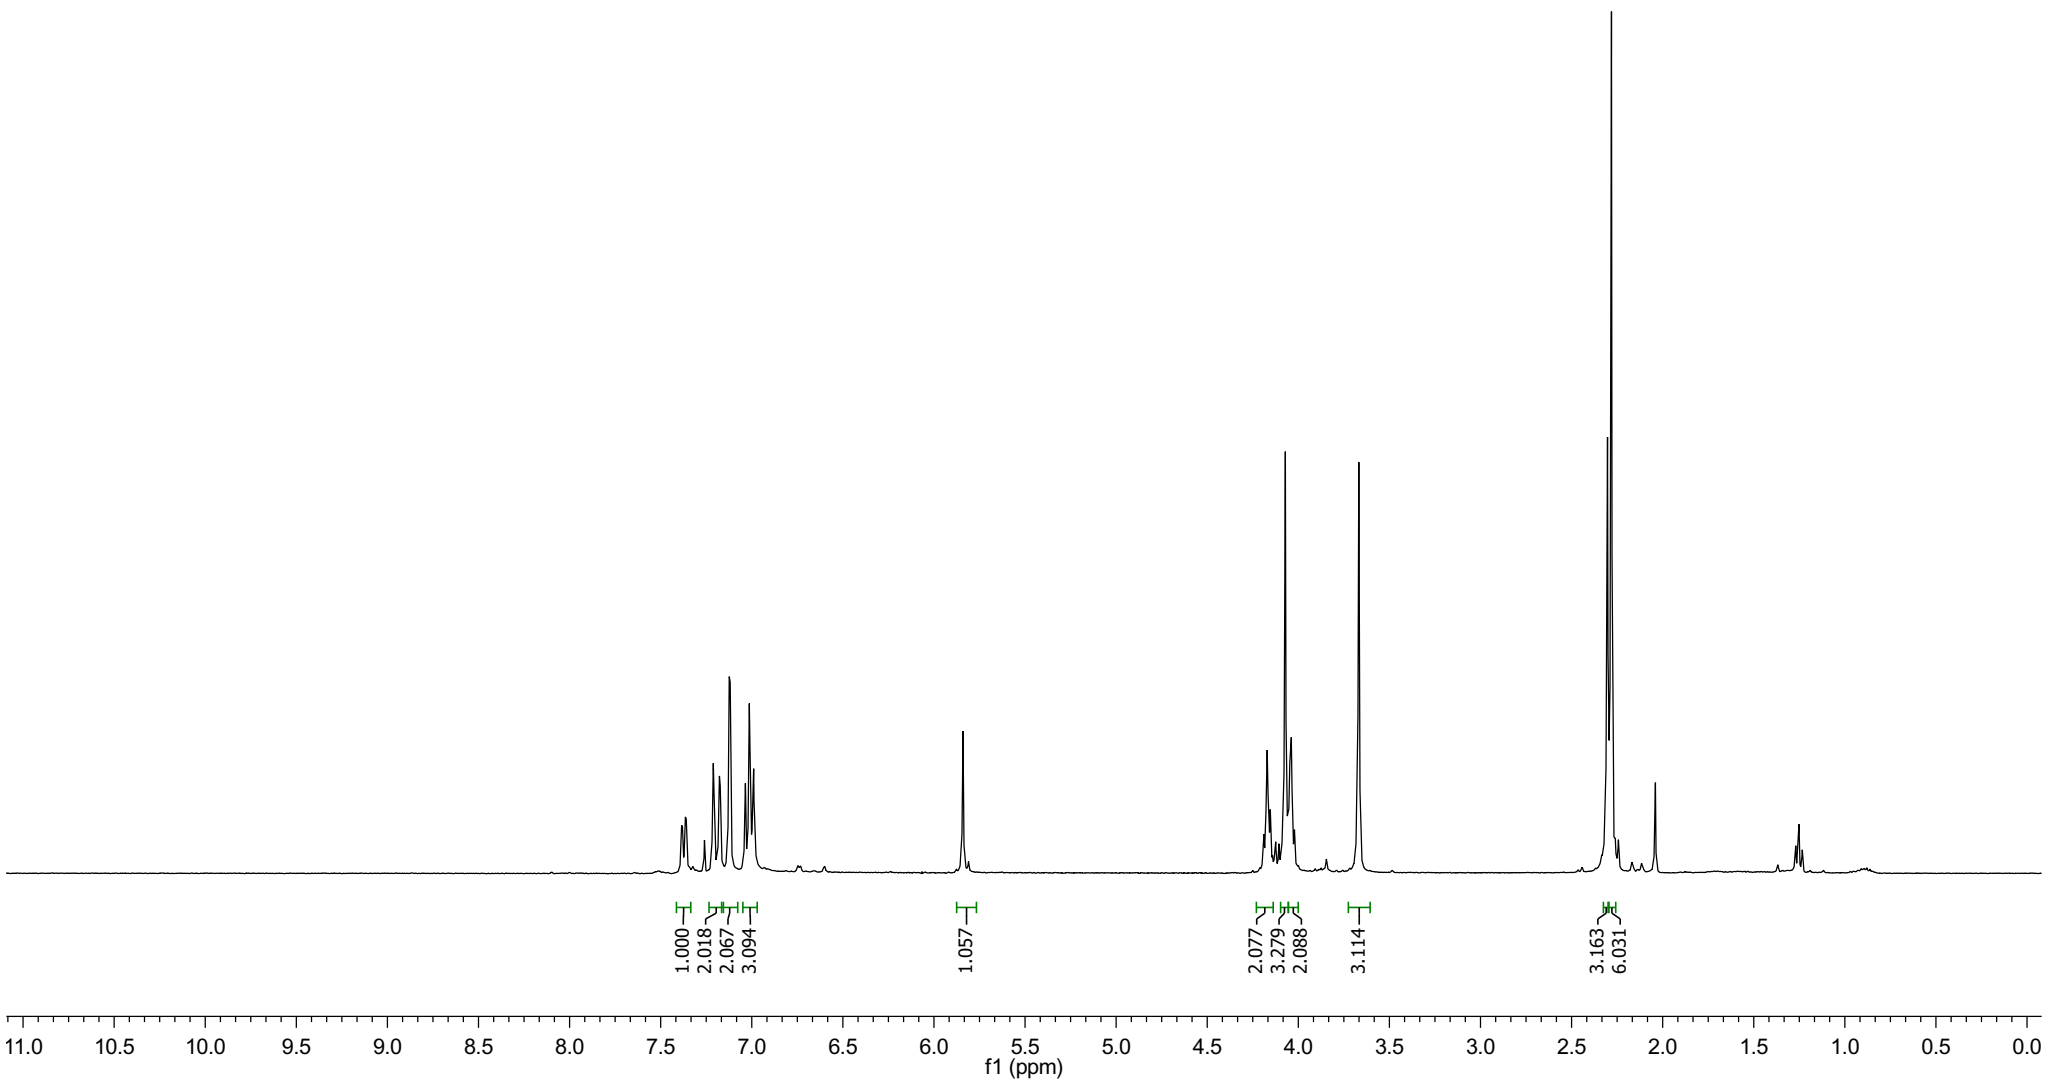

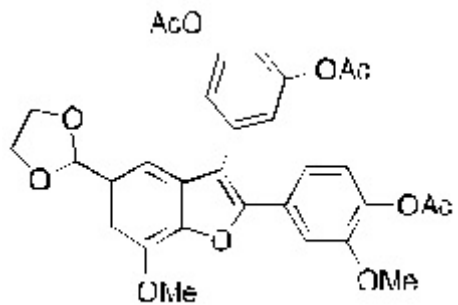

61

168.986  
168.943

151.698  
151.126

145.425  
143.776  
140.200

134.759  
134.134  
131.193  
128.615

123.186  
120.671  
119.706  
116.532  
115.364  
111.119  
109.936  
105.936  
104.185

77.549 CDCl<sub>3</sub>  
77.230 CDCl<sub>3</sub>  
76.913 CDCl<sub>3</sub>

65.498

56.345  
55.895

21.276  
20.871

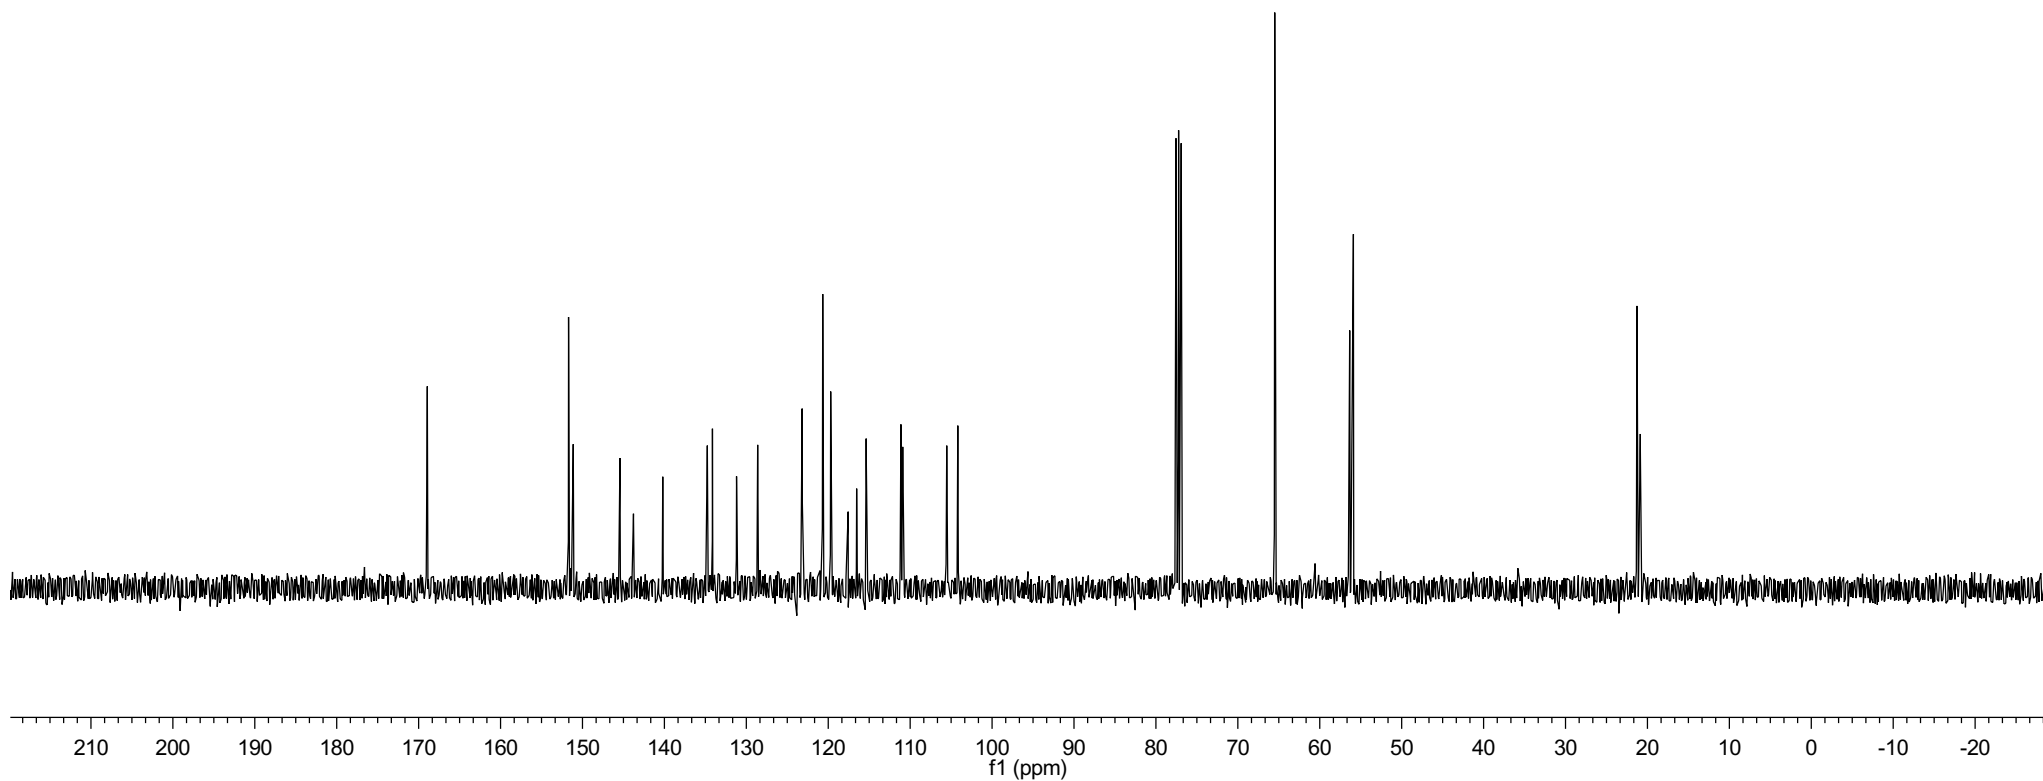

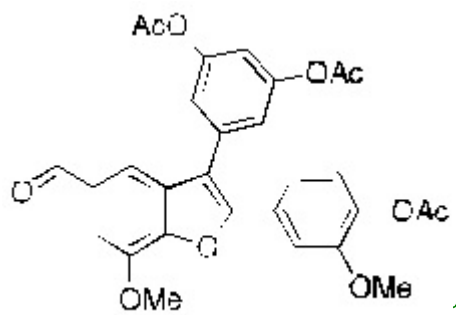

62

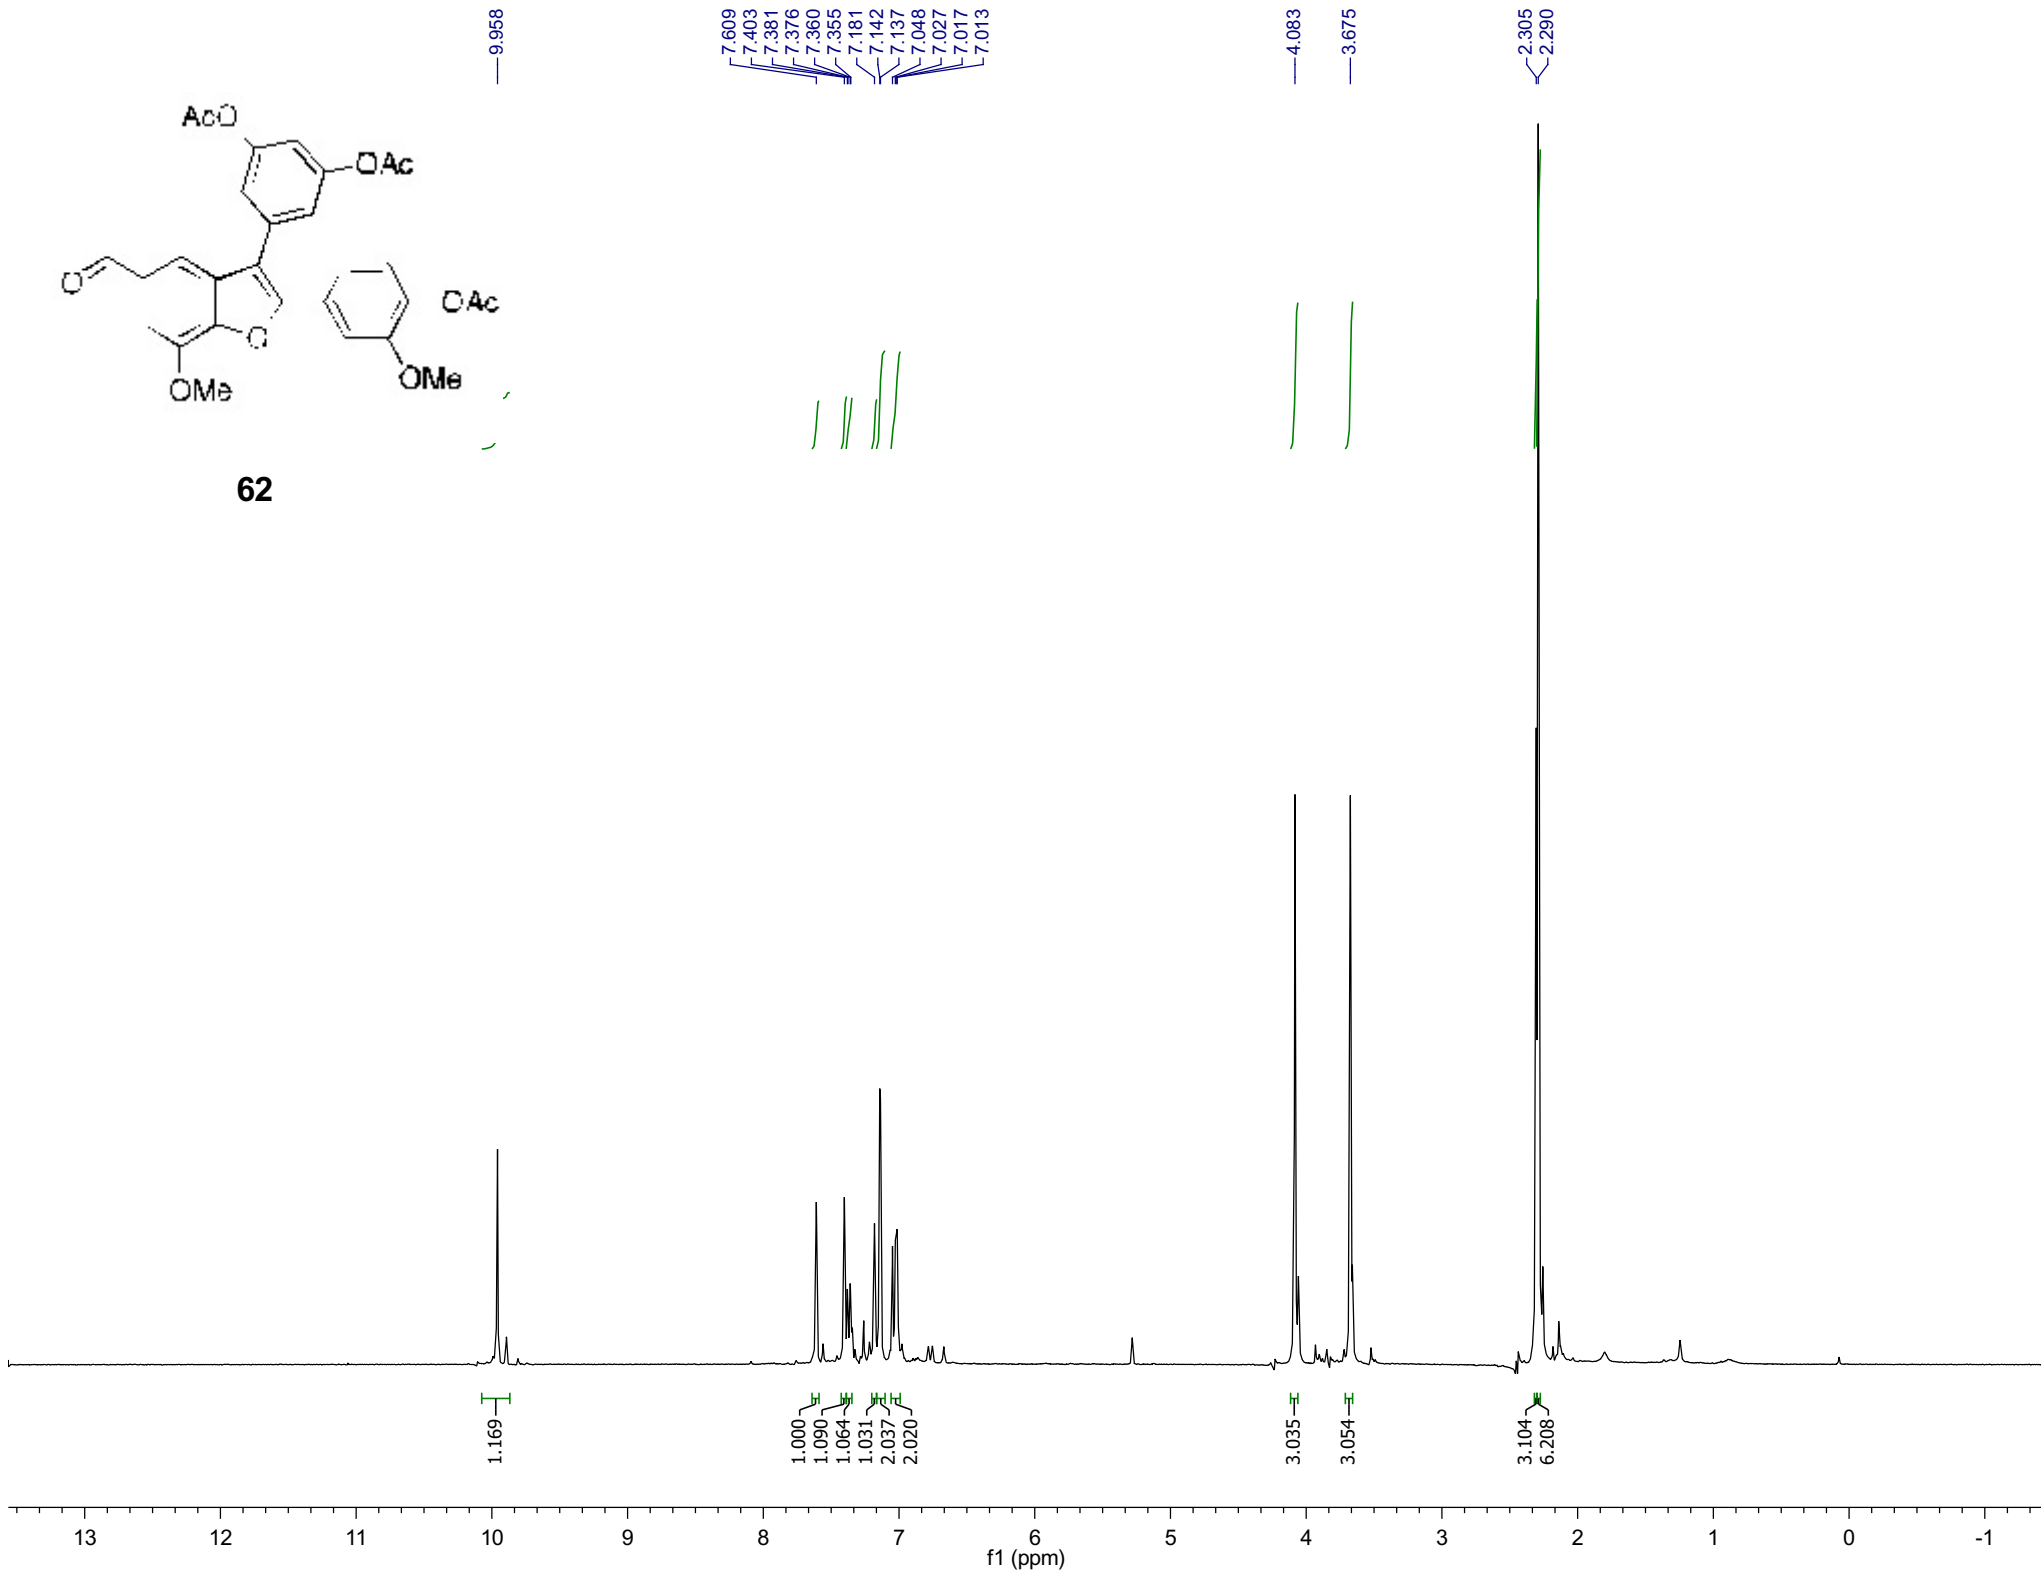

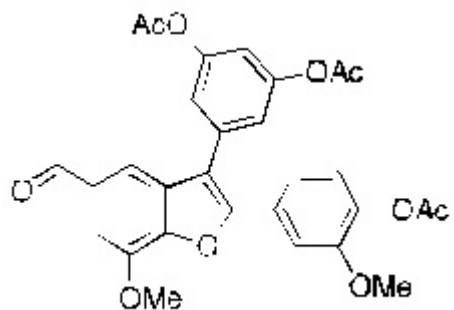

62

191.848  
191.839

168.965

152.150  
151.858  
151.267  
146.836  
146.220  
140.599

133.898  
133.846  
131.512  
127.979  
123.356  
120.564  
119.831  
118.527  
116.647  
115.684  
111.143

105.133

77.549 CDCl<sub>3</sub>  
77.231 CDCl<sub>3</sub>  
76.914 CDCl<sub>3</sub>

56.426  
55.928

21.281  
20.870

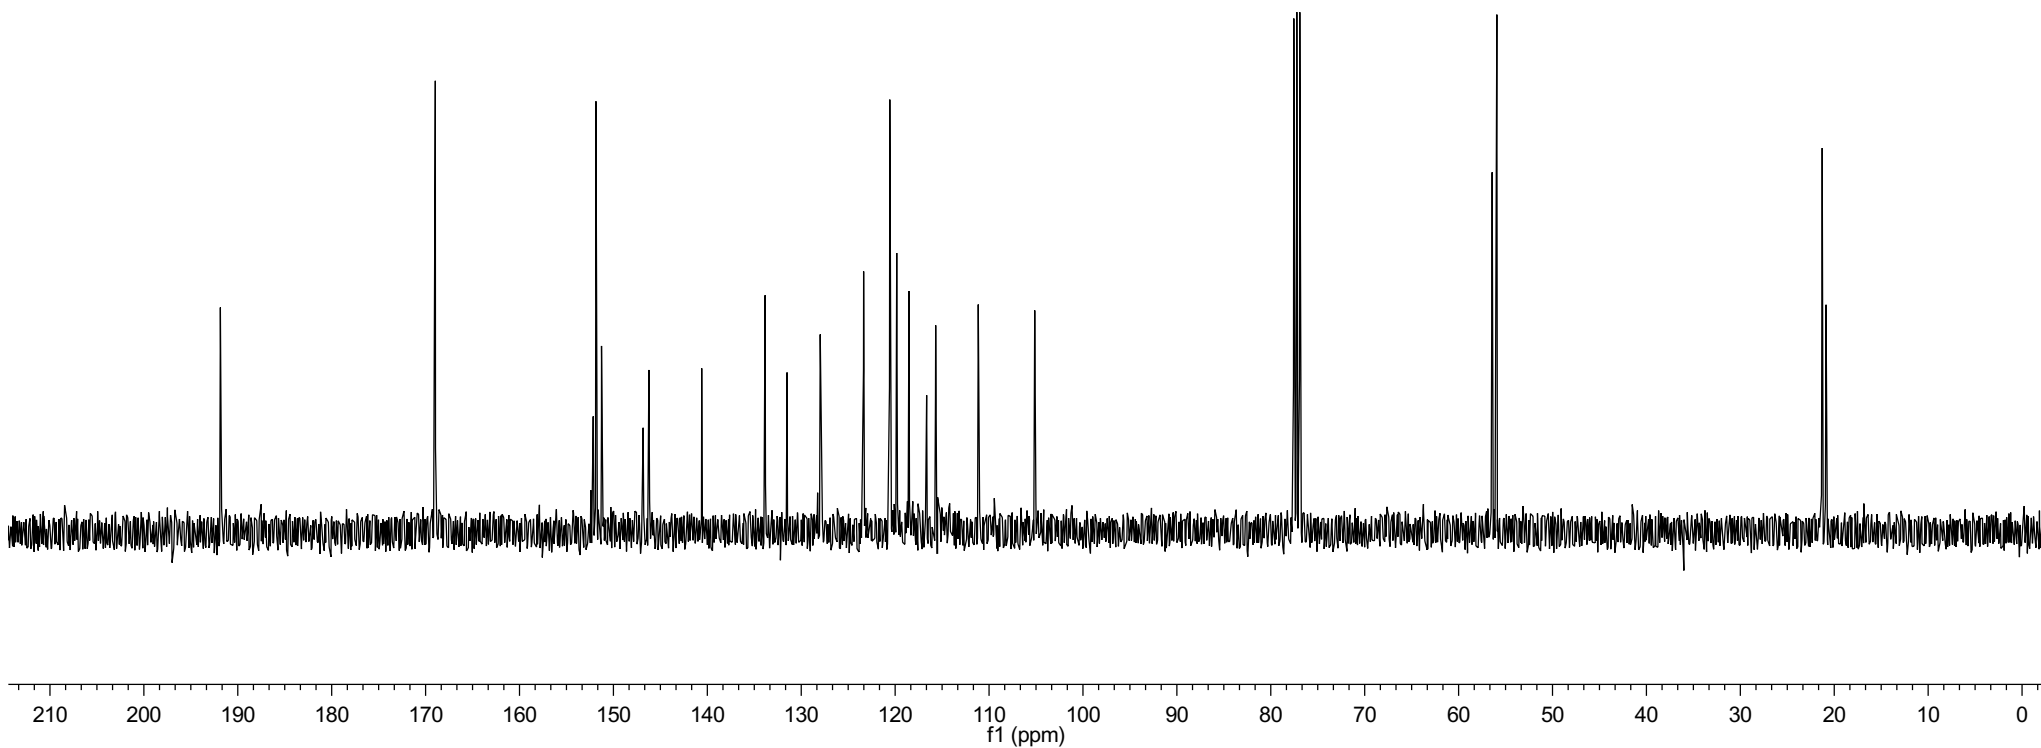

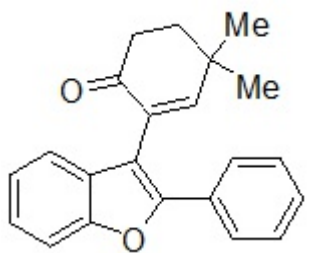

64

7.73  
7.72  
7.53  
7.51  
7.42  
7.40  
7.38  
7.35  
7.33  
7.30  
7.28  
7.26  
7.25  
7.23  
7.21  
6.82

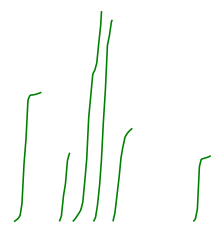

2.74  
2.73  
2.71  
2.10  
2.08  
2.06  
1.27

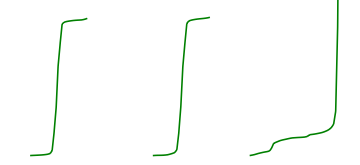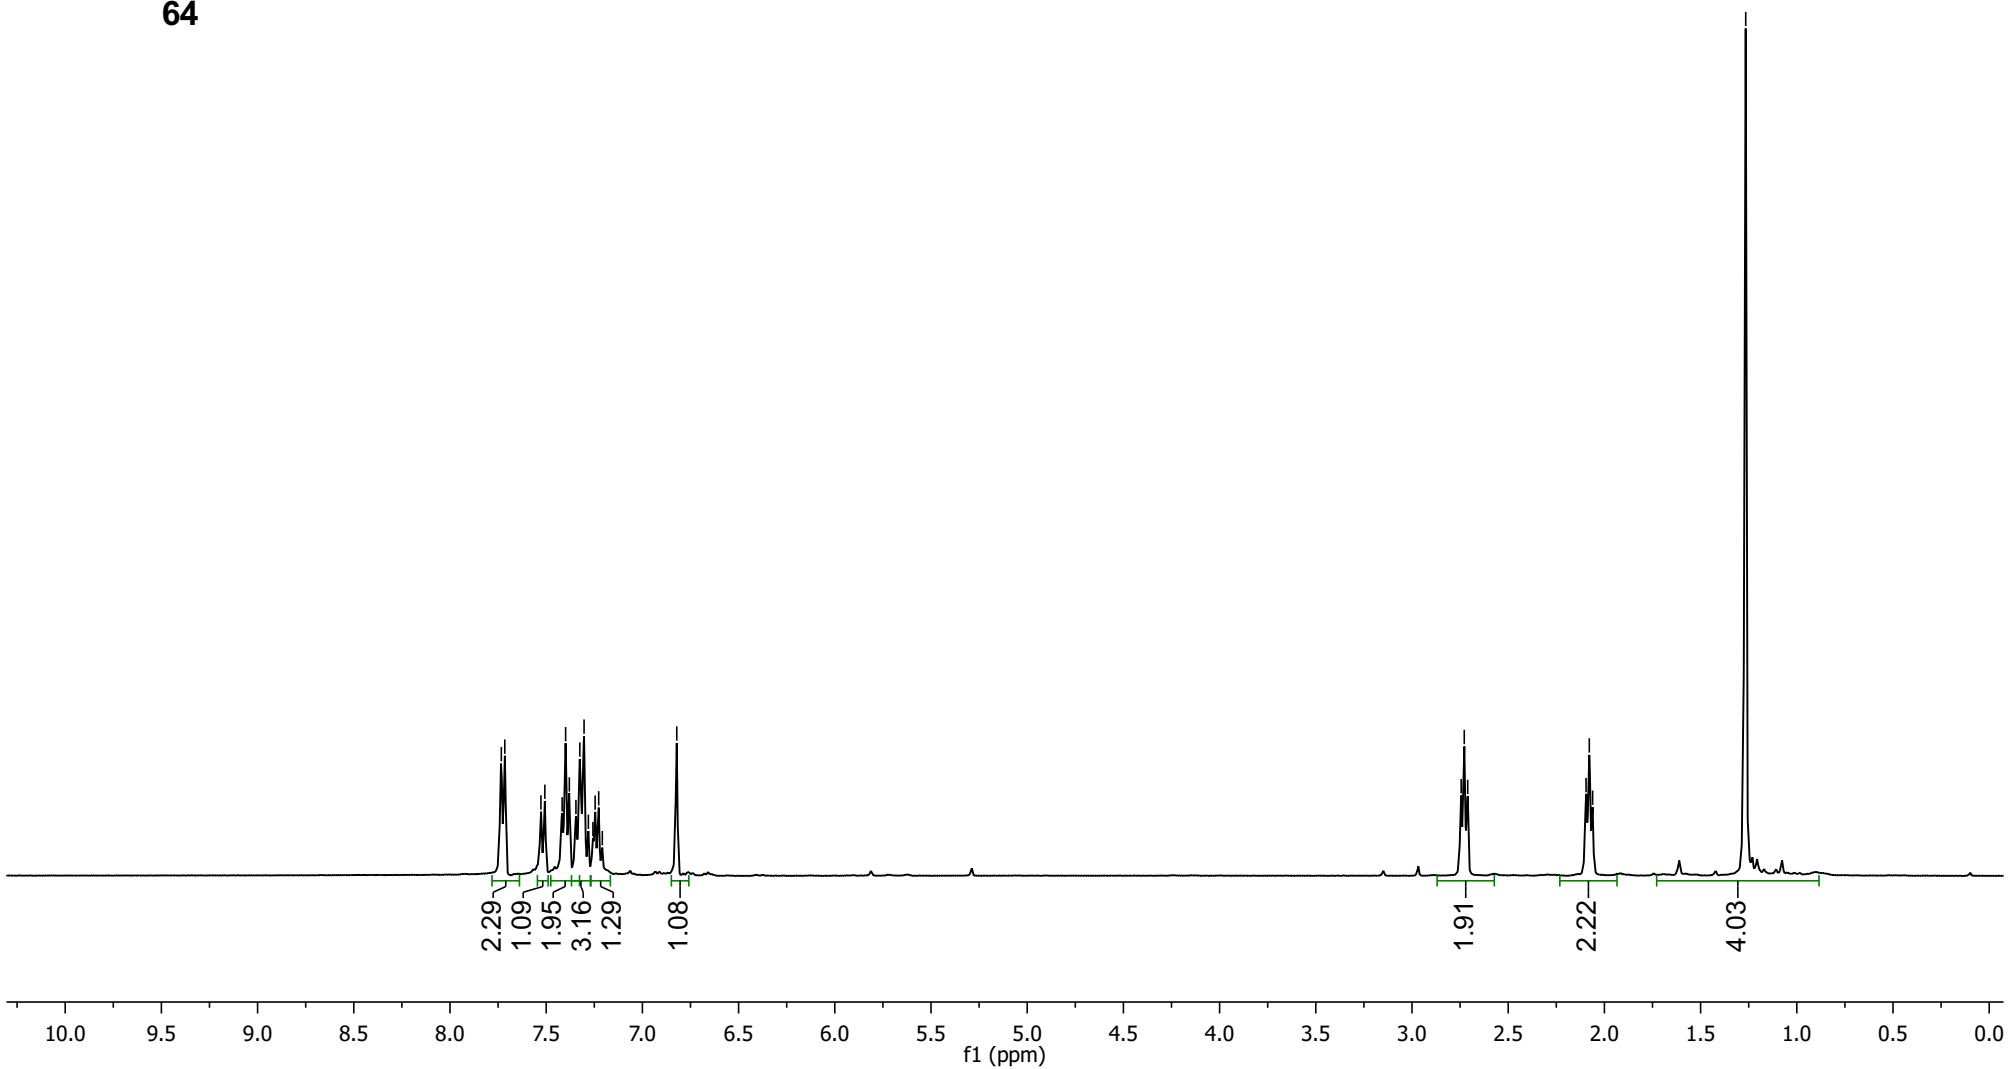

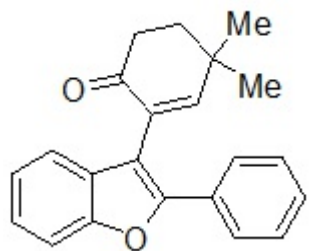

64

—197.21

—160.74

—154.03

—151.95

130.91

130.26

130.17

128.56

127.04

124.70

122.94

120.14

115.48

112.48

111.31

77.55 CDCl<sub>3</sub>

77.23 CDCl<sub>3</sub>

76.91 CDCl<sub>3</sub>

36.33

35.32

33.90

—27.82

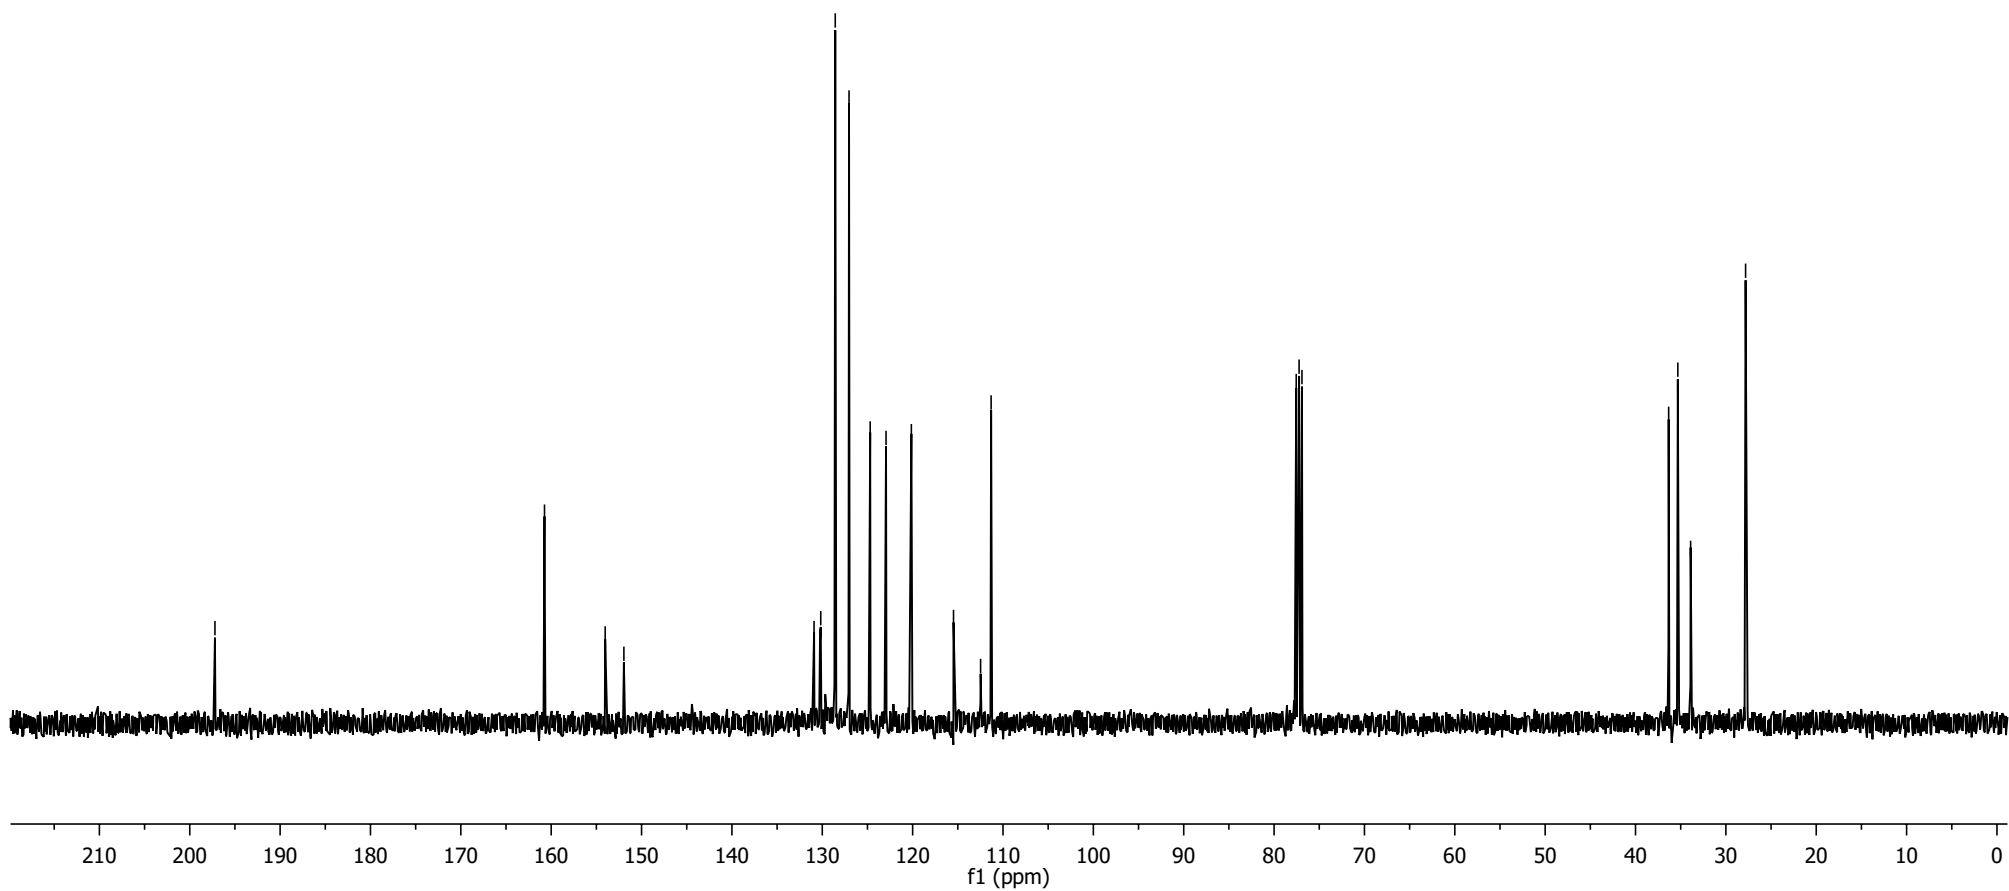



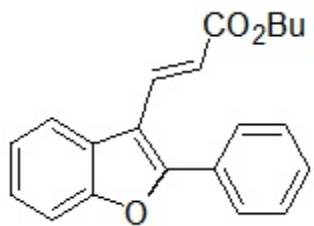

67

8.07  
8.03  
7.91  
7.89  
7.79  
7.77  
7.57  
7.56  
7.54  
7.52  
7.50  
7.49  
7.41  
7.39  
7.37  
7.35  
7.34  
6.71  
6.67

4.27  
4.26  
4.24

1.76  
1.74  
1.73  
1.71  
1.69  
1.52  
1.51  
1.49  
1.47  
1.45  
1.43  
1.02  
1.00  
0.98

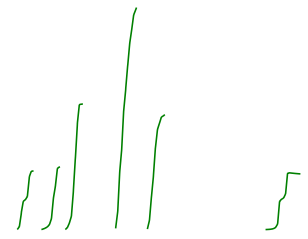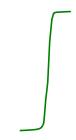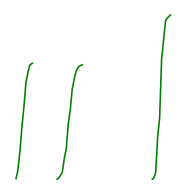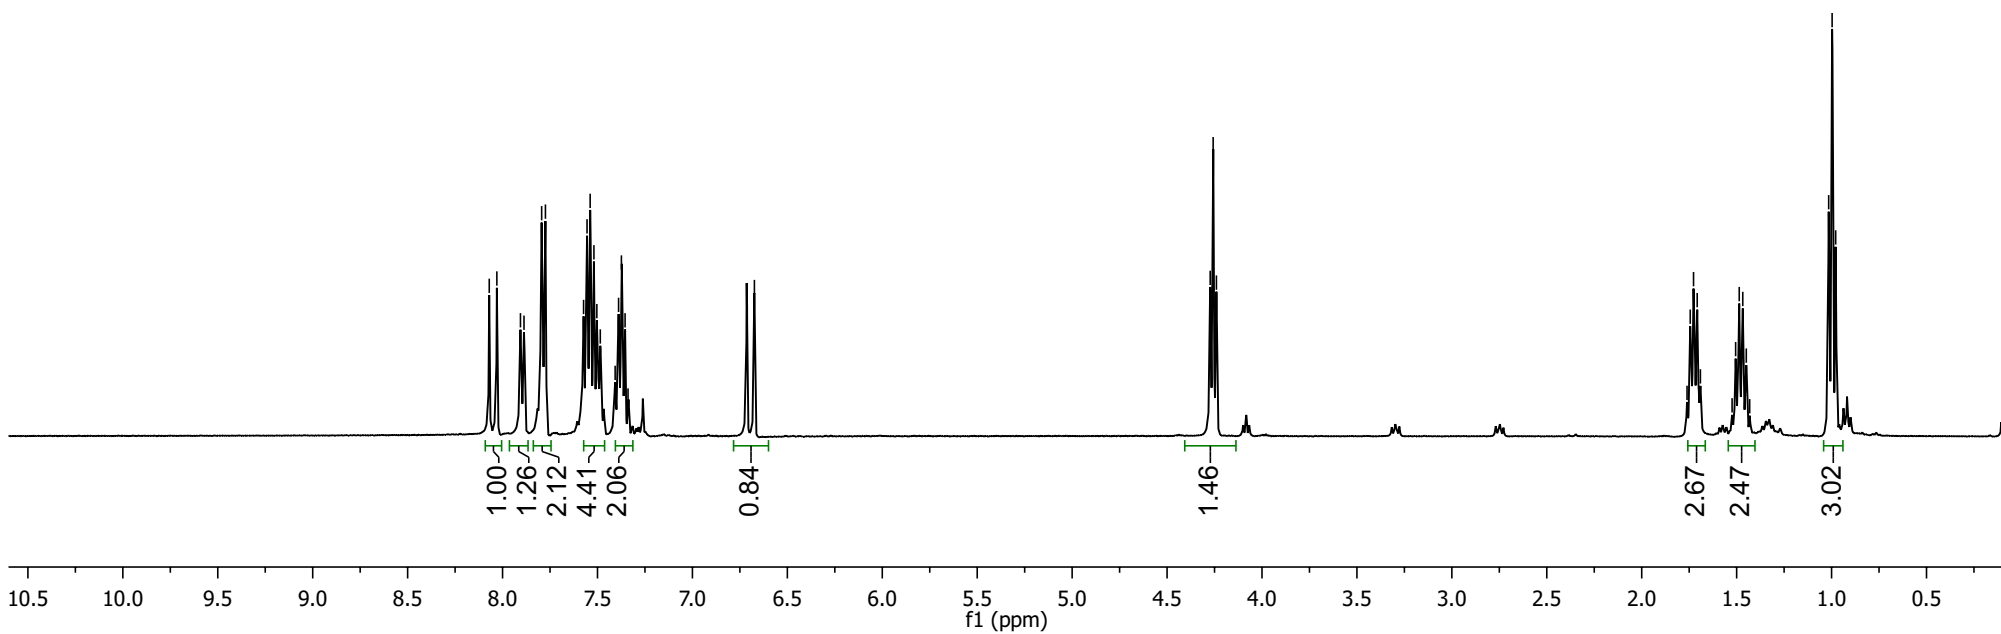

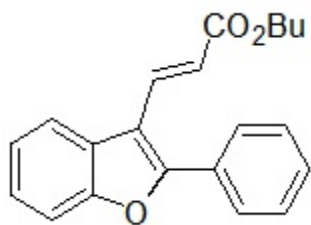

67

—167.56  
—157.70  
—154.65

—136.04  
—129.88  
—129.08  
—128.72  
—126.92  
—125.47  
—123.92  
—121.20  
—119.39  
—115.48  
—112.84  
—111.76

—77.55 CDCl<sub>3</sub>  
—77.23 CDCl<sub>3</sub>  
—76.91 CDCl<sub>3</sub>

—64.62

—31.00

—19.46

—14.00

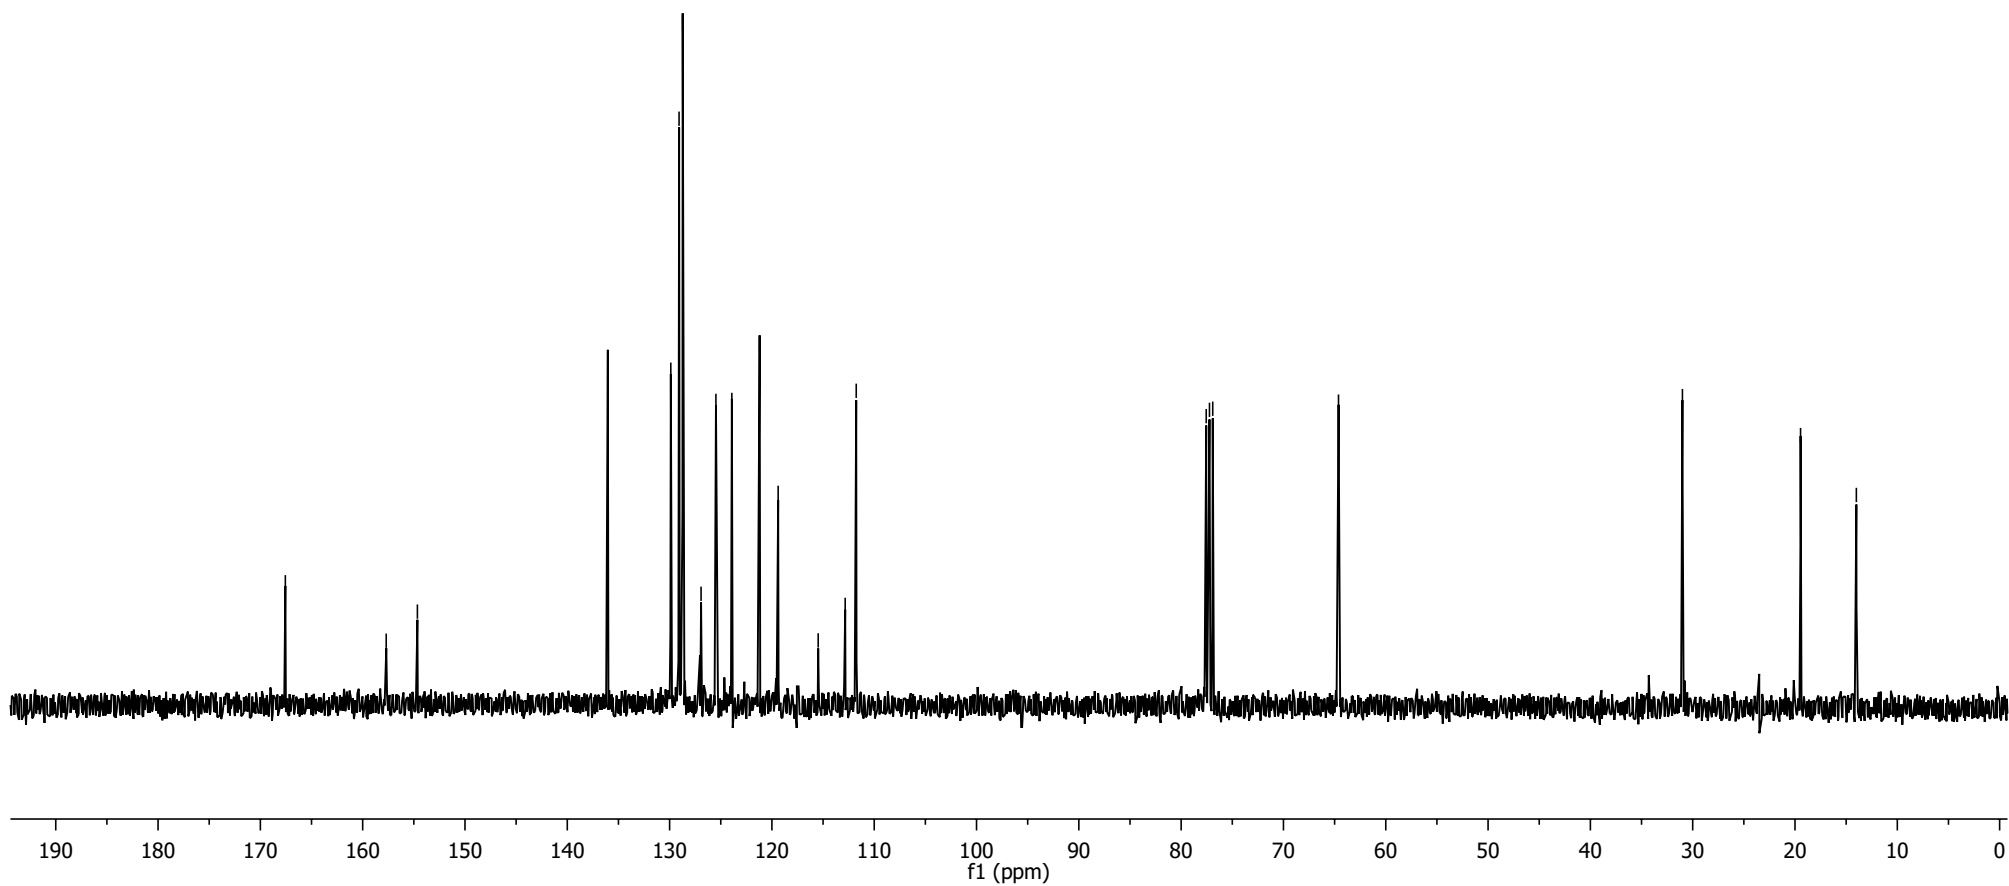

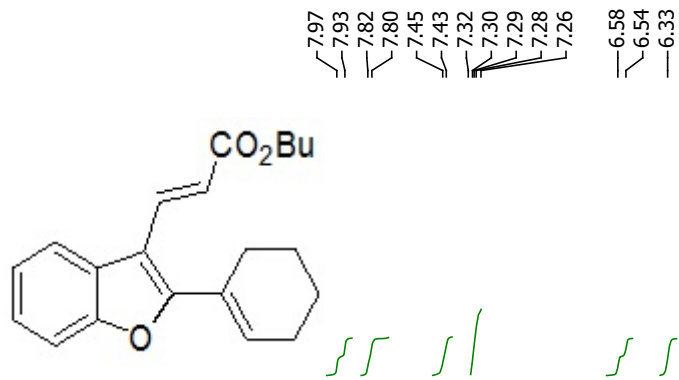

68

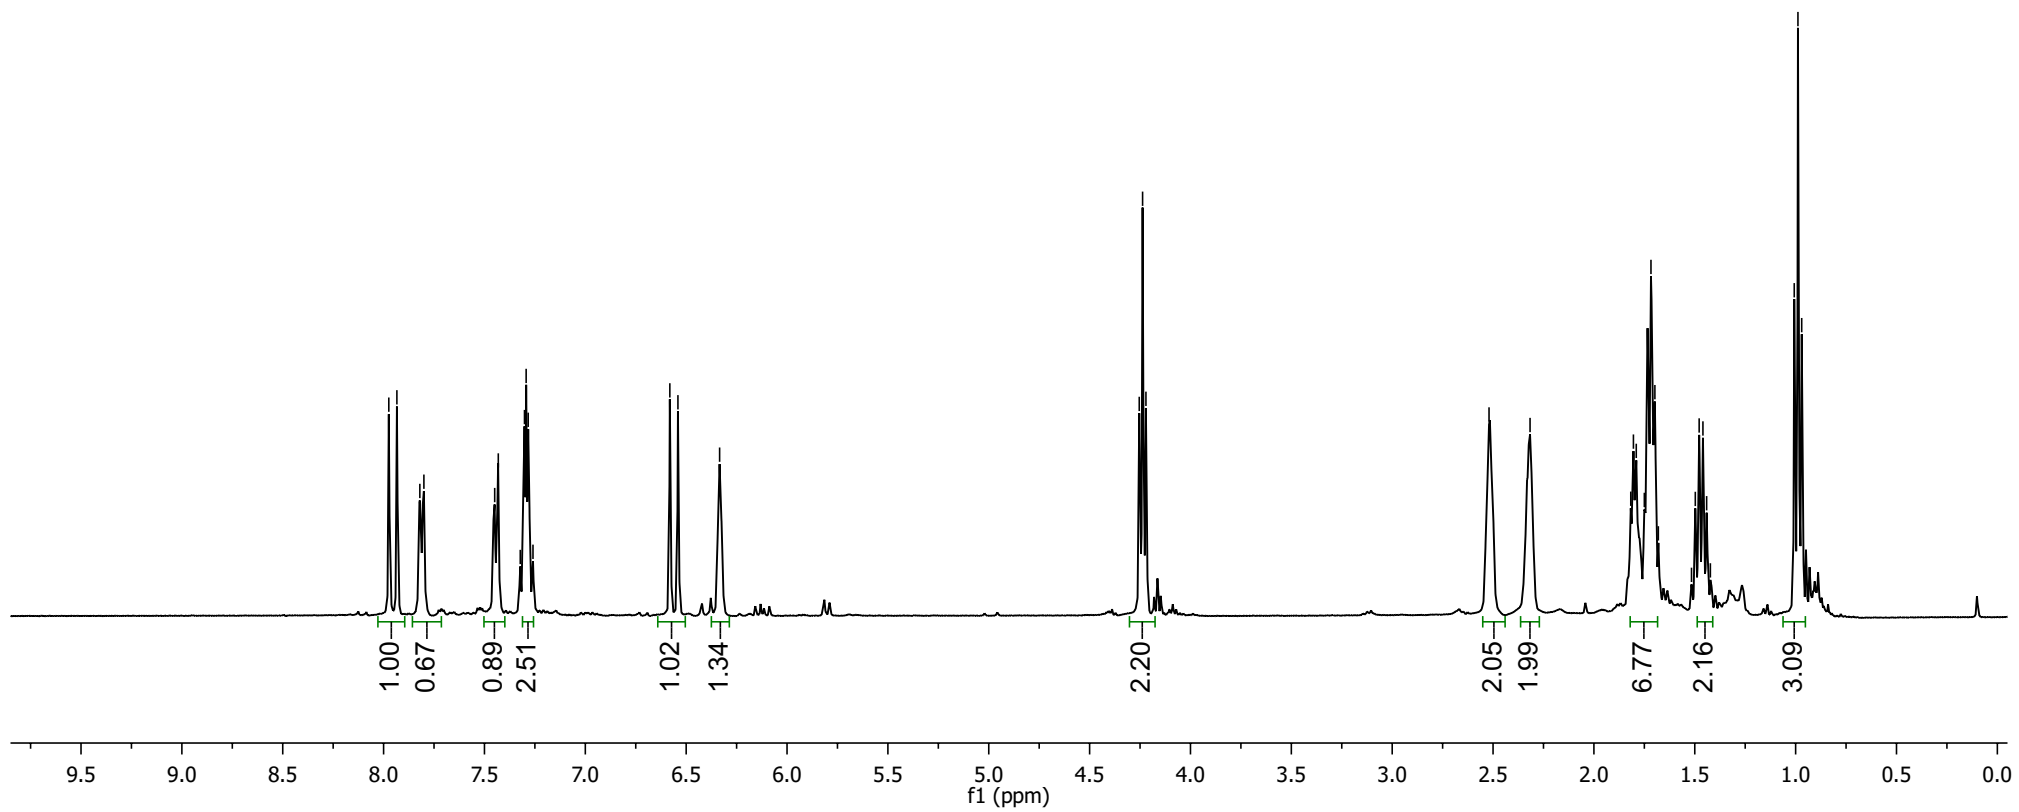

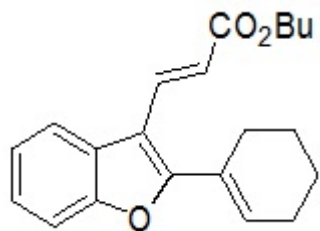

68

—167.86

—160.55

—153.96

—136.69

—134.90

—128.38

—126.75

—124.93

—123.55

—120.91

—117.56

—111.75

—111.39

77.55 CDCl<sub>3</sub>

77.23 CDCl<sub>3</sub>

76.91 CDCl<sub>3</sub>

—64.42

—31.02

—26.60

—26.21

—22.48

—21.90

—19.44

—13.96

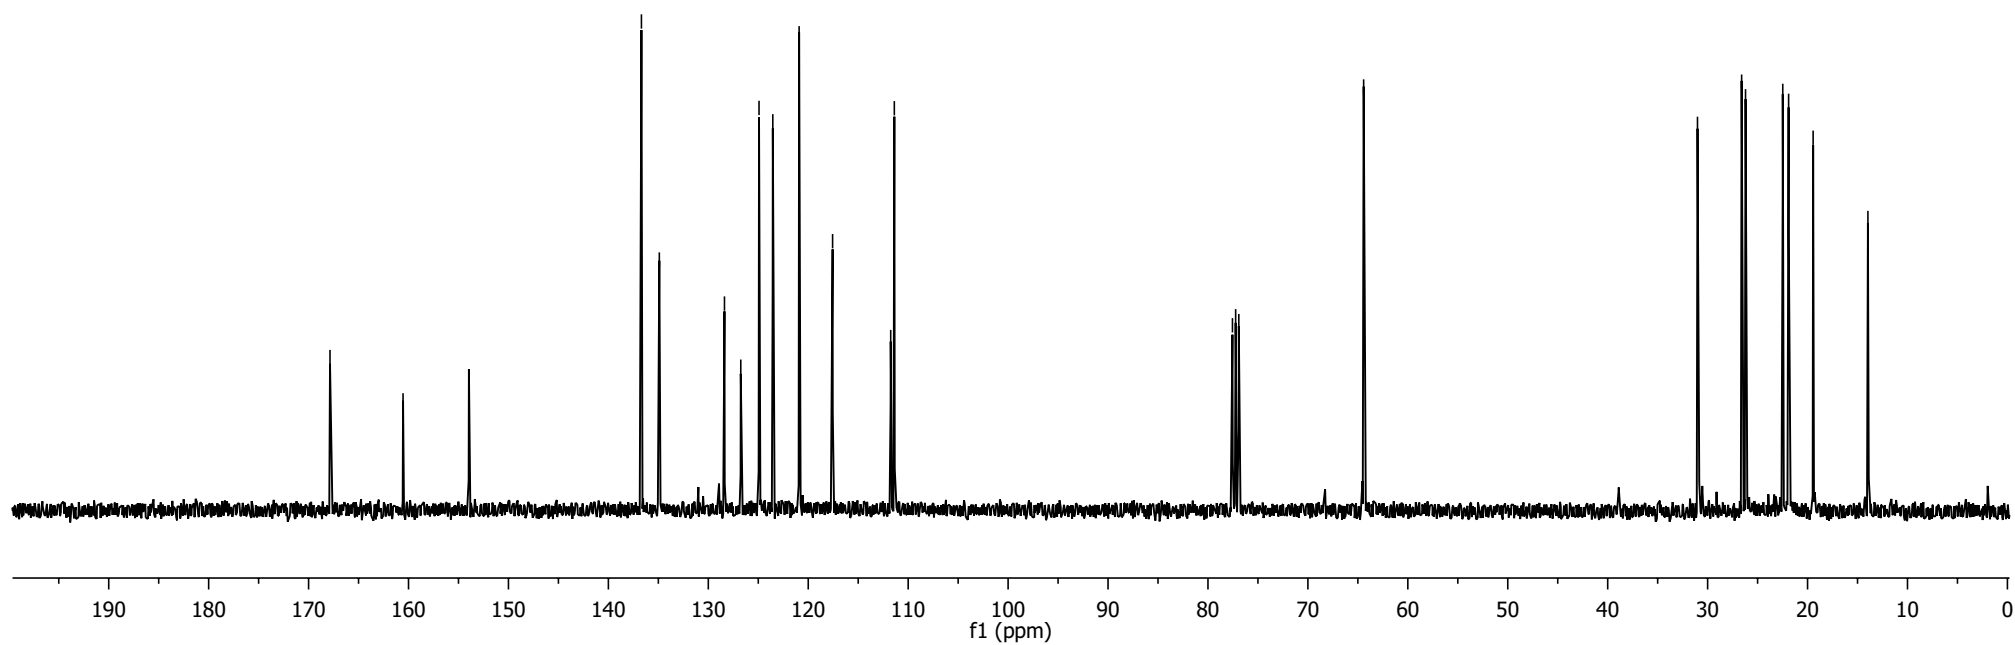

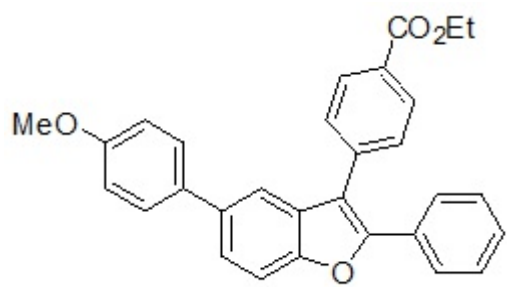

69

8.18  
8.16  
7.64  
7.61  
7.53  
7.51  
7.34  
7.33  
6.98  
6.96

4.46  
4.45  
4.43  
4.41  
3.85  
3.85

1.46  
1.44  
1.44  
1.42

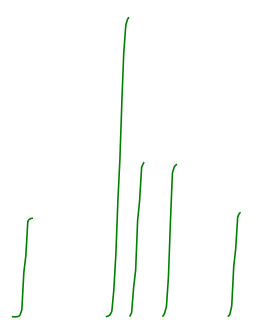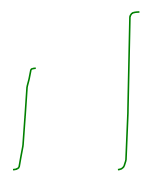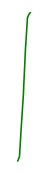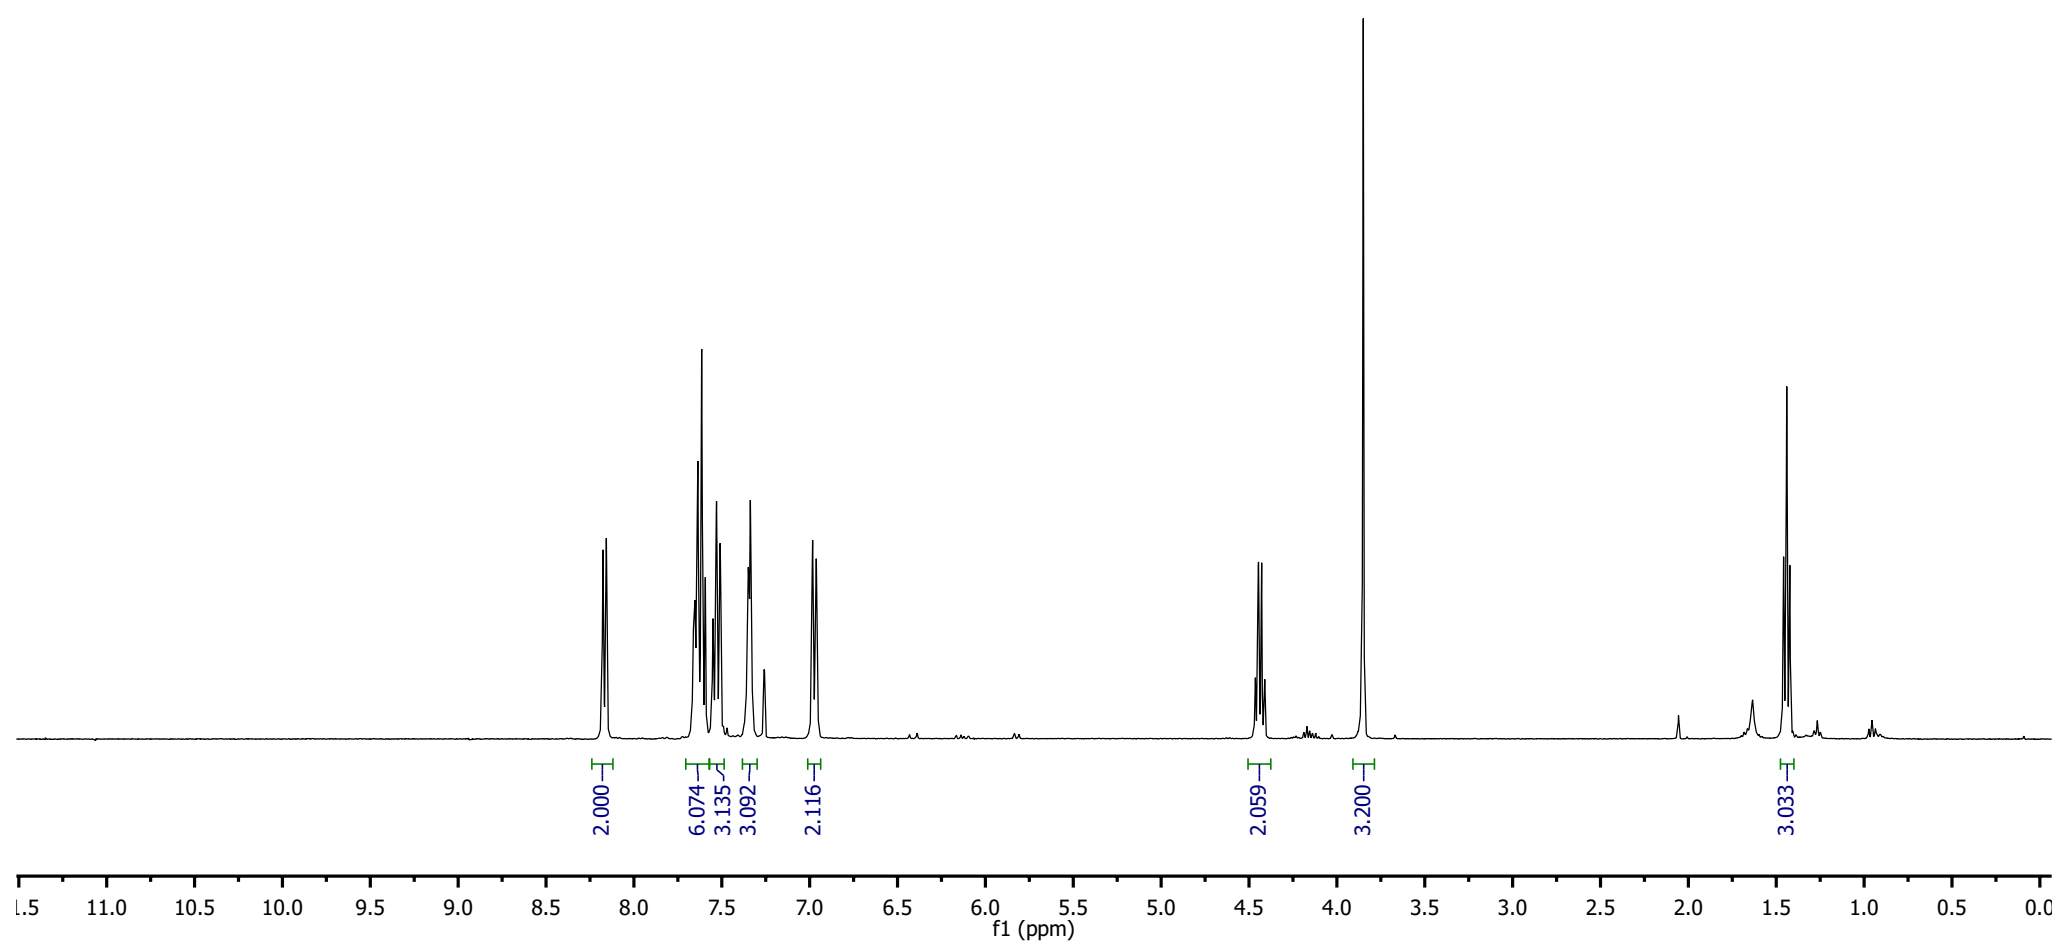

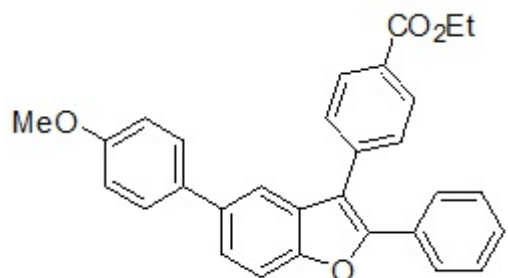

69

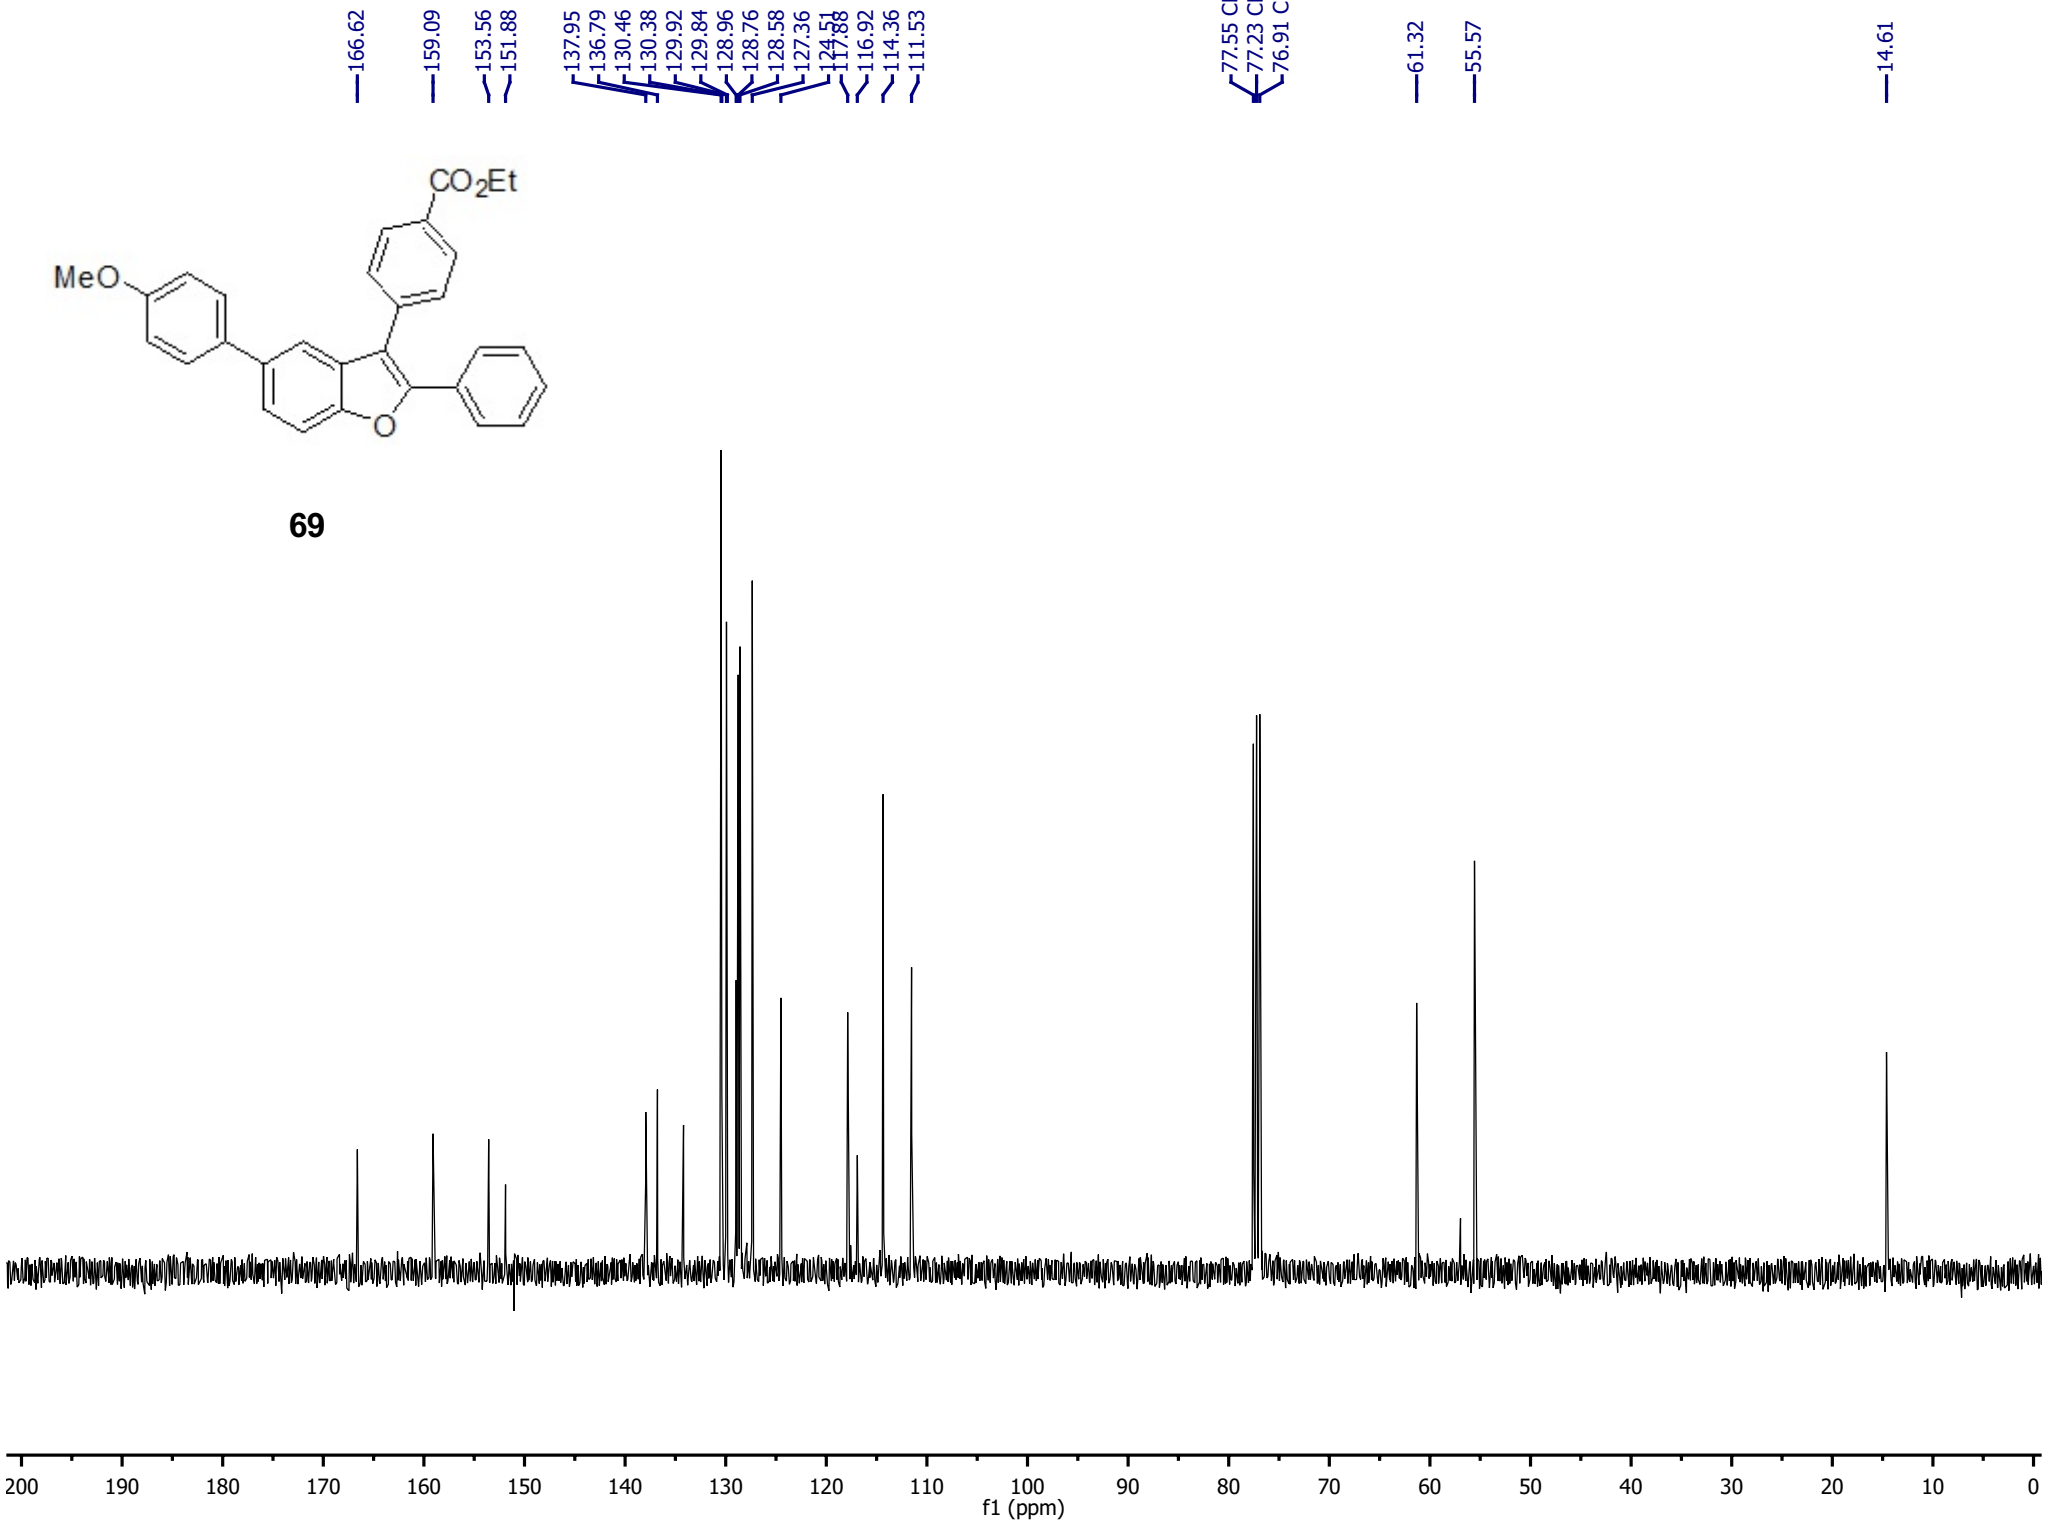

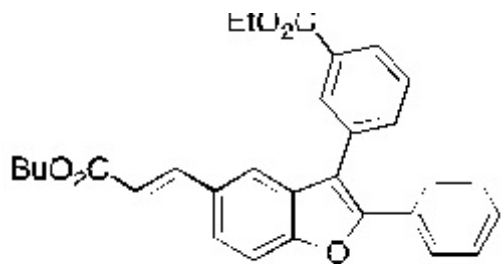

70

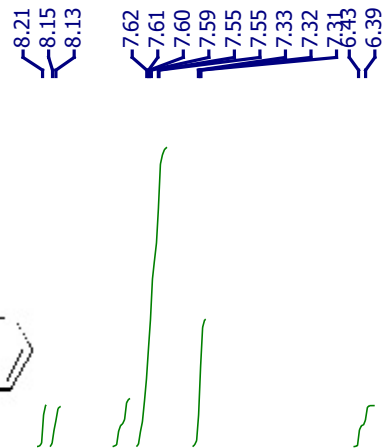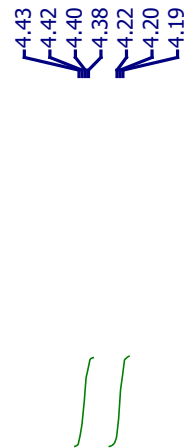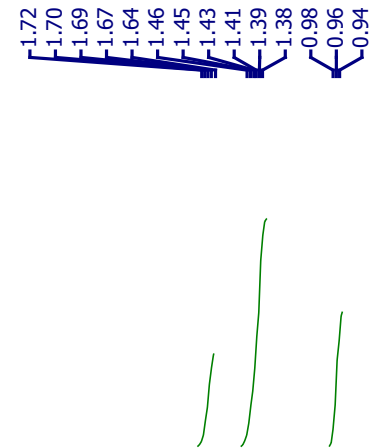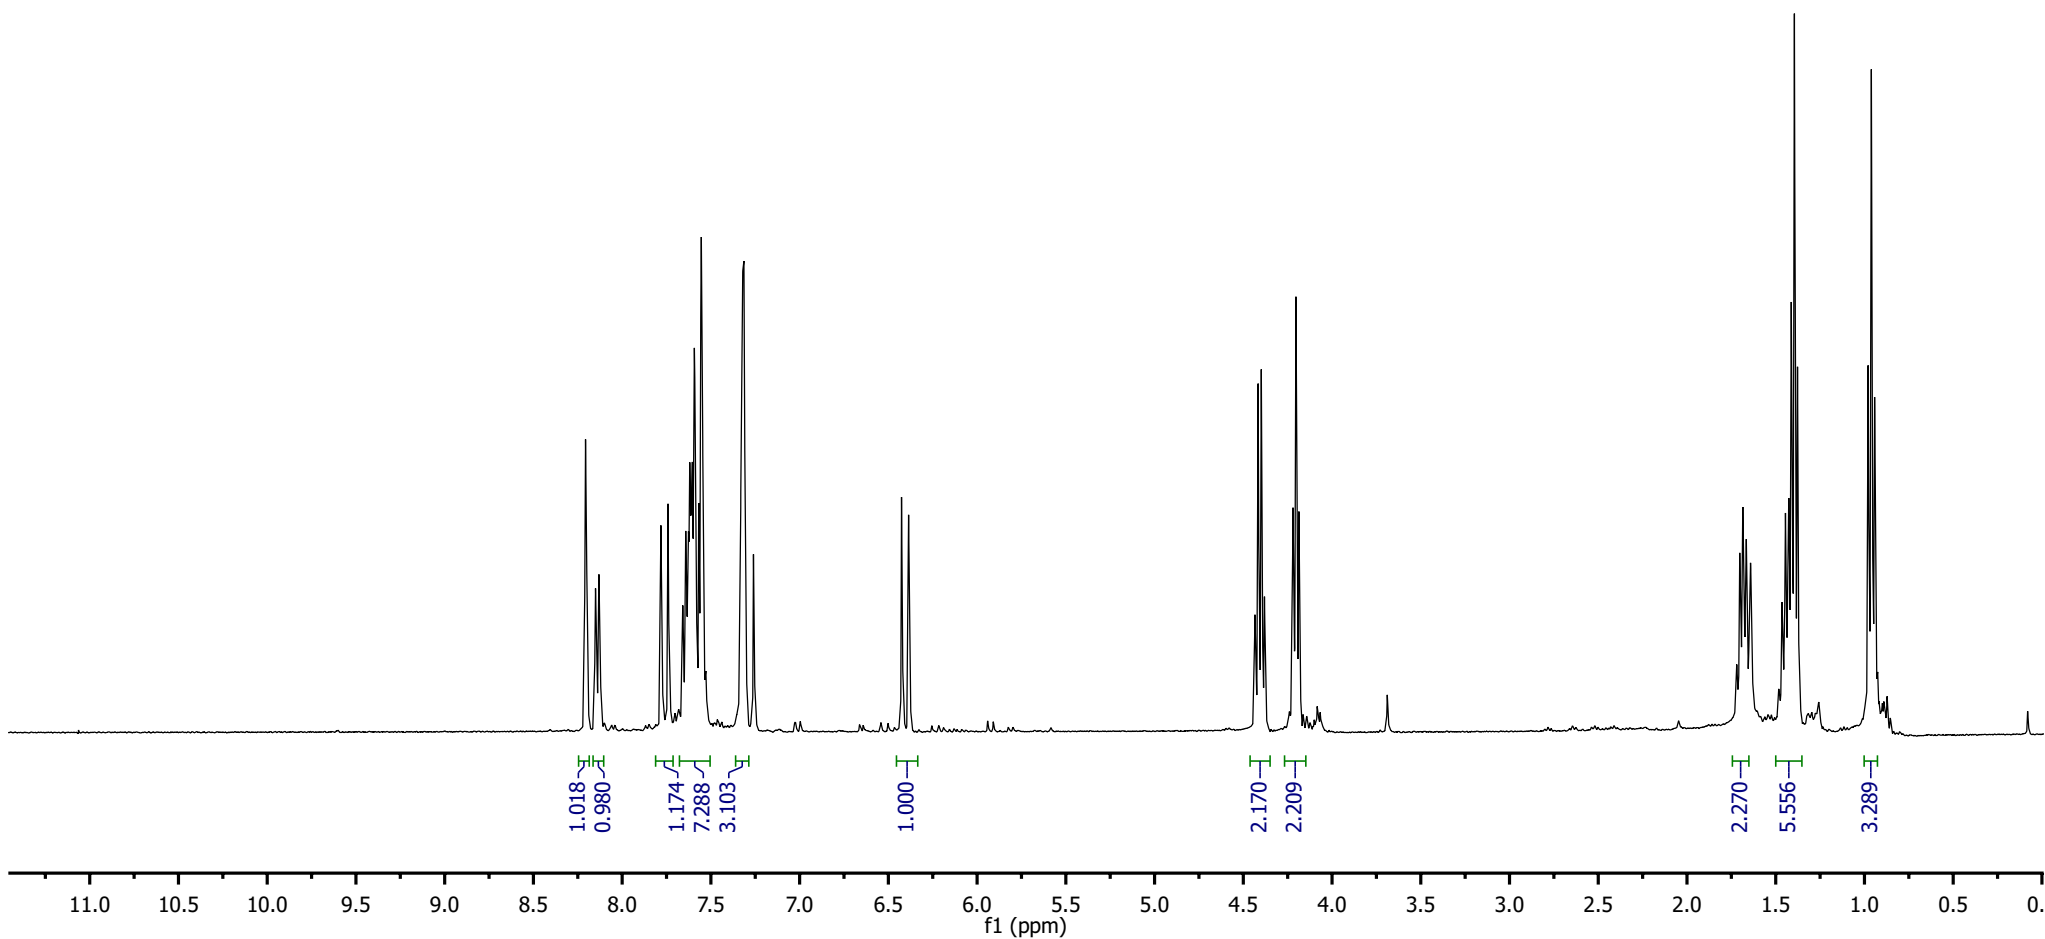

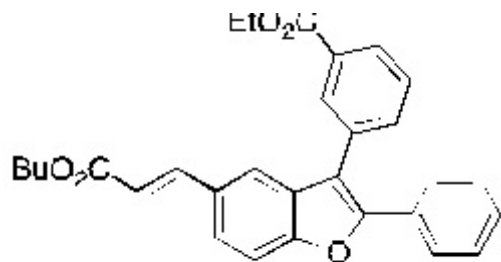

70

167.36  
166.44  
155.22  
152.24  
144.98  
134.38  
132.89  
131.78  
130.91  
130.16  
130.07  
129.48  
129.32  
129.09  
128.79  
127.17  
125.19  
120.08  
117.42  
116.74  
111.89

77.55 CDCl3  
77.23 CDCl3  
76.91 CDCl3

64.57  
61.41

31.01

19.43  
14.54  
13.98

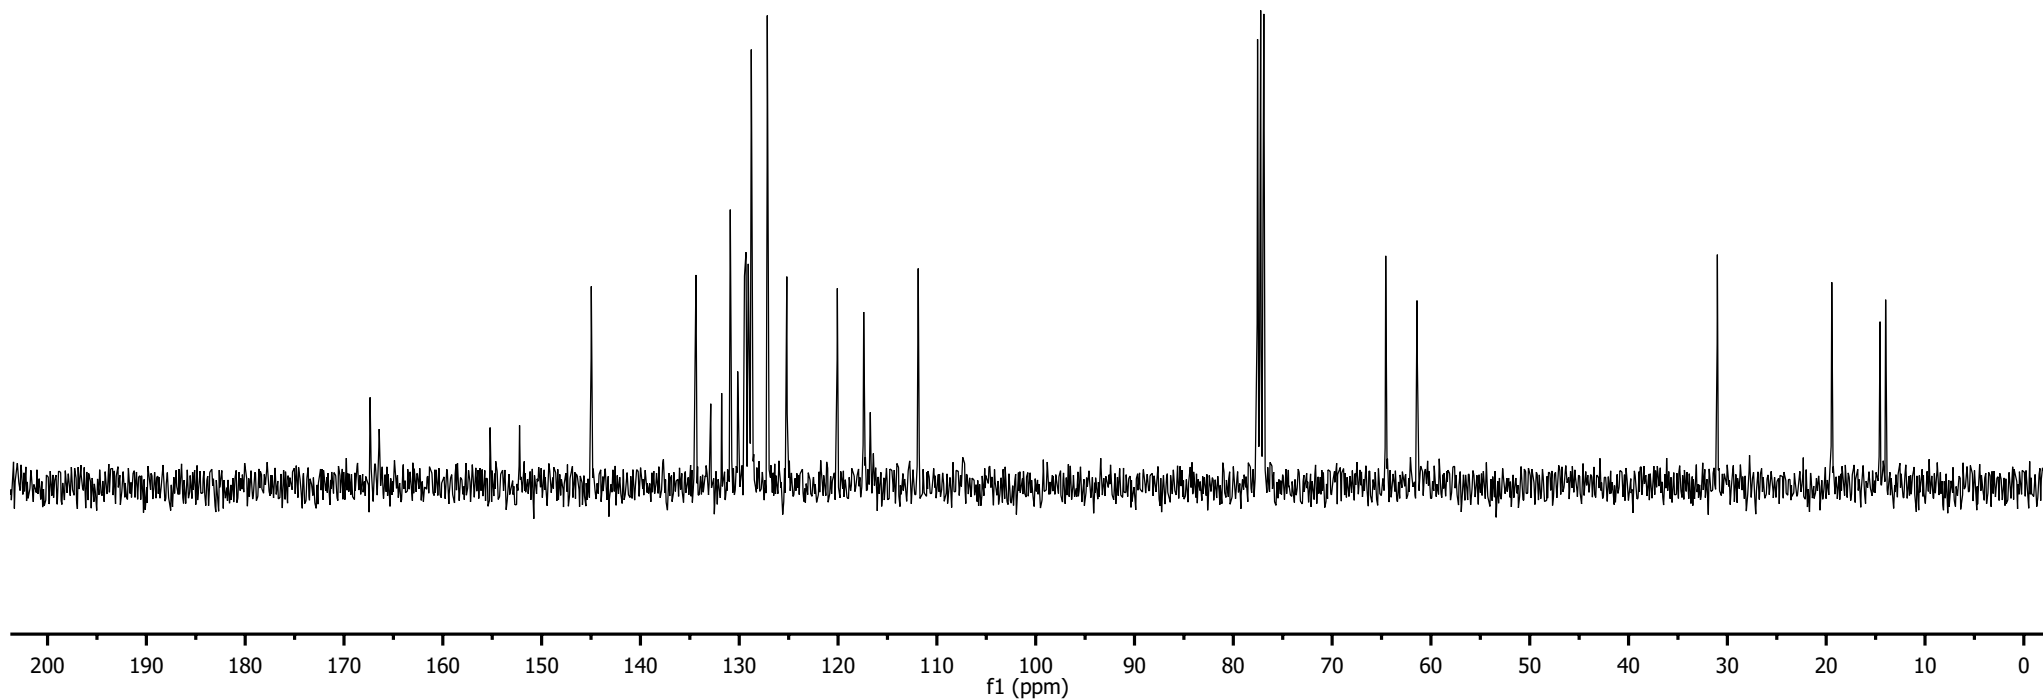



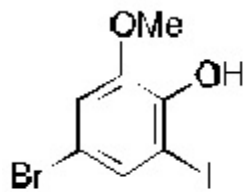

56

7.429  
7.422

6.947  
6.940

6.040

3.883

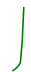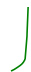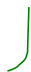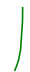

1.000

1.131

1.073

3.342

10.5 10.0 9.5 9.0 8.5 8.0 7.5 7.0 6.5 6.0 5.5 5.0 4.5 4.0 3.5 3.0 2.5 2.0 1.5 1.0 0.5

f1 (ppm)

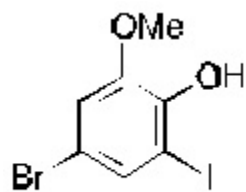

56

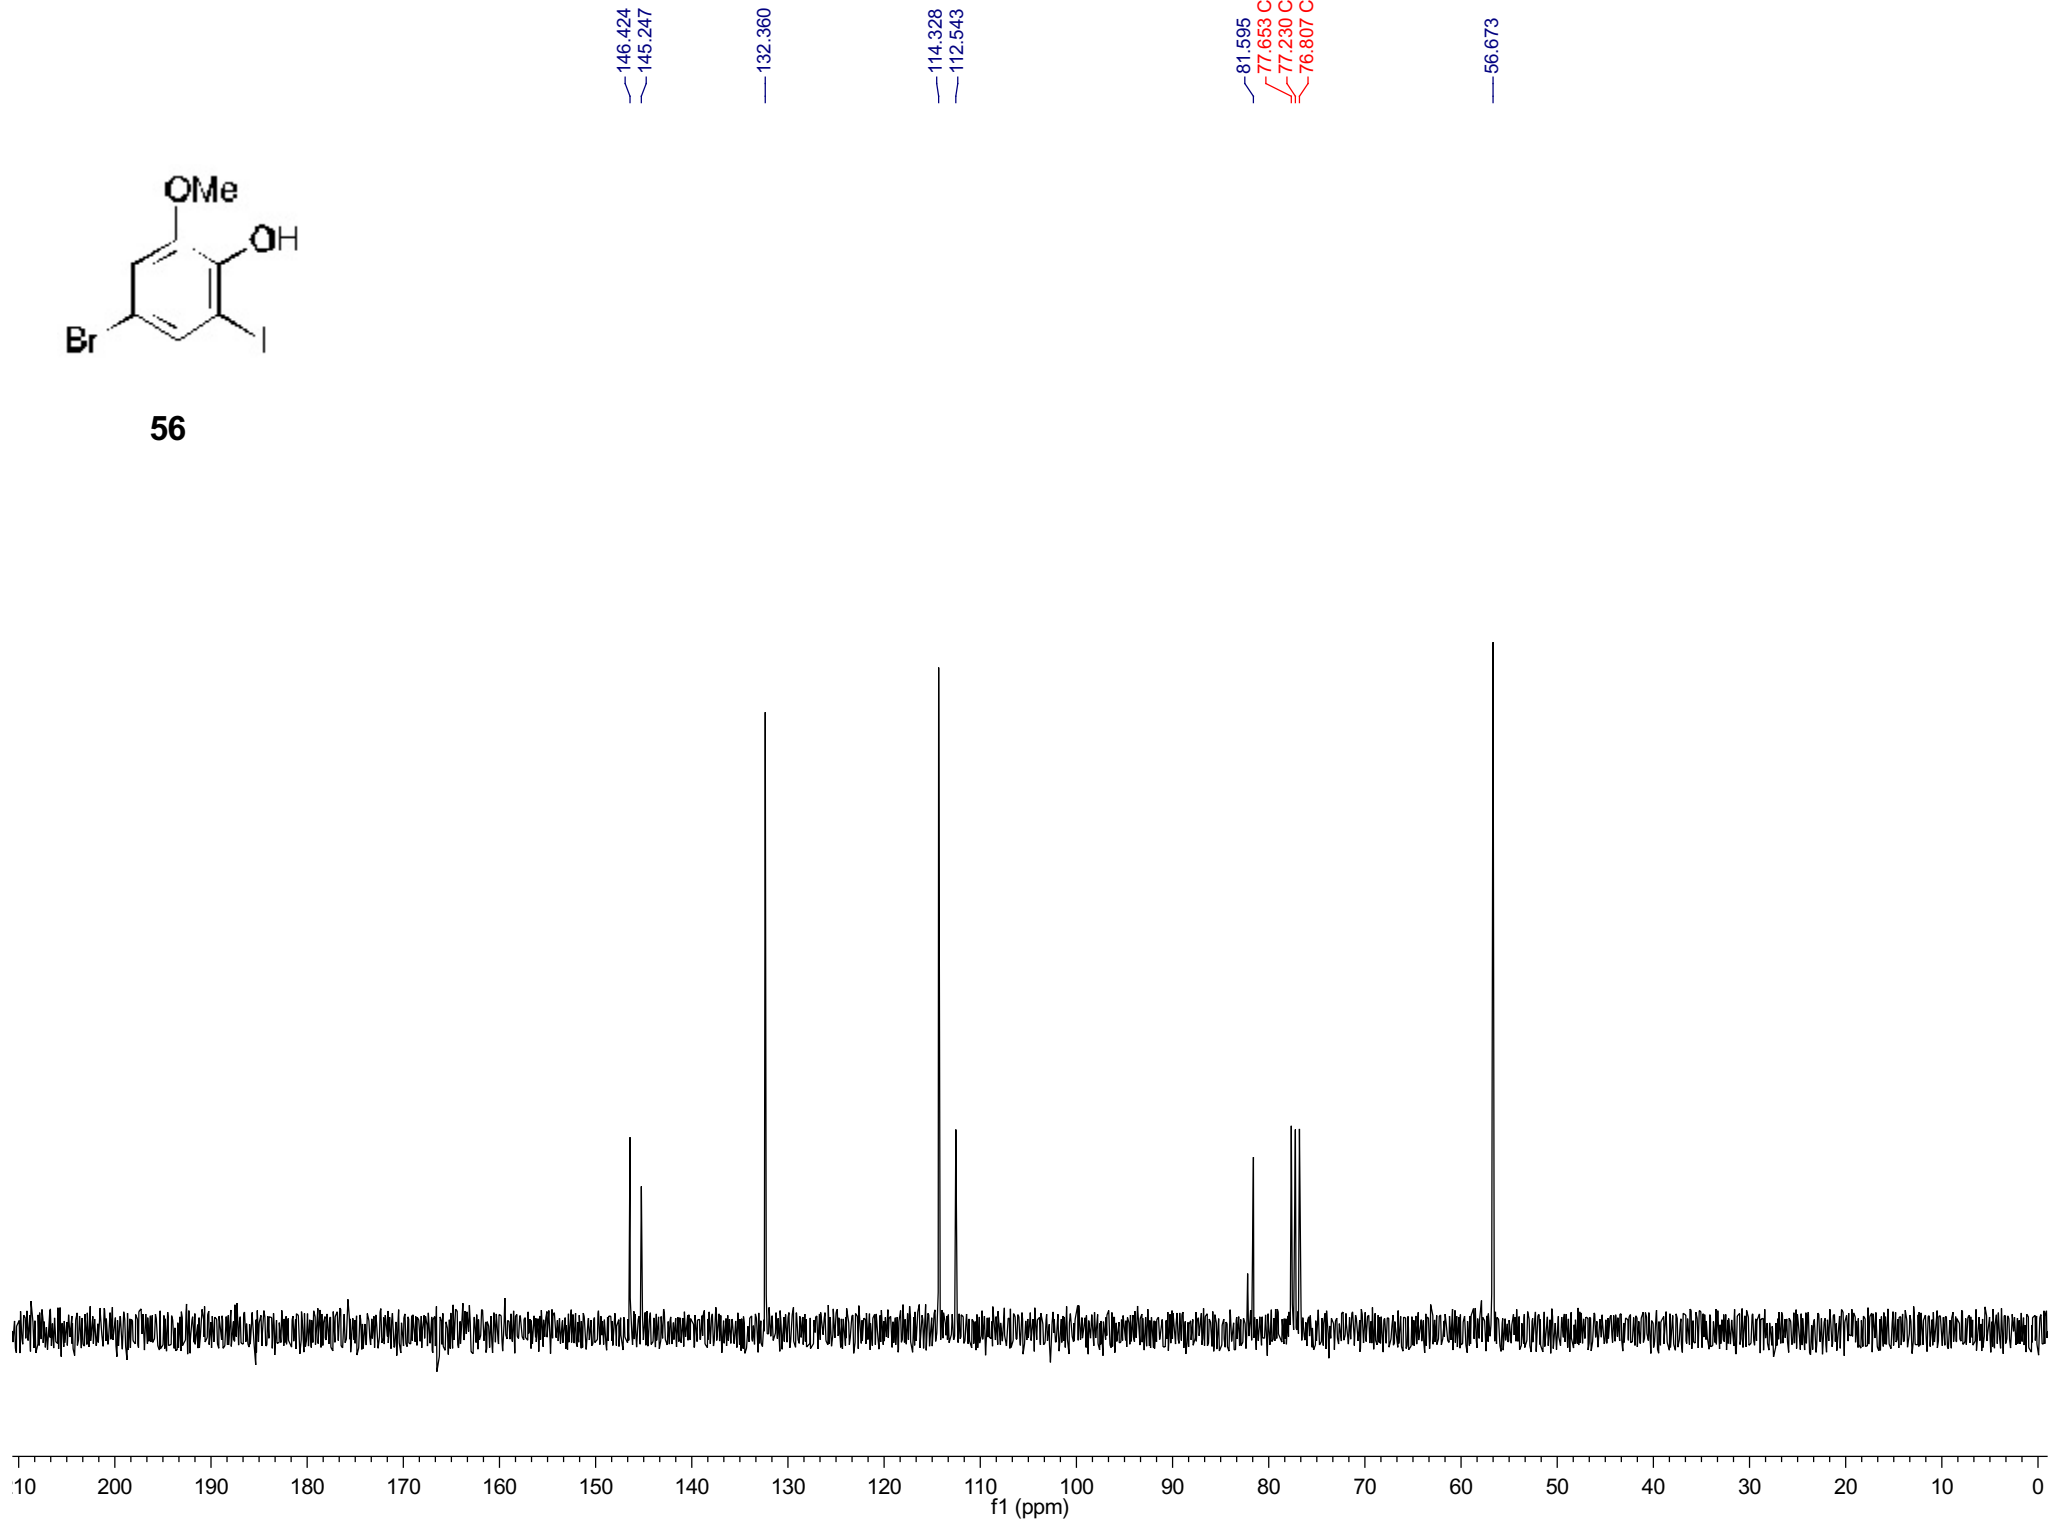

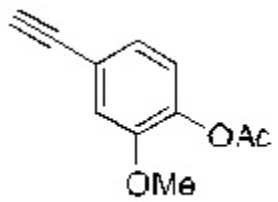

57

7.114  
7.110  
7.094  
7.090  
7.084  
7.079  
6.996  
6.976

3.818

3.078

2.308

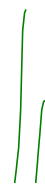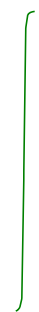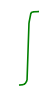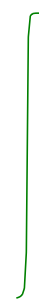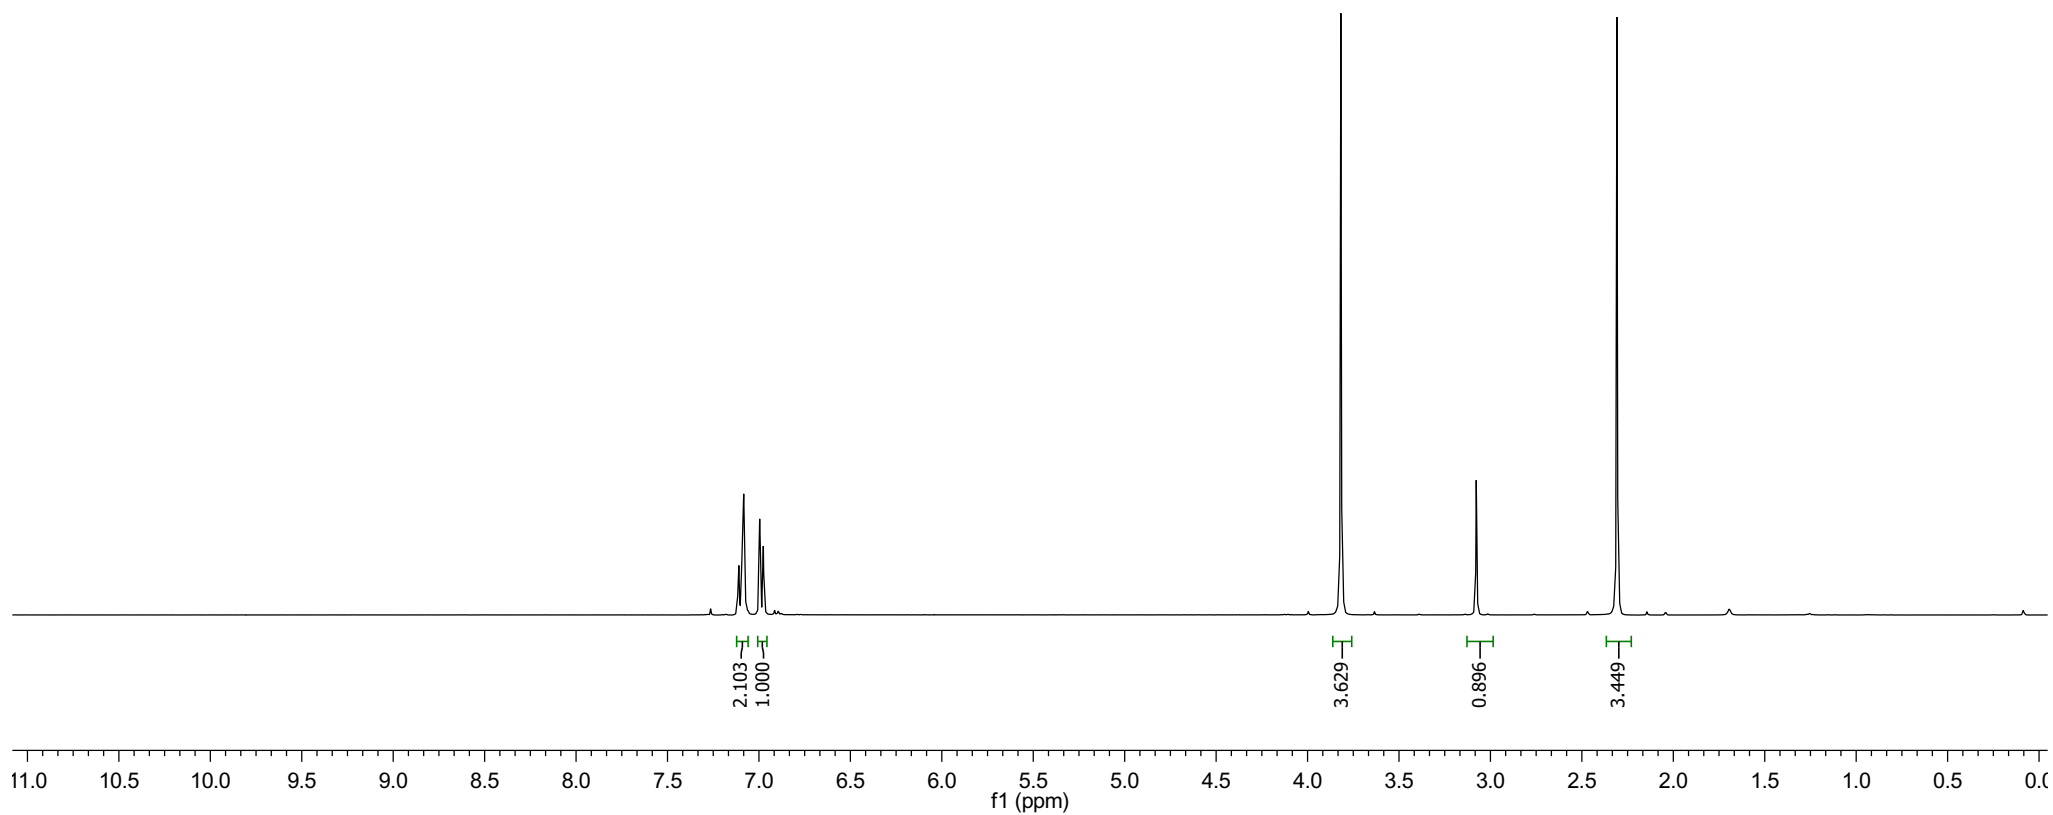

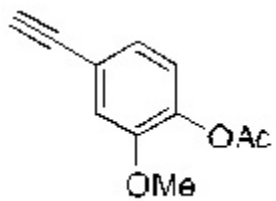

57

168.843

150.956

140.524

125.060

123.030

120.804

116.030

83.177

77.652 CDCl<sub>3</sub>

77.269 CDCl<sub>3</sub>

77.226 CDCl<sub>3</sub>

76.803 CDCl<sub>3</sub>

56.023

20.745

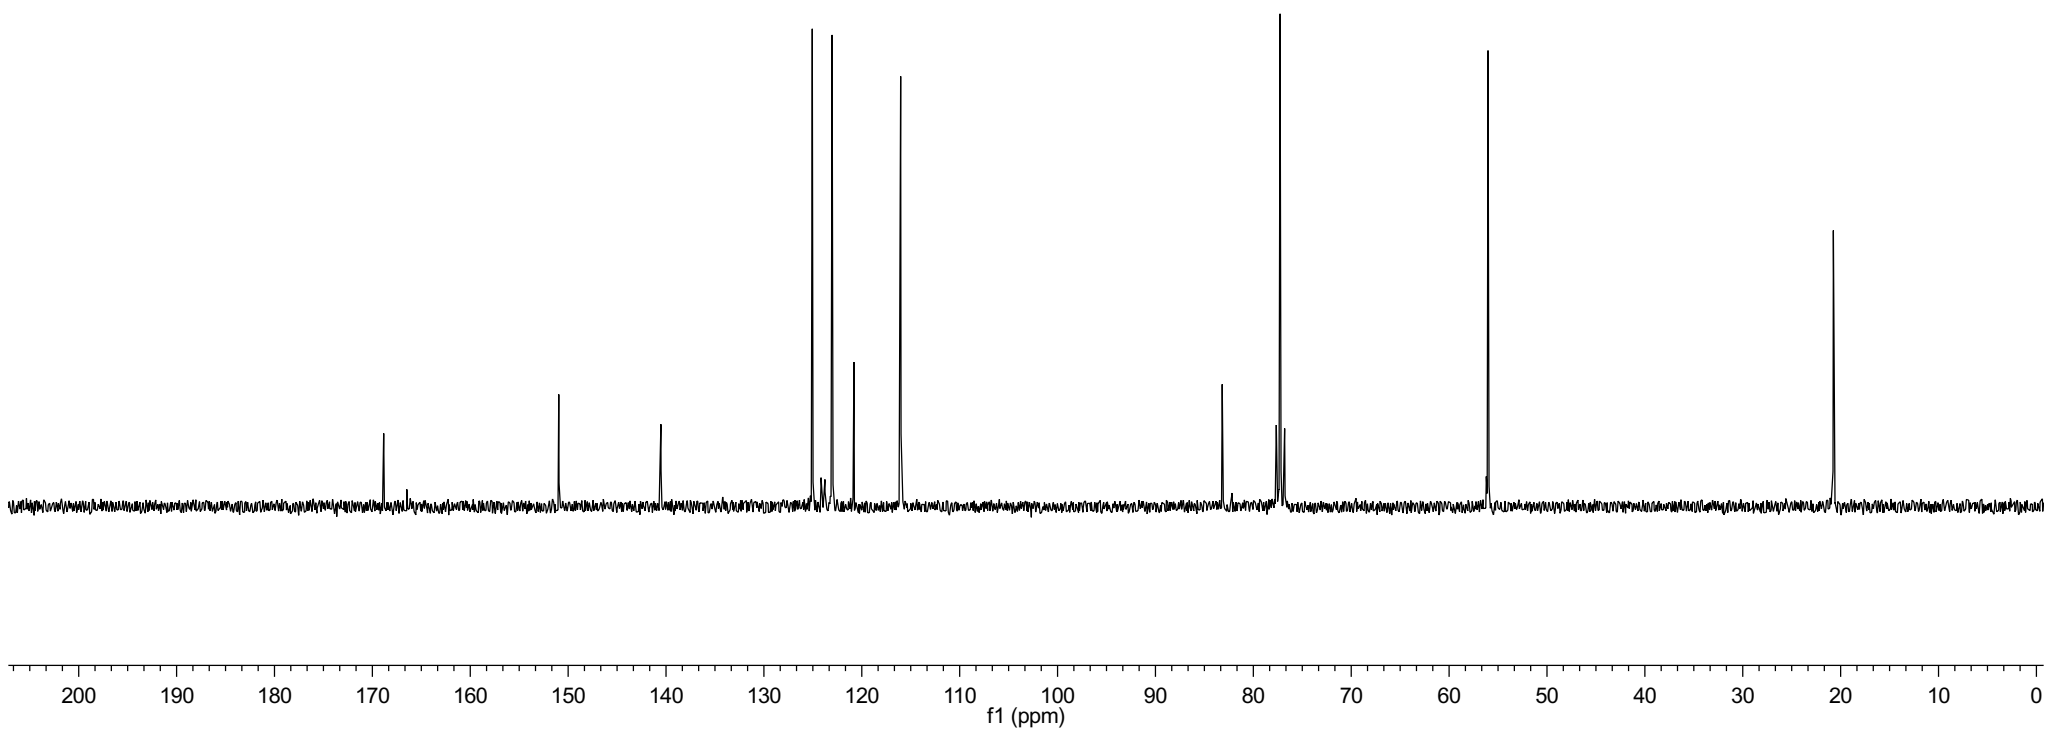

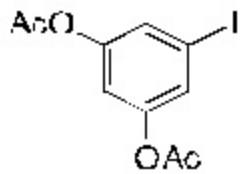

58

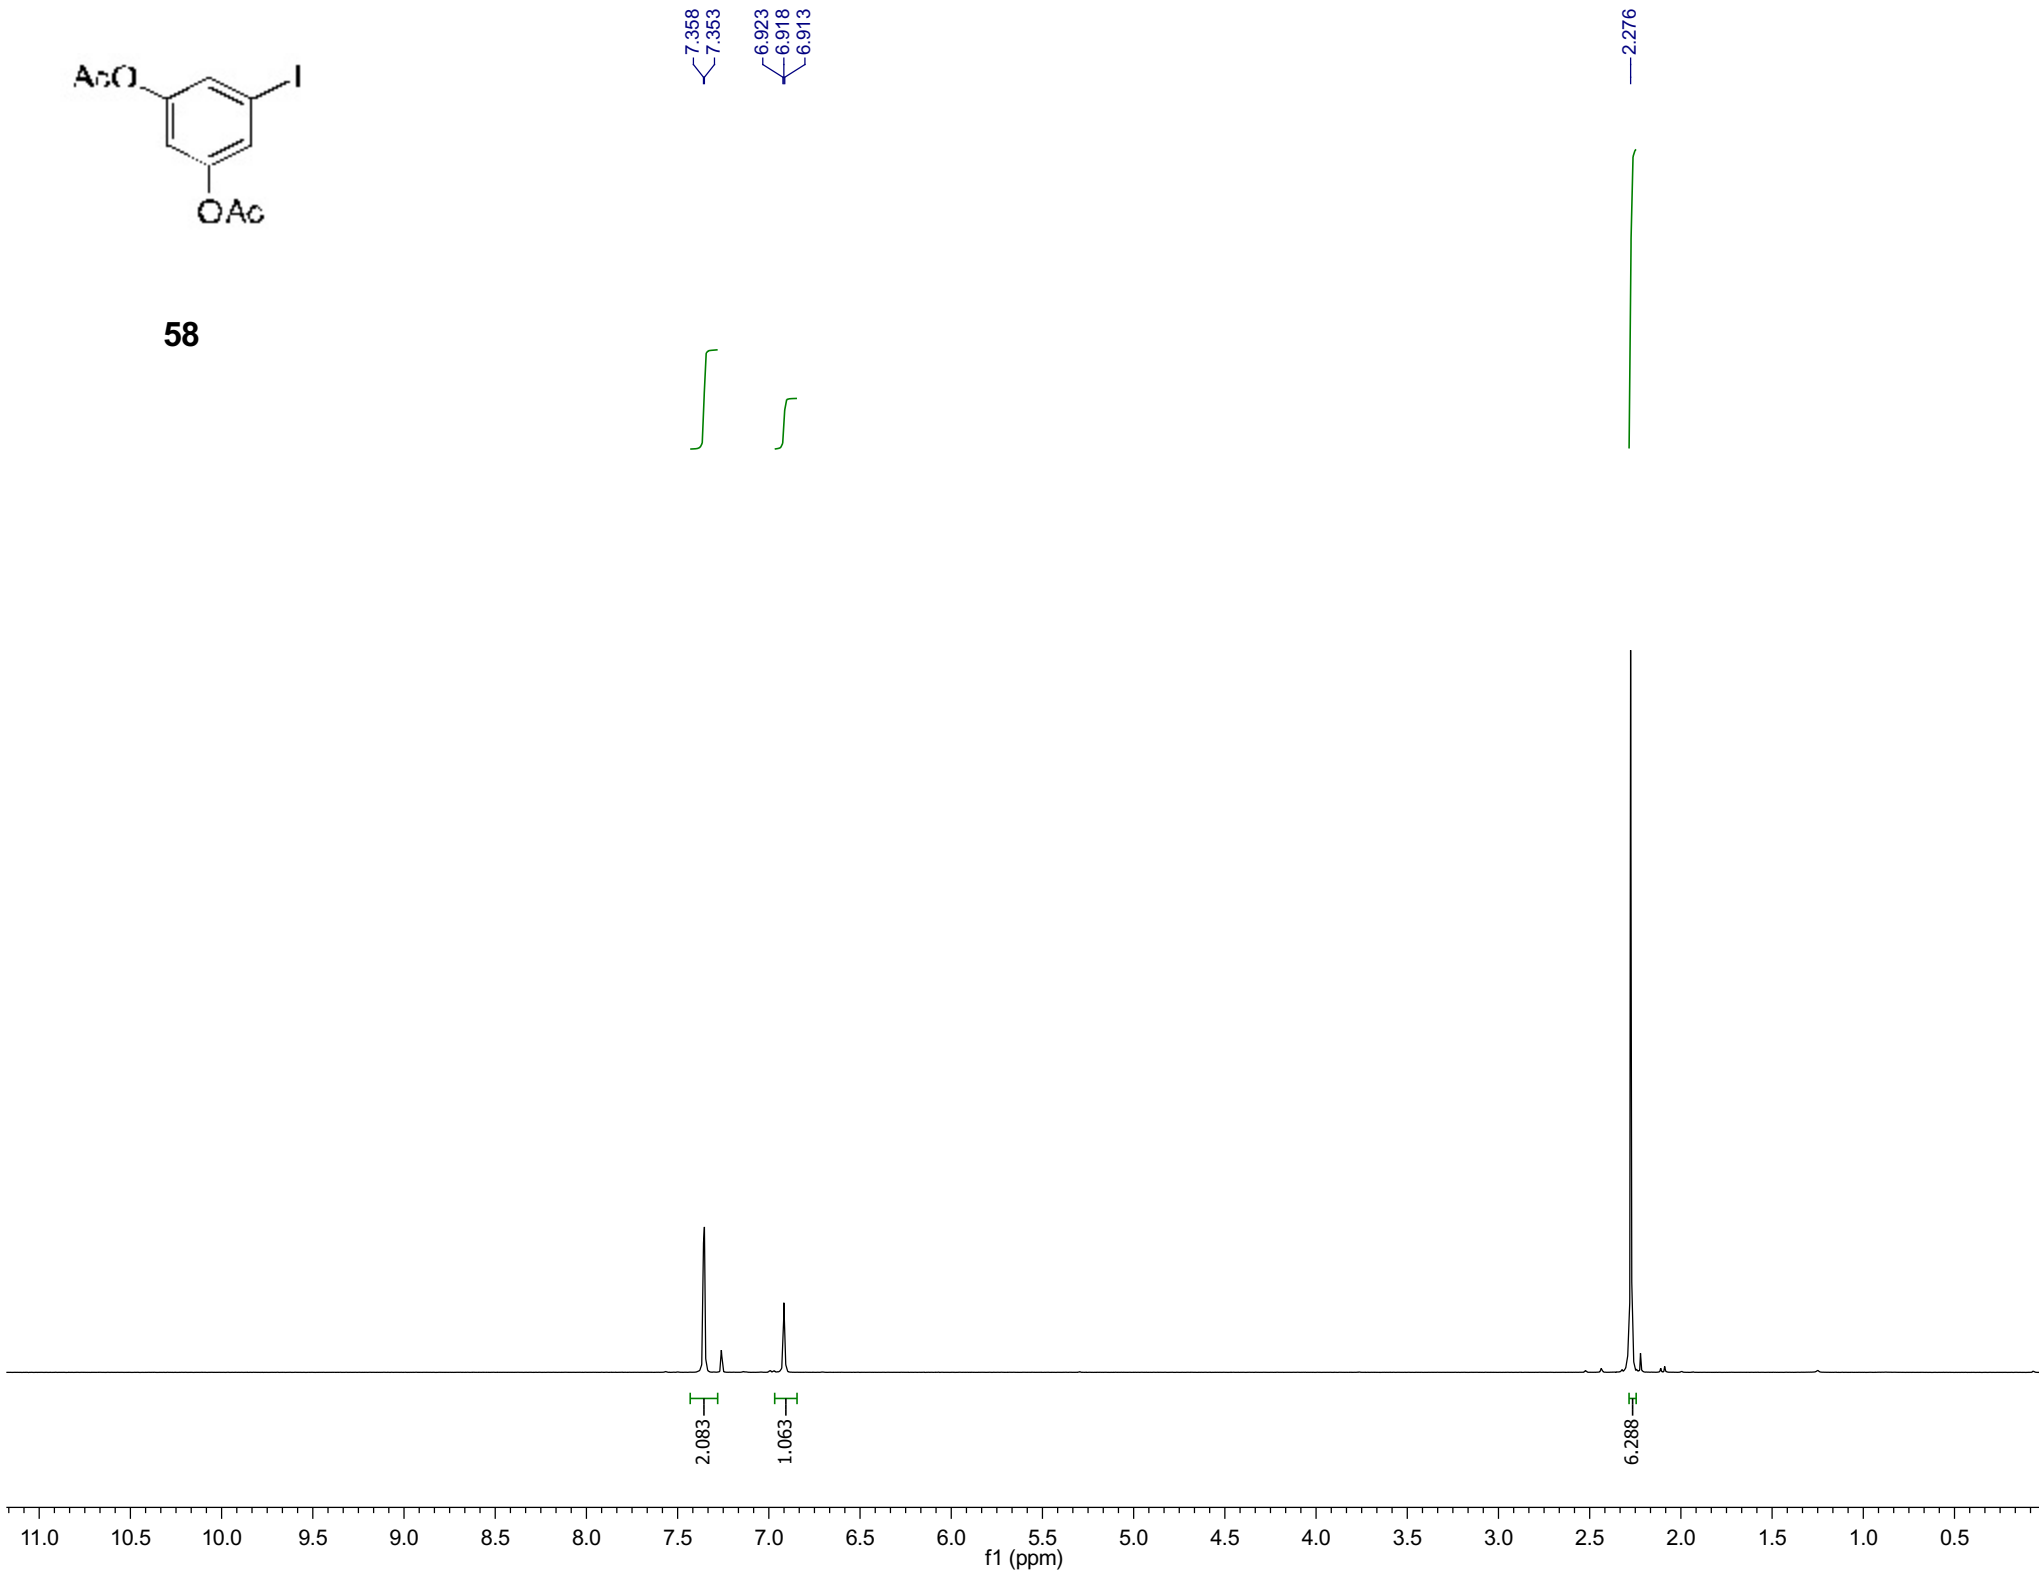

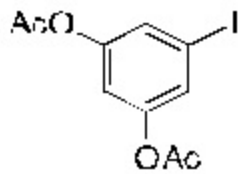

58

168.774

151.278

128.414

115.643

92.689

77.562 CDCl<sub>3</sub>  
77.245 CDCl<sub>3</sub>  
76.927 CDCl<sub>3</sub>

69.515

21.256

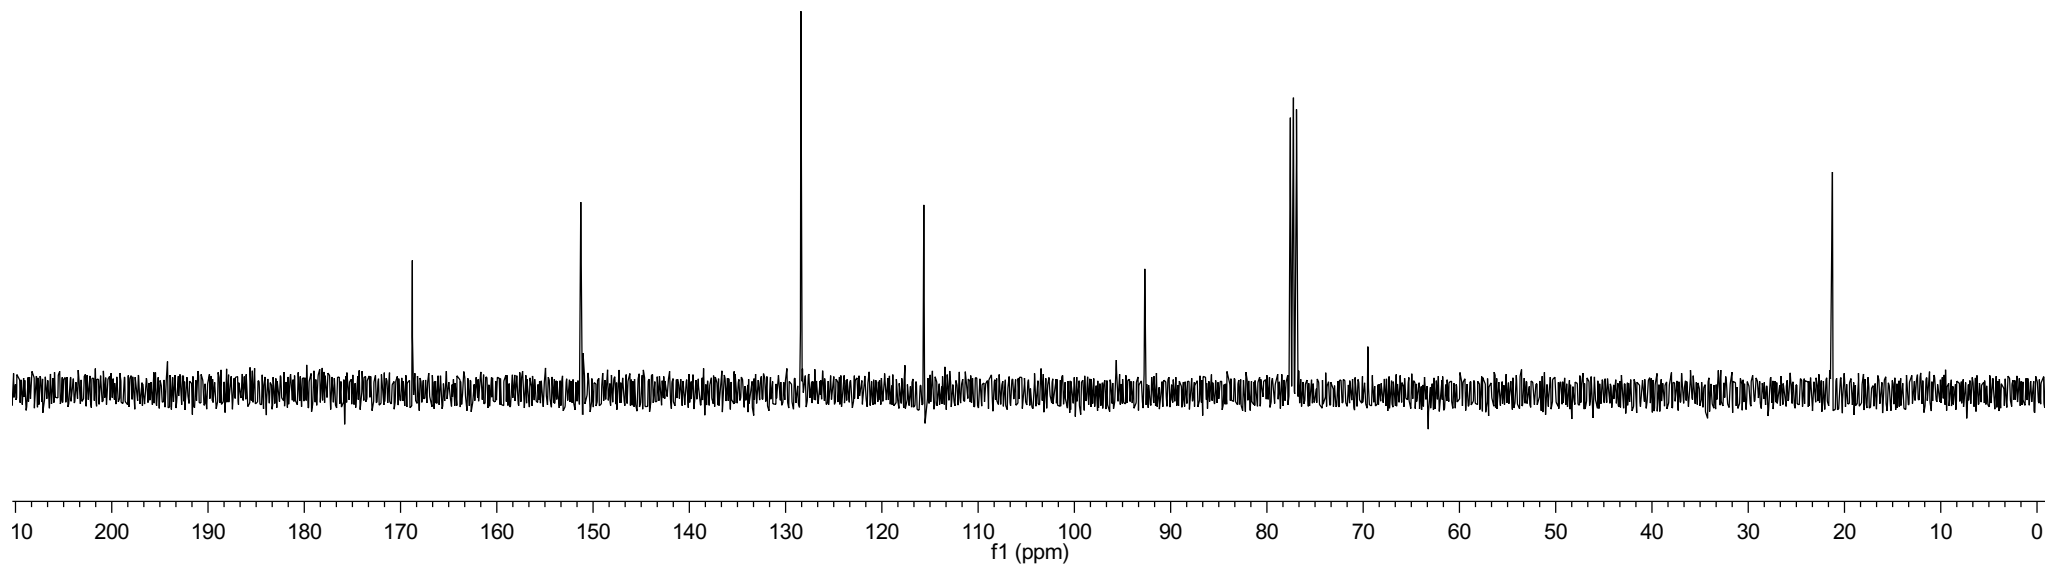

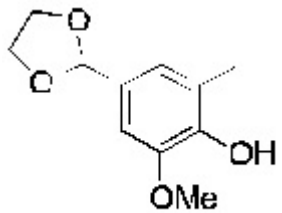

60

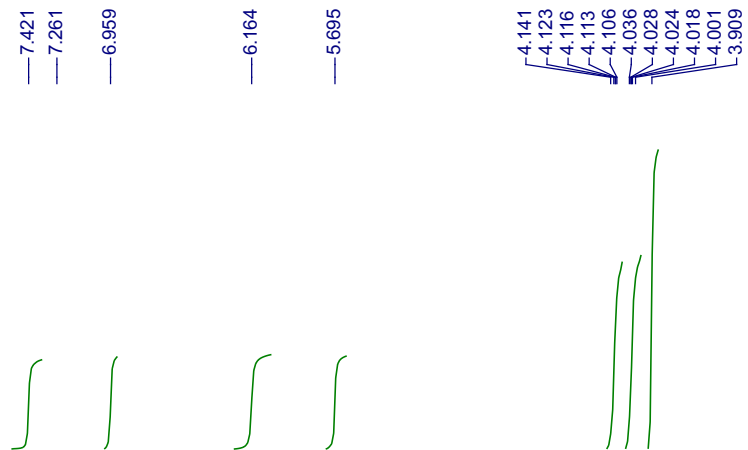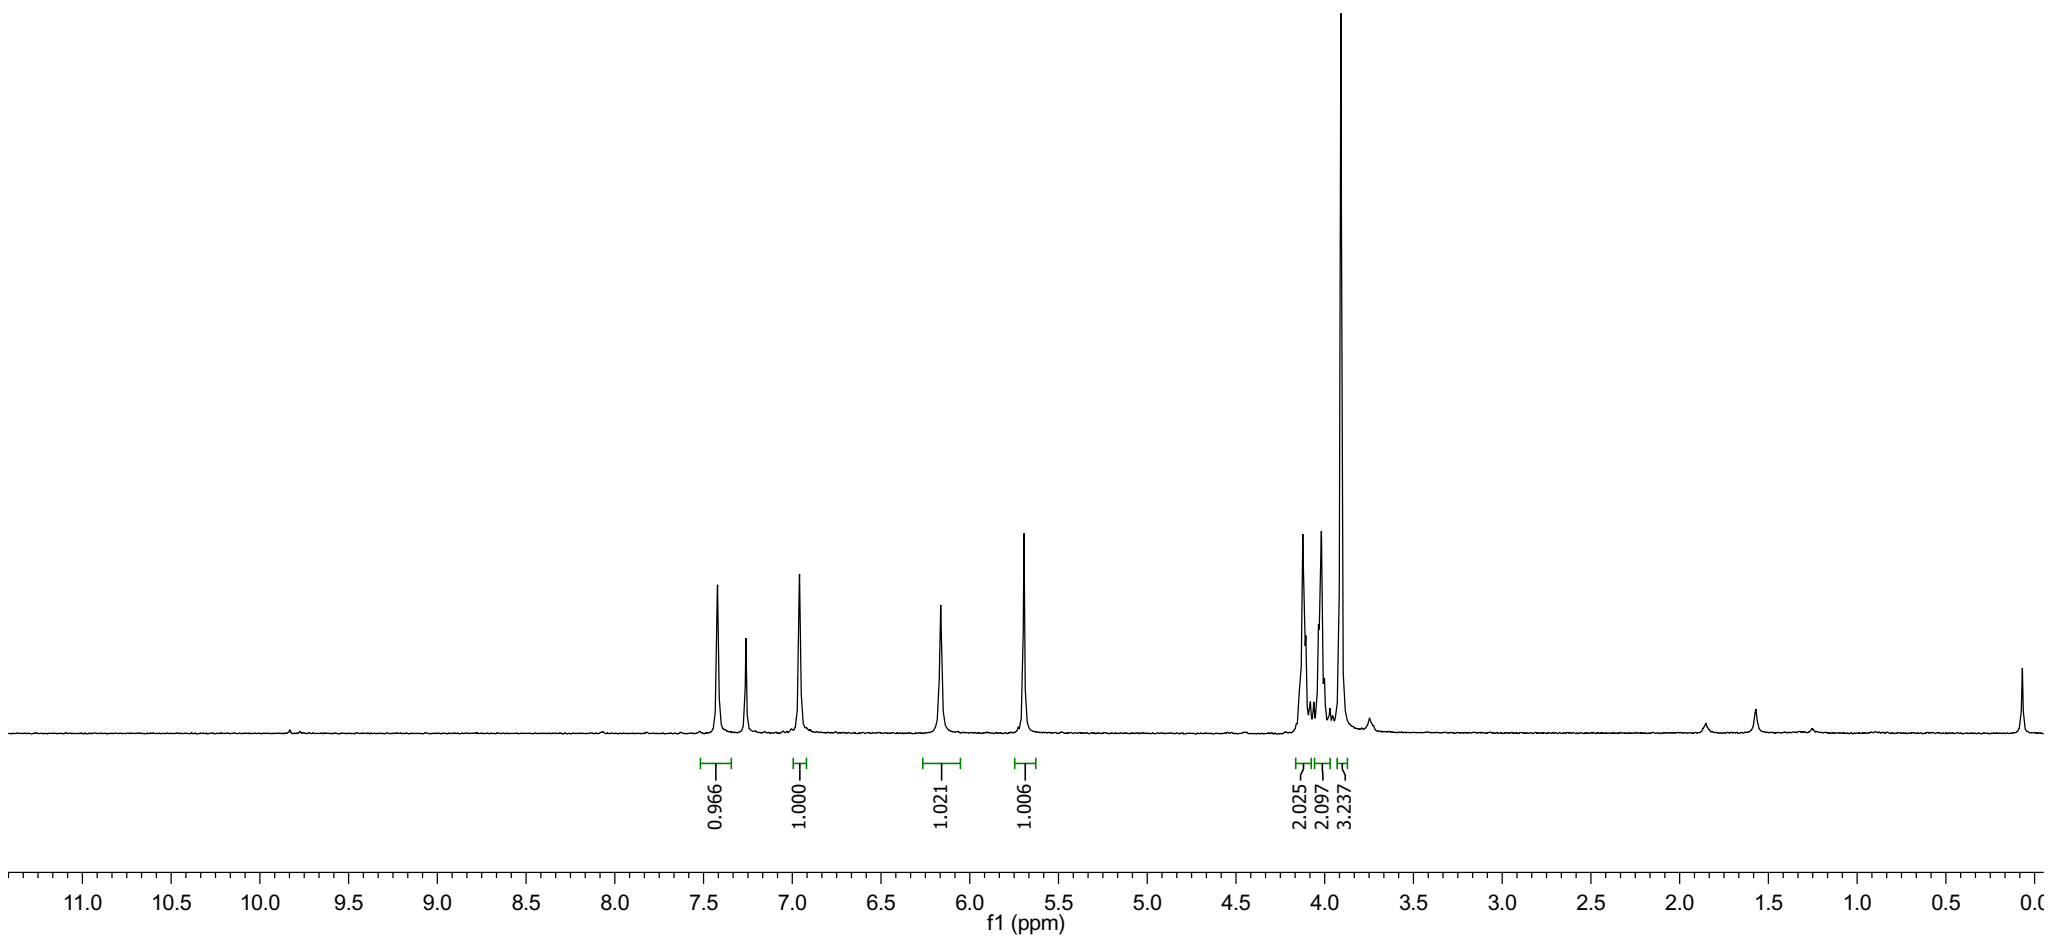

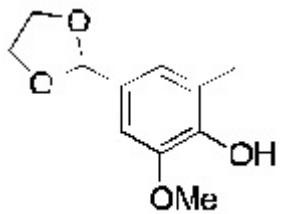

60

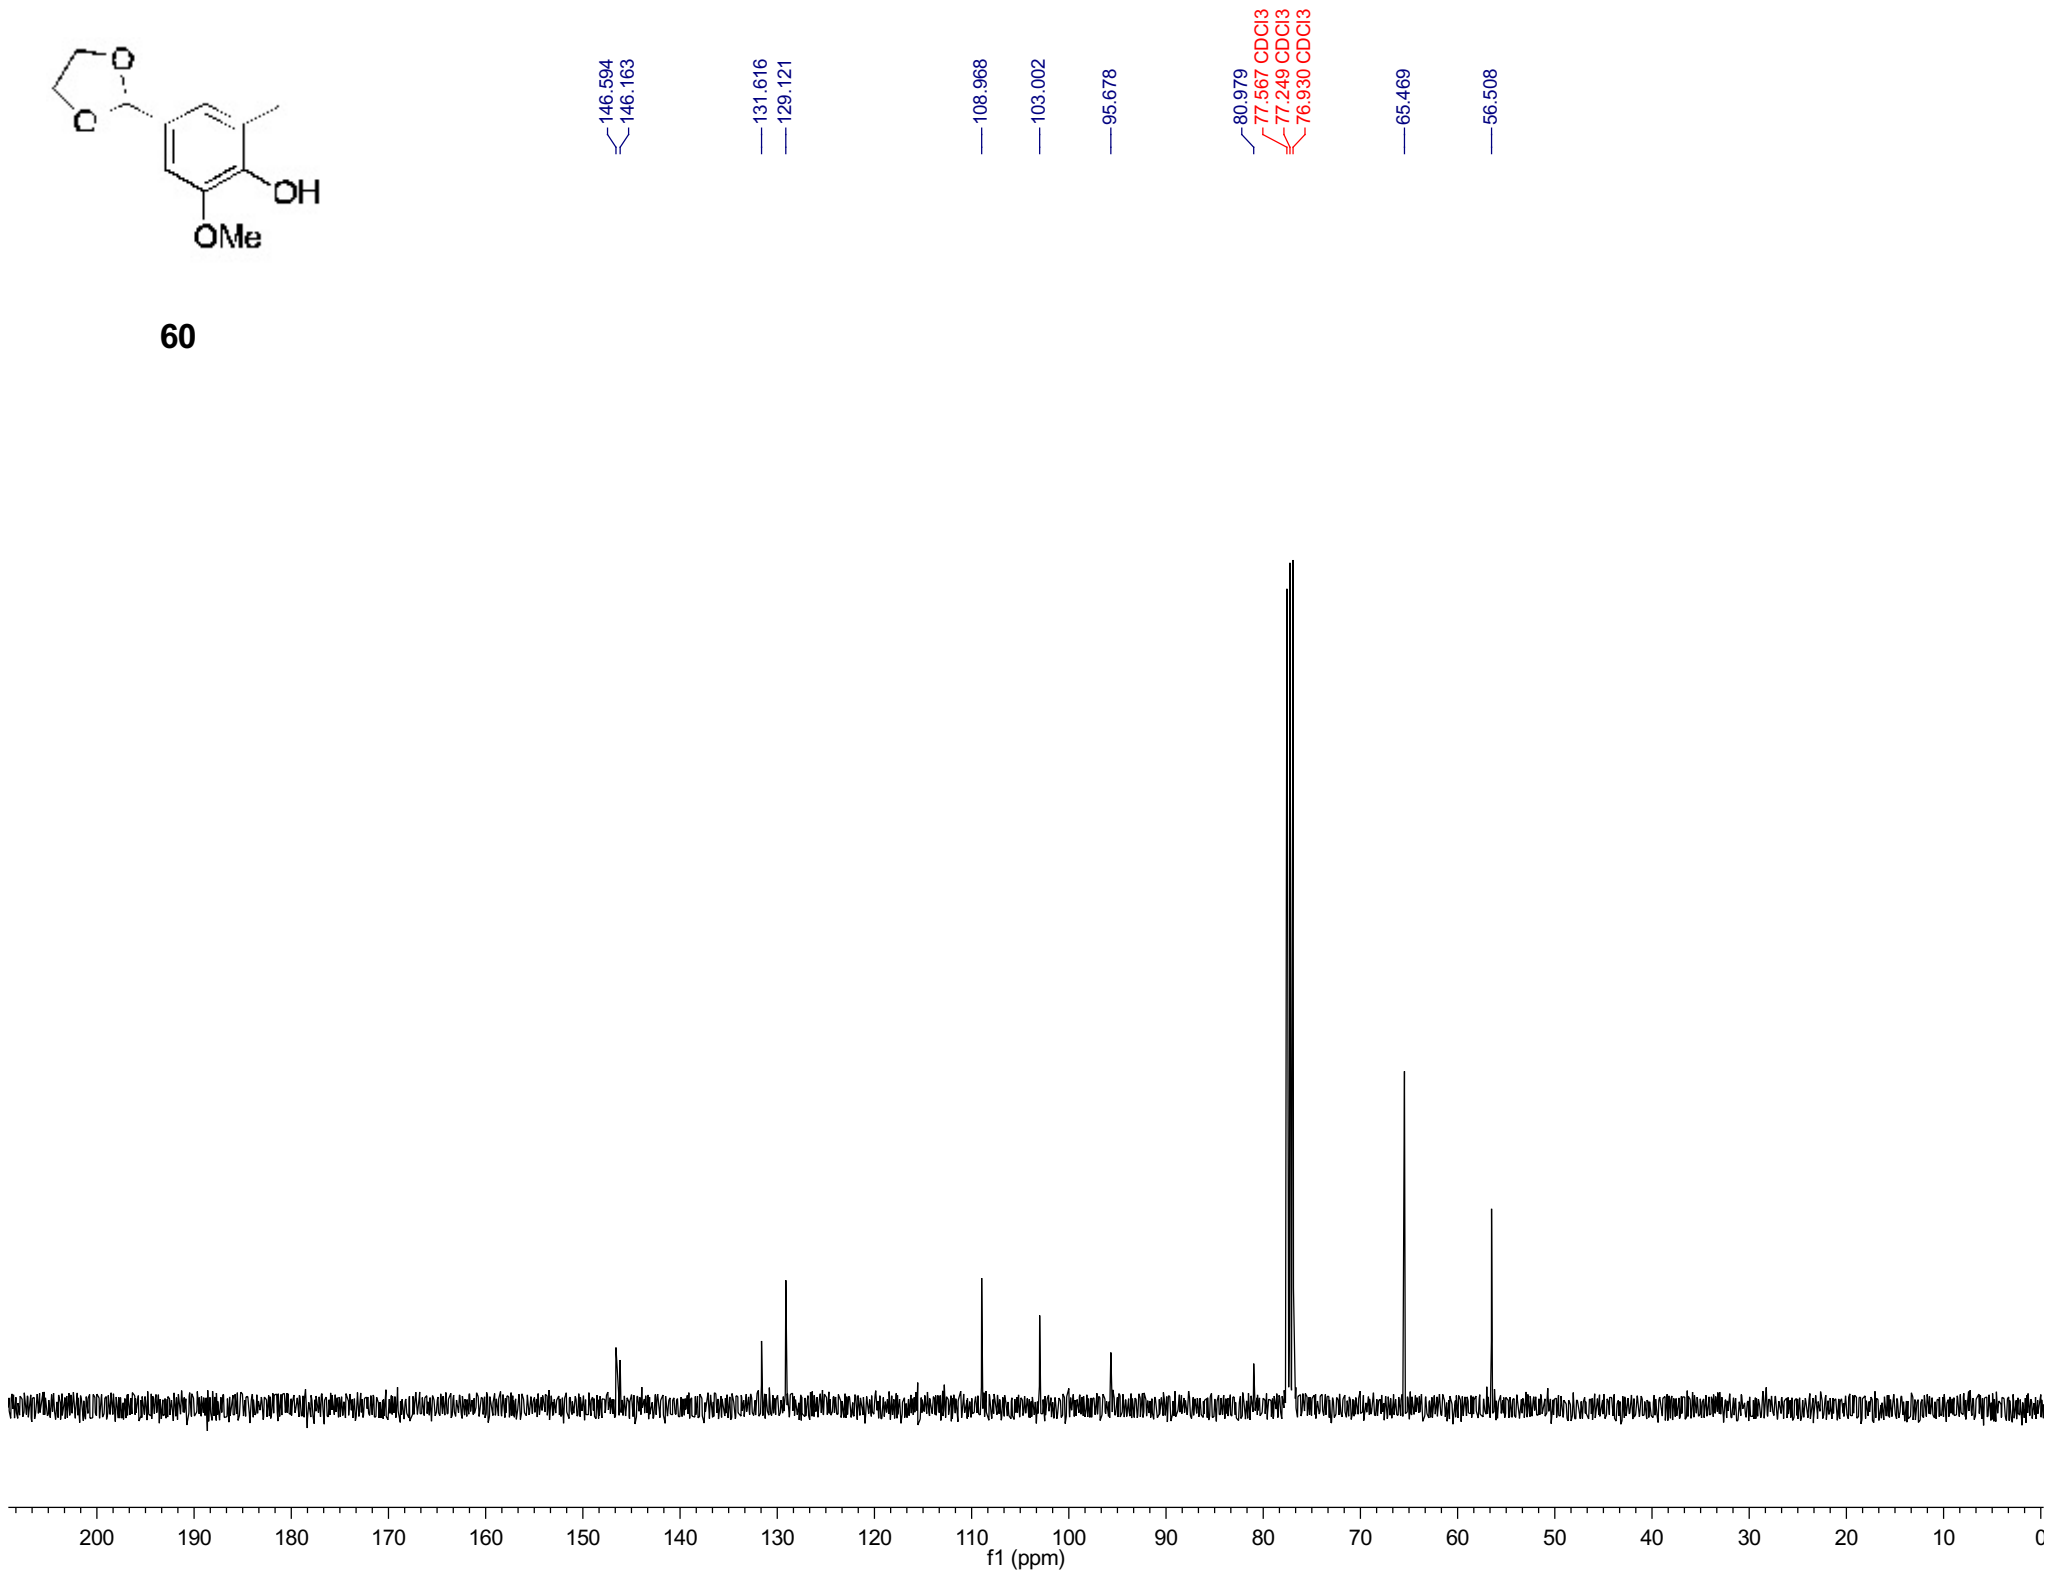

Supplement: NIHMS445477-supplement-01.pdf [file NIHMS445477-supplement-01.pdf]
